# Supplementary material for: An Examination of the Anti-Cancer Properties of Plant Cannabinoids in Preclinical Models of Mesothelioma
Source: Cancers (Basel). 2022 Aug 5;14(15):3813. doi: 10.3390/cancers14153813 (PMC9367527; doi:10.3390/cancers14153813)
Supplement: Supplementary file 1 [file cancers-14-03813-s001.zip]

Archive with 7 entries (7 files):
- Table S3 Open Array gene expression results.xlsx
- Table S4 Open Array shared genes FC.xlsx
- Table S6 CBG comparison IPA data.xls
- Table S5 CBD comparison IPA data.xls
- Table S2 List of Taqman assays on Open Arrays.xls
- Table S1 TaqMan assays used in the study.xlsx
- cancers-1808569-Supplementary Figures.pdf
