# Supplementary material for: An Examination of the Anti-Cancer Properties of Plant Cannabinoids in Preclinical Models of Mesothelioma
Source: Cancers (Basel). 2022 Aug 5;14(15):3813. doi: 10.3390/cancers14153813 (PMC9367527; doi:10.3390/cancers14153813)
Supplement: Supplementary file 1 [file cancers-14-03813-s001.zip › Table S1 TaqMan assays used in the study.xlsx]

## Sheet: Taqman probe ID's
Species	TaqMan Gene Expression Assay Probe No.	Gene Name
Human	Hs01038522_s1	CNR1
	Hs00275635_m1	CNR2
	Hs00271662_s1	GPR55
	Hs00218912_m1	TRPV1
	Hs00901648_m1	TRPV2
	Hs01115513_m1	PPAR-g
	Hs00265014_s1	HTR1A
Rat	Rn02758689_s1	CNR1
	Rn01637601_m1	CNR2
	Rn03037213_s1	GPR55
	Rn00583117_m1	TRPV1
	Rn00567974_m1	TRPV2
	Rn00440945_m1	PPAR-g
	Rn00561409_s1	HTR1A
