# Supplementary material for: An Examination of the Anti-Cancer Properties of Plant Cannabinoids in Preclinical Models of Mesothelioma
Source: Cancers (Basel). 2022 Aug 5;14(15):3813. doi: 10.3390/cancers14153813 (PMC9367527; doi:10.3390/cancers14153813)
Supplement: Supplementary file 1 [file cancers-14-03813-s001.zip › Table S2 List of Taqman assays on Open Arrays.xls]

## Sheet: Assay list
TaqMan® OpenArray® Human Cancer Panel, QuantStudio™ 12K Flex
Assay ID	Gene	Target/Control
Hs00152928_m1	EGR1	Target
Hs00152933_m1	TLR3	Target
Hs00152939_m1	TLR4	Target
Hs00152971_m1	TLR7	Target
Hs00152973_m1	TLR9	Target
Hs00153074_m1	ROCK2	Target
Hs00153138_m1	CCNA2	Target
Hs00153277_m1	CDKN1B	Endogenous Control
Hs00153280_m1	TP53I3	Target
Hs00153294_m1	RELA	Target
Hs00153353_m1	BIRC5	Target
Hs00153380_m1	CCND2	Target
Hs00153418_m1	RAD51	Target
Hs00153451_m1	E2F1	Target
Hs00153510_m1	MME	Target
Hs00154054_m1	ANXA5	Target
Hs00154208_m1	CA9	Target
Hs00154457_m1	CIRBP	Target
Hs00155479_m1	CYR61	Target
Hs00156411_m1	CDC25C	Target
Hs00156454_m1	CEBPG	Target
Hs00156455_m1	CENPA	Target
Hs00157163_m1	CTPS	Target
Hs00157213_m1	CTSE	Target
Hs00157731_m1	GNAZ	Target
Hs00157817_m1	GRB2	Target
Hs00159081_m1	MATN3	Target
Hs00159092_m1	MDM4	Target
Hs00159210_m1	MNDA	Target
Hs00159600_m1	NID1	Target
Hs00159627_m1	NMBR	Target
Hs00160947_m1	PTPRN	Target
Hs00161707_m1	SKI	Target
Hs00161719_m1	SLC1A4	Target
Hs00161826_m1	SLC16A1	Target
Hs00162613_m1	TCF4	Target
Hs00163506_m1	ACADS	Target
Hs00163761_m1	BTK	Target
Hs00164004_m1	COL1A1	Target
Hs00164932_m1	ICAM1	Target
Hs00164940_m1	IDUA	Target
Hs00165949_m1	TIMP3	Target
Hs00166071_m1	BLMH	Target
Hs00166169_m1	G6PD	Endogenous Control
Hs00166223_m1	IFNGR1	Target
Hs00166294_m1	KRT2	Target
Hs00166467_m1	OXCT1	Target
Hs00167402_m1	ACY1	Target
Hs00168547_m1	NQO1	Target
Hs00169258_m1	F2R	Target
Hs00169407_m1	RIPK1	Target
Hs00169491_m1	STK3	Target
Hs00169714_m1	NF1	Target
Hs00169777_m1	PECAM1	Target
Hs00170630_m1	FOS	Target
Hs00170723_m1	TYRO3	Target
Hs00170780_m1	CIB1	Target
Hs00171022_m1	CXCL12	Target
Hs00171132_m1	GDF15	Target
Hs00171165_m1	OSM	Target
Hs00171172_m1	AR	Target
Hs00171191_m1	FBN1	Target
Hs00171254_m1	IGF2	Target
Hs00171375_m1	FES	Target
Hs00171558_m1	TIMP1	Target
Hs00171656_m1	EPHA2	Target
Hs00171832_m1	FGF8	Target
Hs00172187_m1	POLR2A	Endogenous Control
Hs00172870_m1	NR2F6	Target
Hs00172895_m1	ABI2	Target
Hs00173072_m1	TSG101	Target
Hs00173503_m1	FRZB	Target
Hs00173611_m1	KLK10	Target
Hs00173742_m1	FGF3	Target
Hs00173872_m1	ODZ1	Target
Hs00174029_m1	KIT	Target
Hs00174128_m1	TNF	Target
Hs00174141_m1	CD59	Target
Hs00174164_m1	CSF1	Target
Hs00174297_m1	CD70	Target
Hs00174474_m1	LAMP2	Target
Hs00174517_m1	NFKB2	Target
Hs00174674_m1	IER3	Target
Hs00174819_m1	SEMA4D	Target
Hs00174860_m1	ESR1	Target
Hs00174877_m1	LEP	Target
Hs00174970_m1	STC1	Target
Hs00175188_m1	CTSC	Target
Hs00175935_m1	CDK4	Target
Hs00175938_m1	CDKN1C	Target
Hs00176119_m1	AK1	Target
Hs00176222_m1	CDK9	Target
Hs00176258_m1	CSNK1G2	Target
Hs00176481_m1	CDKN2D	Target
Hs00176538_m1	ERBB3	Target
Hs00176628_m1	FYN	Target
Hs00176719_m1	LYN	Target
Hs00176815_m1	PAK1	Target
Hs00176839_m1	CDK17	Target
Hs00176884_m1	PDPK1	Target
Hs00176966_m1	PRKAR2B	Target
Hs00176973_m1	PRKCA	Target
Hs00176998_m1	PRKCB	Target
Hs00177010_m1	PRKCG	Target
Hs00177037_m1	PRKD1	Target
Hs00177051_m1	PRKCZ	Target
Hs00177357_m1	RPS6KB1	Target
Hs00177464_m1	TYK2	Target
Hs00177481_m1	AKAP1	Target
Hs00177522_m1	CDC42BPA	Target
Hs00177708_m1	TNK1	Target
Hs00177766_m1	CDKL1	Target
Hs00177774_m1	PKMYT1	Target
Hs00177821_m1	BUB1	Target
Hs00177957_m1	MAPKAPK3	Target
Hs00178289_m1	AKT1	Target
Hs00178297_m1	MAP3K8	Target
Hs00178340_m1	FGR	Target
Hs00178427_m1	LCK	Target
Hs00178455_m1	PRKCE	Target
Hs00178463_m1	ROCK1	Target
Hs00178494_m1	SRC	Target
Hs00178500_m1	TIE1	Target
Hs00178726_m1	MAP3K5	Target
Hs00178837_m1	CDK16	Target
Hs00178914_m1	PRKCD	Target
Hs00179382_m1	APPL1	Target
Hs00179683_m1	STK32B	Target
Hs00179843_m1	SHH	Target
Hs00179845_m1	MET	Target
Hs00180035_m1	NRAS	Target
Hs00180127_m1	DEK	Target
Hs00180269_m1	BAX	Target
Hs00180288_m1	CBLB	Target
Hs00180312_m1	MLLT3	Target
Hs00180437_m1	DCC	Target
Hs00180450_m1	GRB7	Target
Hs00180529_m1	WNT1	Target
Hs00180533_m1	ARHGEF5	Target
Hs00180562_m1	RBL2	Target
Hs00180679_m1	PIK3CA	Target
Hs00181051_m1	APC	Target
Hs00181211_m1	IGFBP3	Target
Hs00181419_m1	IGF2R	Target
Hs00181605_m1	ADM	Target
Hs00181767_m1	IGFBP4	Target
Hs00181881_m1	ITPR1	Target
Hs00182059_m1	MCC	Target
Hs00182082_m1	MYD88	Target
Hs00182192_m1	PLCG2	Target
Hs00182314_m1	RASGRF1	Target
Hs00182370_m1	SHB	Target
Hs00182558_m1	TRADD	Target
Hs00182896_m1	DVL1	Target
Hs00183533_m1	IPO8	Endogenous Control
Hs00183573_m1	GNA13	Target
Hs00183624_m1	NMU	Target
Hs00183953_m1	BCAR1	Target
Hs00184427_m1	BARD1	Target
Hs00184500_m1	ABCB1	Target
Hs00185390_m1	BAG1	Target
Hs00185574_m1	EZR	Target
Hs00185584_m1	VIM	Target
Hs00186374_m1	PIR	Target
Hs00186419_m1	BHLHE40	Target
Hs00186447_m1	DEGS1	Target
Hs00186495_m1	TMEFF1	Target
Hs00186689_m1	ALDH4A1	Target
Hs00187740_m1	PRC1	Target
Hs00188713_m1	BAG3	Target
Hs00189535_m1	FUT8	Target
Hs00191535_m1	CLTC	Target
Hs00191583_m1	LITAF	Target
Hs00191882_m1	DHX8	Target
Hs00192202_m1	MARS	Target
Hs00192399_m1	PIK3CD	Target
Hs00192574_m1	SFPQ	Target
Hs00192581_m1	SIAH2	Target
Hs00193725_m1	XRCC3	Target
Hs00193920_m1	CHAF1A	Target
Hs00194421_m1	ALDH6A1	Target
Hs00195432_m1	SMAD1	Target
Hs00195504_m1	MCM6	Target
Hs00195612_m1	TBX3	Target
Hs00196101_m1	NDC80	Target
Hs00196132_m1	PRAME	Target
Hs00196146_m1	PECI	Target
Hs00196542_m1	PPP2R5A	Target
Hs00196708_m1	SFRS7	Target
Hs00197328_m1	HYOU1	Target
Hs00197394_m1	PRDX4	Target
Hs00197646_m1	TBL3	Target
Hs00197856_m1	SARS	Target
Hs00197982_m1	BCL2L11	Target
Hs00198091_m1	CGRRF1	Target
Hs00198320_m1	PLK2	Target
Hs00198887_m1	BTG2	Target
Hs00199831_m1	ESM1	Target
Hs00200720_m1	PHB2	Target
Hs00201046_m1	HYAL1	Target
Hs00201226_m1	CASC3	Endogenous Control
Hs00202756_m1	SEC14L2	Target
Hs00204173_m1	MRPL13	Target
Hs00204205_m1	ATAD2	Target
Hs00204876_m1	ORC6L	Target
Hs00205182_m1	SND1	Target
Hs00205854_m1	RHOD	Target
Hs00208408_m1	KIF14	Target
Hs00211096_m1	CAMK2A	Target
Hs00212390_m1	LEF1	Target
Hs00212828_m1	PRKD2	Target
Hs00216455_m1	ECT2	Target
Hs00217947_m1	FGD6	Target
Hs00220127_m1	MCCC1	Target
Hs00220348_m1	CHPT1	Target
Hs00220393_m1	MGST1	Target
Hs00221277_m1	SCUBE2	Target
Hs00221499_m1	KAT2A	Target
Hs00221664_m1	DLG3	Target
Hs00221707_m1	XRCC5	Target
Hs00225132_m1	RASL11B	Target
Hs00229135_m1	WNT3	Target
Hs00230762_m1	GPR39	Target
Hs00231092_m1	E2F5	Target
Hs00231101_m1	ETV6	Target
Hs00231279_m1	REL	Target
Hs00231476_m1	TFAP2C	Target
Hs00231535_m1	CNBP	Target
Hs00231780_m1	EGR3	Target
Hs00231838_m1	MLLT10	Target
Hs00231908_m1	KDM5A	Target
Hs00232013_m1	FOSL2	Target
Hs00232074_m1	MYCN	Target
Hs00232399_m1	RELB	Target
Hs00232479_m1	LZTR1	Target
Hs00233492_m1	CANX	Target
Hs00233722_m1	ITGA3	Target
Hs00233790_m1	ITGAV	Target
Hs00234046_m1	PLCG1	Target
Hs00234119_m1	RAF1	Target
Hs00234140_m1	CCL2	Target
Hs00234244_m1	TGFB2	Target
Hs00234253_m1	TGFBR2	Target
Hs00234508_m1	MTOR	Target
Hs00234579_m1	MMP9	Target
Hs00234753_m1	MDM2	Target
Hs00234864_m1	HMMR	Target
Hs00236216_m1	ITGB4	Target
Hs00236329_m1	BCL2L1	Target
Hs00236810_m1	CP	Target
Hs00236884_m1	CSF3	Target
Hs00236949_m1	CCND3	Target
Hs00237047_m1	YWHAZ	Endogenous Control
Hs00237119_m1	MMP14	Target
Hs00241111_m1	FGFR1	Target
Hs00241497_m1	KITLG	Target
Hs00241844_m1	SERPINH1	Target
Hs00242386_m1	CBFB	Target
Hs00242728_m1	LIMK1	Target
Hs00242993_m1	PFKP	Target
Hs00243140_m1	ARID4A	Target
Hs00243327_m1	XRCC4	Target
Hs00243533_m1	CDK13	Target
Hs00247620_m1	NRG1	Target
Hs00248075_m1	BBC3	Target
Hs00248408_m1	40792	Target
Hs00248563_m1	PLCB1	Target
Hs00253876_m1	NR1D1	Target
Hs00254392_m1	EGLN1	Target
Hs00255374_m1	UCHL5	Target
Hs00255603_m1	GNAS	Target
Hs00259932_m1	SELENBP1	Target
Hs00259967_m1	PPP1R1B	Target
Hs00262861_m1	CDK4	Target
Hs00263393_m1	GTF2I	Target
Hs00264721_m1	MSH6	Target
Hs00264877_m1	PLG	Target
Hs00266592_m1	FBN2	Target
Hs00267157_s1	MAS1	Target
Hs00267597_m1	PRKAR1A	Target
Hs00268060_m1	MAPK12	Target
Hs00268847_m1	USP7	Target
Hs00268954_s1	FZD9	Target
Hs00269428_m1	PEA15	Target
Hs00269492_m1	TNFRSF10A	Target
Hs00269500_m1	GMPS	Target
Hs00269660_s1	RHOB	Target
Hs00269944_m1	BRAF	Target
Hs00269977_m1	COX6C	Target
Hs00270282_m1	STX1A	Target
Hs00270424_m1	CCNB2	Target
Hs00270514_m1	LONP1	Target
Hs00270768_m1	TLE1	Target
Hs00272002_m1	GNB2L1	Target
Hs00272649_s1	TPBG	Target
Hs00273319_m1	FKBP8	Target
Hs00273500_m1	STAT5B	Target
Hs00273561_s1	CD24;CD24L4	Target
Hs00275226_m1	EVL	Target
Hs00275656_m1	GSK3B	Target
Hs00276002_m1	SIVA1	Target
Hs00277090_m1	PIK3CG	Target
Hs00277190_s1	JUN	Target
Hs00286908_m1	KIF21A	Target
Hs00292627_s1	ZMYND8	Target
Hs00332674_m1	UHMK1	Target
Hs00355045_m1	CTNNB1	Target
Hs00355049_m1	CTNNB1	Target
Hs00355782_m1	CDKN1A	Endogenous Control
Hs00356079_m1	GSTM3	Target
Hs00357608_m1	RHOA	Target
Hs00357717_m1	CYC1	Target
Hs00357891_s1	JUNB	Target
Hs00358991_g1	CDK5	Target
Hs00359394_g1	MT3	Target
Hs00359840_m1	SLC2A3	Target
Hs00360961_m1	MAP2K2	Target
Hs00361432_s1	FZD2	Target
Hs00361747_m1	SORT1	Target
Hs00361869_g1	FZD5	Target
Hs00362370_m1	RGS19	Target
Hs00364282_m1	KRAS	Target
Hs00364293_m1	CDK1	Target
Hs00365098_m1	COL6A3	Target
Hs00365249_m1	CDKN2B	Target
Hs00365573_m1	WISP1	Target
Hs00365799_m1	CAMK2B	Target
Hs00365950_g1	HLA-G	Target
Hs00366152_m1	UBE2D2	Endogenous Control
Hs00366278_m1	TNFRSF10B	Target
Hs00366363_m1	CRHR1	Target
Hs00366497_m1	ETV3	Target
Hs00366502_g1	GNB2	Target
Hs00366726_m1	RAD21	Target
Hs00366740_m1	PPIH	Target
Hs00370265_m1	ASNS	Target
Hs00374226_m1	NR4A1	Target
Hs00374280_m1	STAT3	Target
Hs00377726_m1	PTGS1	Target
Hs00379185_m1	MIB1	Target
Hs00381676_m1	MLF1IP	Target
Hs00382884_m1	HSPA4	Target
Hs00382970_m1	PFDN5	Target
Hs00383065_m1	IP6K2	Target
Hs00384387_m1	CDK18	Target
Hs00385075_m1	MAPK3	Target
Hs00387426_m1	MAP2K4	Target
Hs00411505_m1	ASPM	Target
Hs00412445_m1	GCN1L1	Target
Hs00412720_m1	SP1	Target
Hs00413032_m1	TCF3	Target
Hs00413861_m1	KRT9	Target
Hs00415851_g1	CDC20	Target
Hs00416477_m1	TNK2	Target
Hs00426191_m1	HADHA	Target
Hs00426694_m1	AP2B1	Target
Hs00426889_m1	ATP5O	Target
Hs00427214_g1	PCNA	Target
Hs00427274_m1	PRKACA	Target
Hs00427469_m1	RFC4	Target
Hs00427621_m1	TBP	Target
Hs00427993_m1	AGFG1	Target
Hs00428286_g1	ELK1	Target
Hs00428633_m1	TUBA4A	Target
Hs00531110_m1	FAS	Target
Hs00533490_m1	SOD1	Target
Hs00533560_m1	TNFRSF1A	Target
Hs00539278_m1	MYRIP	Target
Hs00559413_m1	ANXA7	Target
Hs00559623_m1	MAPK13	Target
Hs00559804_m1	CAPN1	Target
Hs00560089_m1	TRAM1	Target
Hs00603745_mH	CCT5	Target
Hs00603799_m1	ARMC1	Target
Hs00605457_m1	E2F3	Target
Hs00605615_mH	MAP2K1	Target
Hs00607475_m1	GPR126	Target
Hs00608023_m1	BCL2	Target
Hs00608187_m1	TGFA	Target
Hs00608224_m1	WNT2	Target
Hs00608387_m1	NDRG1	Target
Hs00609073_m1	BRCA2	Target
Hs00609162_m1	EXT1	Target
Hs00609186_m1	GBE1	Target
Hs00609293_g1	HMBS	Target
Hs00609297_m1	HMBS	Endogenous Control
Hs00609566_m1	IGF1R	Target
Hs00609836_m1	AARS	Target
Hs00610263_m1	DVL3	Target
Hs00610314_m1	HDGF	Target
Hs00610318_m1	TGFBR1	Target
Hs00610483_m1	HRAS	Target
Hs00610488_m1	TP53BP2	Target
Hs00705137_s1	IFITM1	Target
Hs00705164_s1	SOCS1	Target
Hs00736972_m1	YES1	Target
Hs00737028_m1	DVL1	Target
Hs00737079_m1	GPR180	Target
Hs00740298_g1	HLA-C	Target
Hs00741586_mH	CDC42	Target
Hs00742533_s1	TUBB2A	Target
Hs00743792_s1	PABPC1	Target
Hs00746337_s1	PRKX	Target
Hs00747110_s1	RHOC	Target
Hs00747379_m1	ID2	Target
Hs00749309_s1	SYNCRIP	Target
Hs00754870_s1	DCN	Target
Hs00757122_m1	DDX10	Target
Hs00757841_m1	MTDH	Target
Hs00761767_s1	KRT19	Target
Hs00762869_s1	PKM2	Target
Hs00765553_m1	CCND1	Target
Hs00765730_m1	NFKB1	Target
Hs00793604_m1	YWHAB	Target
Hs00797747_s1	PFDN4	Target
Hs00799096_s1	RALBP1	Target
Hs00811070_m1	MAX	Target
Hs00818252_g1	KPNA2	Target
Hs00822401_m1	CTSL2	Target
Hs00824723_m1	UBC	Endogenous Control
Hs00829210_s1	MAP2K2;LOC407835	Target
Hs00830226_gH	FTL	Target
Hs00830594_s1	TFDP1	Target
Hs00854538_g1	PA2G4	Target
Hs00854841_g1	DEPDC1	Target
Hs00855044_g1	PHB	Target
Hs00855332_g1	LDHA	Target
Hs00869394_s1	ARHGAP5	Target
Hs00894816_g1	FASTK	Target
Hs00895608_m1	MX1	Target
Hs00898625_g1	YBX1	Target
Hs00899658_m1	MMP1	Target
Hs00900055_m1	VEGFA	Target
Hs00903413_m1	CYP19A1	Target
Hs00905030_m1	MYC	Target
Hs00907398_m1	MCM4	Target
Hs00907966_m1	PIK3CA	Target
Hs00909569_g1	ATF4	Target
Hs00910225_m1	ALB	Target
Hs00911250_m1	CSF1R	Target
Hs00912963_m1	CRAT	Target
Hs00914163_m1	GGH	Target
Hs00914334_m1	LTF	Target
Hs00917067_m1	TXNRD1	Target
Hs00918009_g1	GRB7	Target
Hs00920554_m1	MYB	Target
Hs00923894_m1	CDKN2A	Target
Hs00925195_m1	PRKCA	Target
Hs00927728_m1	PIK3CB	Target
Hs00931450_m1	SLC7A1	Target
Hs00932747_m1	TGFBI	Target
Hs00936301_m1	LRPAP1	Target
Hs00939627_m1	GUSB	Target
Hs00942543_m1	MYBL2	Target
Hs00943178_g1	PGK1	Target
Hs00943652_m1	ABL2	Target
Hs00944025_m1	CEACAM5	Target
Hs00944794_m1	CTNNA1	Target
Hs00945948_m1	RFC2	Target
Hs00946084_g1	HSPA5	Target
Hs00947433_m1	CTSB	Target
Hs00947994_m1	CDC25A	Target
Hs00950344_m1	SNAI2	Target
Hs00951083_m1	TFRC	Target
Hs00951941_m1	ETV1	Target
Hs00952642_m1	ANPEP	Target
Hs00953523_m1	MSH2	Target
Hs00955525_m1	ERBB4	Target
Hs00955802_m1	RPN2	Target
Hs00959834_m1	XRCC1	Target
Hs00960227_m1	MS4A7	Target
Hs00960942_m1	SPP1	Target
Hs00961554_m1	INSR	Target
Hs00961748_m1	TNFRSF1B	Target
Hs00962908_m1	THBS1	Target
Hs00963605_m1	TFDP2	Target
Hs00964426_m1	PDGFA	Target
Hs00964965_m1	TUBB3	Target
Hs00965587_m1	SLC20A1	Target
Hs00965889_m1	NOTCH4	Target
Hs00966302_m1	NF2	Target
Hs00966522_m1	PDGFB	Target
Hs00968295_m1	MMP11	Target
Hs00968308_m1	MMP3	Target
Hs00968436_m1	REL	Target
Hs00968567_s1	SFN	Target
Hs00969289_m1	BNIP3	Target
Hs00969569_m1	ATP5B	Endogenous Control
Hs00971475_m1	HSPH1	Target
Hs00977140_m1	RARB	Target
Hs00978565_m1	DTL	Target
Hs00981572_m1	RAB6B	Target
Hs00982607_m1	NINJ1	Target
Hs00983323_m1	FBP1	Target
Hs00984230_m1	B2M	Target
Hs00985157_m1	UCHL1	Target
Hs00988717_m1	ABCC4	Target
Hs00989970_m1	PRKCQ	Target
Hs00990023_m1	RAD50	Target
Hs00990732_m1	CD34	Target
Hs00991290_m1	RAB5A	Target
Hs00995282_g1	XRCC6	Target
Hs00997938_m1	GSK3A	Target
Hs00998018_m1	PDGFRA	Target
Hs00998133_m1	TGFB1	Target
Hs00998426_m1	CAPNS1	Target
Hs00998537_m1	WNT5A	Target
Hs01001469_m1	ITGB3	Target
Hs01001580_m1	ERBB2	Target
Hs01003267_m1	HPRT1	Endogenous Control
Hs01008571_m1	LCN2	Target
Hs01009038_m1	TCF7L2	Target
Hs01013123_m1	STAT2	Target
Hs01013989_m1	STAT1	Target
Hs01014511_m1	TLR2	Target
Hs01016789_m1	EZH2	Target
Hs01018151_m1	CASP8	Target
Hs01019082_mH	VDAC1	Target
Hs01020031_m1	MMP28	Target
Hs01020073_m1	TRIP13	Target
Hs01023087_m1	DHCR7	Target
Hs01023894_m1	CDH1	Target
Hs01025984_m1	RAC1	Target
Hs01026536_m1	CCNE1	Target
Hs01026983_m1	JAK1	Target
Hs01027360_g1	PSMA1	Target
Hs01027515_gH	STMN1	Target
Hs01028811_g1	EIF5	Target
Hs01030097_m1	CCNB1	Target
Hs01032443_m1	MKI67	Target
Hs01032845_m1	SEPP1	Target
Hs01032884_m1	RAC2	Target
Hs01033129_m1	STMN1	Target
Hs01034249_m1	TP53	Target
Hs01037584_m1	AP2M1	Target
Hs01040726_m1	DCK	Target
Hs01042010_m1	RELA	Target
Hs01042313_m1	TNFRSF1A	Target
Hs01045418_m1	SKIL	Target
Hs01046616_m1	TMEM45A	Target
Hs01047580_m1	STAT3	Target
Hs01048812_g1	CKS2	Target
Hs01050719_m1	NOTCH2	Target
Hs01052296_m1	IGFBP5	Target
Hs01052961_m1	FLT1	Target
Hs01053790_m1	ABCG2	Target
Hs01054576_m1	FOXO1	Target
Hs01055971_m1	LAMB1	Target
Hs01061576_m1	DHRS2	Target
Hs01062014_m1	NOTCH1	Target
Hs01062125_m1	TK1	Target
Hs01063168_m1	AXIN2	Target
Hs01064444_m1	AXL	Target
Hs01070442_m1	SPINT2	Target
Hs01072069_g1	RRM2	Target
Hs01072206_m1	RAB27B	Target
Hs01075861_m1	CD44	Target
Hs01076078_m1	EGFR	Target
Hs01078066_m1	RB1	Target
Hs01085579_m1	EIF2C2	Target
Hs01085691_m1	PTN	Target
Hs01086000_m1	TGFB3	Target
Hs01087307_m1	KLK13	Target
Hs01090047_m1	PRKCD	Target
Hs01090242_m1	SMO	Target
Hs01091564_m1	MCM2	Target
Hs01092205_g1	RAP1A	Target
Hs01093019_m1	GSPT1	Target
Hs01098873_m1	COL4A2	Target
Hs01099594_m1	BMP6	Target
Hs01099999_m1	EGF	Target
Hs01103749_m1	WT1	Target
Hs01104728_m1	ABL1	Target
Hs01106440_m1	MELK	Target
Hs01108847_m1	MMP17	Target
Hs01112307_m1	ATM	Target
Hs01114253_m1	TGFBR3	Target
Hs01115513_m1	PPARG	Target
Hs01117001_m1	CUL1	Endogenous Control
Hs01120030_m1	RET	Target
Hs01121102_g1	MAPRE1	Target
Hs01121709_m1	TSG101	Target
Hs01122781_m1	KIF3B	Target
Hs01124302_m1	M6PR	Target
Hs01125548_m1	UBE2L6	Target
Hs01547282_m1	IRF3	Target
Hs01548508_m1	MAPK8	Target
Hs01548727_m1	MMP2	Target
Hs01548894_m1	CDK2	Target
Hs01549976_m1	FN1	Target
Hs01550934_m1	CDC25B	Target
Hs01551876_m1	TJP1	Target
Hs01554450_m1	ERCC3	Target
Hs01554513_g1	MAD2L1	Target
Hs01555410_m1	IL1B	Target
Hs01556193_m1	BRCA1	Target
Hs01556702_m1	PGR	Target
Hs01568269_m1	APC	Target
Hs01568507_g1	RBBP4	Target
Hs01573874_g1	NME3	Target
Hs01582072_m1	AURKA	Target
Hs01588973_m1	CYCS	Target
Hs01591130_m1	TRRAP	Target
Hs01635324_s1	HMGN2	Target
Hs01652418_m1	COX7A2	Target
Hs01652468_g1	PGAM1	Target
Hs01683591_g1	HSPA8	Target
Hs01888362_g1	H2AFZ	Target
Hs01902432_s1	RAC1	Target
Hs01910190_s1	CARD17	Target
Hs01920617_s1	PRNP	Target
Hs01920652_s1	PTEN	Target
Hs01921749_s1	SPRY2	Target
Hs01941416_g1	KRT18	Target
Hs02330233_u1	JUND	Target
Hs02330328_s1	SOCS3	Target
Hs02339479_g1	NPM1	Target
Hs02339492_g1	PTMA	Target
Hs02621161_s1	NME1	Target
Hs02621185_s1	HDAC1	Target
Hs02621230_s1	PTEN	Target
Hs02621289_g1	TPT1	Target
Hs02741908_m1	INS	Target
Hs03044127_g1	HSPB1	Target
Hs03044281_g1	YWHAZ	Target
Hs03044902_g1	PRDX2	Target
Hs03063352_s1	BIRC5	Target
Hs03070834_m1	FBXO5	Target
Hs03676575_s1	ID1	Target
Hs03929097_g1	GAPDH	Target
Hs03986111_s1	TOB1	Target
Hs04194521_s1	PPIA	Target
Hs99999003_m1	MYC	Target
Hs99999008_m1	MDM2	Target
Hs99999018_m1	BCL2	Target
Hs99999141_s1	JUN	Target
Hs99999188_m1	CCNB1	Target
Hs99999901_s1	18S	Endogenous Control
Hs99999902_m1	RPLP0	Endogenous Control
Hs99999903_m1	ACTB	Endogenous Control
Hs99999904_m1	PPIA	Endogenous Control
Hs99999905_m1	GAPDH	Endogenous Control
Hs99999906_m1	PGK1	Endogenous Control
Hs99999907_m1	B2M	Endogenous Control
Hs99999908_m1	GUSB	Endogenous Control
Hs99999909_m1	HPRT1	Endogenous Control
Hs99999910_m1	TBP	Endogenous Control
Hs99999911_m1	TFRC	Endogenous Control

## Sheet: Plate layout
TaqMan® OpenArray® Human Cancer Panel, QuantStudio™ 12K Flex
	3 x 4 subarrays are repeated 4 times on the plate										2										3
A		1	2	3	4	5	6	7	8			1	2	3	4	5	6	7	8			1	2	3	4	5	6	7	8
	a	Hs00152928_m1	Hs00157731_m1	Hs00152939_m1	Hs00159081_m1	Hs00152973_m1	Hs00159210_m1	Hs00153138_m1	Hs00159627_m1		a	Hs00153280_m1	Hs00161707_m1	Hs00153353_m1	Hs00161826_m1	Hs00153418_m1	Hs00163506_m1	Hs00153510_m1	Hs00164004_m1		a	Hs00154208_m1	Hs00164940_m1	Hs00155479_m1	Hs00166071_m1	Hs00156454_m1	Hs00166223_m1	Hs00157163_m1	Hs00166467_m1
	b	Hs00176628_m1	Hs00178455_m1	Hs00176815_m1	Hs00178494_m1	Hs00176884_m1	Hs00178726_m1	Hs00176973_m1	Hs00178914_m1		b	Hs00177010_m1	Hs00179683_m1	Hs00177051_m1	Hs00179845_m1	Hs00177464_m1	Hs00180127_m1	Hs00177522_m1	Hs00180288_m1		b	Hs00177766_m1	Hs00180437_m1	Hs00177821_m1	Hs00180529_m1	Hs00178289_m1	Hs00180562_m1	Hs00178340_m1	Hs00181051_m1
	c	Hs00197646_m1	Hs00220393_m1	Hs00197982_m1	Hs00221499_m1	Hs00198320_m1	Hs00221707_m1	Hs00199831_m1	Hs00229135_m1		c	Hs00201046_m1	Hs00231092_m1	Hs00202756_m1	Hs00231279_m1	Hs00204205_m1	Hs00231535_m1	Hs00205182_m1	Hs00231838_m1		c	Hs00208408_m1	Hs00232013_m1	Hs00212390_m1	Hs00232399_m1	Hs00216455_m1	Hs00233492_m1	Hs00220127_m1	Hs00233790_m1
	d	Hs00269944_m1	Hs00357717_m1	Hs00270282_m1	Hs00358991_g1	Hs00270514_m1	Hs00359840_m1	Hs00272002_m1	Hs00361432_s1		d	Hs00273319_m1	Hs00361869_g1	Hs00273561_s1	Hs00364282_m1	Hs00275656_m1	Hs00365098_m1	Hs00277090_m1	Hs00365573_m1		d	Hs00286908_m1	Hs00365950_g1	Hs00332674_m1	Hs00366278_m1	Hs00355049_m1	Hs00366497_m1	Hs00356079_m1	Hs00366726_m1
	e	Hs00609186_m1	Hs00757122_m1	Hs00609297_m1	Hs00761767_s1	Hs00609836_m1	Hs00765553_m1	Hs00610314_m1	Hs00793604_m1		e	Hs00610483_m1	Hs00799096_s1	Hs00705137_s1	Hs00818252_g1	Hs00736972_m1	Hs00824723_m1	Hs00737079_m1	Hs00829210_s1		e	Hs00741586_mH	Hs00830594_s1	Hs00743792_s1	Hs00854841_g1	Hs00747110_s1	Hs00855332_g1	Hs00749309_s1	Hs00894816_g1
	f	Hs00965587_m1	Hs00997938_m1	Hs00966302_m1	Hs00998133_m1	Hs00968295_m1	Hs00998537_m1	Hs00968436_m1	Hs01001580_m1		f	Hs00969289_m1	Hs01008571_m1	Hs00971475_m1	Hs01013123_m1	Hs00978565_m1	Hs01014511_m1	Hs00982607_m1	Hs01018151_m1		f	Hs00984230_m1	Hs01020031_m1	Hs00988717_m1	Hs01023087_m1	Hs00990023_m1	Hs01025984_m1	Hs00991290_m1	Hs01026983_m1
	g			Hs01106440_m1	Hs01547282_m1	Hs01112307_m1	Hs01548727_m1				g			Hs01115513_m1	Hs01549976_m1	Hs01120030_m1	Hs01551876_m1				g			Hs01121709_m1	Hs01554513_g1	Hs01124302_m1	Hs01556193_m1
	h			Hs03044127_g1	Hs99999906_m1	Hs03044902_g1	Hs99999908_m1				h			Hs04194521_s1	Hs99999909_m1	Hs99999008_m1	Hs99999910_m1				h			Empty	Empty	Empty	Empty
B		1	2	3	4	5	6	7	8			1	2	3	4	5	6	7	8			1	2	3	4	5	6	7	8
	a	Hs00168547_m1	Hs00173503_m1	Hs00169407_m1	Hs00173742_m1	Hs00169714_m1	Hs00174029_m1	Hs00170630_m1	Hs00174141_m1		a	Hs00170780_m1	Hs00174297_m1	Hs00171132_m1	Hs00174517_m1	Hs00171172_m1	Hs00174819_m1	Hs00171254_m1	Hs00174877_m1		a	Hs00171558_m1	Hs00175188_m1	Hs00171832_m1	Hs00175938_m1	Empty	Hs00176222_m1	Hs00172895_m1	Hs00176481_m1
	b	Hs00181419_m1	Hs00186689_m1	Hs00181767_m1	Hs00188713_m1	Hs00182059_m1	Hs00191535_m1	Hs00182192_m1	Hs00191882_m1		b	Hs00182370_m1	Hs00192399_m1	Hs00182896_m1	Hs00192581_m1	Hs00183573_m1	Hs00193920_m1	Hs00183953_m1	Hs00195432_m1		b	Hs00184500_m1	Hs00195612_m1	Hs00185574_m1	Hs00196132_m1	Hs00186374_m1	Hs00196542_m1	Hs00186447_m1	Hs00197328_m1
	c	Hs00234119_m1	Hs00247620_m1	Hs00234244_m1	Hs00248408_m1	Hs00234508_m1	Hs00253876_m1	Hs00234753_m1	Hs00255374_m1		c	Hs00236216_m1	Hs00259932_m1	Hs00236810_m1	Hs00262861_m1	Hs00236949_m1	Hs00264721_m1	Hs00237119_m1	Hs00266592_m1		c	Hs00241497_m1	Hs00267597_m1	Hs00242386_m1	Hs00268847_m1	Hs00242993_m1	Hs00269428_m1	Hs00243327_m1	Hs00269500_m1
	d	Hs00370265_m1	Hs00427469_m1	Hs00374280_m1	Hs00427993_m1	Hs00379185_m1	Hs00428633_m1	Hs00382884_m1	Hs00533490_m1		d	Hs00383065_m1	Hs00539278_m1	Hs00385075_m1	Hs00559623_m1	Hs00411505_m1	Hs00560089_m1	Hs00412720_m1	Hs00603799_m1		d	Hs00413861_m1	Hs00605615_mH	Hs00416477_m1	Hs00608023_m1	Hs00426694_m1	Hs00608224_m1	Hs00427214_g1	Hs00609073_m1
	e	Hs00898625_g1	Hs00943178_g1	Hs00900055_m1	Hs00944025_m1	Hs00905030_m1	Hs00945948_m1	Hs00907966_m1	Hs00947433_m1		e	Hs00910225_m1	Hs00950344_m1	Hs00912963_m1	Hs00951941_m1	Hs00914334_m1	Hs00953523_m1	Hs00918009_g1	Hs00955802_m1		e	Hs00923894_m1	Hs00960227_m1	Hs00927728_m1	Hs00961554_m1	Hs00932747_m1	Hs00962908_m1	Hs00939627_m1	Hs00964426_m1
	f	Hs01027515_gH	Hs01062125_m1	Hs01030097_m1	Hs01064444_m1	Hs01032845_m1	Hs01072069_g1	Hs01033129_m1	Hs01075861_m1		f	Hs01037584_m1	Hs01078066_m1	Hs01042010_m1	Hs01085579_m1	Hs01045418_m1	Hs01086000_m1	Hs01047580_m1	Hs01090047_m1		f	Hs01050719_m1	Hs01091564_m1	Hs01052961_m1	Hs01093019_m1	Hs01054576_m1	Hs01099594_m1	Hs01061576_m1	Hs01103749_m1
	g			Hs01568269_m1	Hs01910190_s1	Hs01573874_g1	Hs01920652_s1				g			Hs01588973_m1	Hs01941416_g1	Hs01635324_s1	Hs02330328_s1				g			Hs01652468_g1	Hs02339492_g1	Hs01888362_g1	Hs02621185_s1
	h			Hs03070834_m1	Hs02621289_g1	Empty	Empty				h			Hs99999141_s1	Hs03929097_g1	Empty	Empty				h			Hs99999905_m1	Hs99999901_s1	Empty	Empty
C		1	2	3	4	5	6	7	8			1	2	3	4	5	6	7	8			1	2	3	4	5	6	7	8
	a	Hs00152933_m1	Hs00157817_m1	Hs00152971_m1	Hs00159092_m1	Hs00153074_m1	Hs00159600_m1	Hs00153277_m1	Hs00160947_m1		a	Hs00153294_m1	Hs00161719_m1	Hs00153380_m1	Hs00162613_m1	Hs00153451_m1	Hs00163761_m1	Hs00154054_m1	Hs00164932_m1		a	Hs00154457_m1	Hs00165949_m1	Hs00156411_m1	Hs00166169_m1	Hs00156455_m1	Hs00166294_m1	Hs00157213_m1	Hs00167402_m1
	b	Hs00176719_m1	Hs00178463_m1	Hs00176839_m1	Hs00178500_m1	Hs00176966_m1	Hs00178837_m1	Hs00176998_m1	Hs00179382_m1		b	Hs00177037_m1	Hs00179843_m1	Hs00177357_m1	Hs00180035_m1	Hs00177481_m1	Hs00180269_m1	Hs00177708_m1	Hs00180312_m1		b	Hs00177774_m1	Hs00180450_m1	Hs00177957_m1	Hs00180533_m1	Hs00178297_m1	Hs00180679_m1	Hs00178427_m1	Hs00181211_m1
	c	Hs00197856_m1	Hs00221277_m1	Hs00198091_m1	Hs00221664_m1	Hs00198887_m1	Hs00225132_m1	Hs00200720_m1	Hs00230762_m1		c	Hs00201226_m1	Hs00231101_m1	Hs00204173_m1	Hs00231476_m1	Hs00204876_m1	Hs00231780_m1	Hs00205854_m1	Hs00231908_m1		c	Hs00211096_m1	Hs00232074_m1	Hs00212828_m1	Hs00232479_m1	Hs00217947_m1	Hs00233722_m1	Hs00220348_m1	Hs00234046_m1
	d	Hs00269977_m1	Hs00357891_s1	Hs00270424_m1	Hs00359394_g1	Hs00270768_m1	Hs00360961_m1	Hs00272649_s1	Hs00361747_m1		d	Hs00273500_m1	Hs00362370_m1	Hs00275226_m1	Hs00364293_m1	Hs00276002_m1	Hs00365249_m1	Hs00277190_s1	Hs00365799_m1		d	Hs00292627_s1	Hs00366152_m1	Hs00355045_m1	Hs00366363_m1	Hs00355782_m1	Hs00366502_g1	Hs00357608_m1	Hs00366740_m1
	e	Hs00609293_g1	Hs00757841_m1	Hs00609566_m1	Hs00762869_s1	Hs00610263_m1	Hs00765730_m1	Hs00610318_m1	Hs00797747_s1		e	Hs00610488_m1	Hs00811070_m1	Hs00705164_s1	Hs00822401_m1	Hs00737028_m1	Empty	Hs00740298_g1	Hs00830226_gH		e	Hs00742533_s1	Hs00854538_g1	Hs00746337_s1	Hs00855044_g1	Hs00747379_m1	Hs00869394_s1	Hs00754870_s1	Hs00895608_m1
	f	Hs00965889_m1	Hs00998018_m1	Hs00966522_m1	Hs00998426_m1	Hs00968308_m1	Hs01001469_m1	Hs00968567_s1	Hs01003267_m1		f	Hs00969569_m1	Hs01009038_m1	Hs00977140_m1	Hs01013989_m1	Hs00981572_m1	Hs01016789_m1	Hs00983323_m1	Hs01019082_mH		f	Hs00985157_m1	Hs01020073_m1	Hs00989970_m1	Hs01023894_m1	Hs00990732_m1	Hs01026536_m1	Hs00995282_g1	Hs01027360_g1
	g			Hs01108847_m1	Hs01548508_m1	Hs01114253_m1	Hs01548894_m1				g			Hs01117001_m1	Hs01550934_m1	Hs01121102_g1	Hs01554450_m1				g			Hs01122781_m1	Hs01555410_m1	Hs01125548_m1	Hs01556702_m1
	h			Hs03044281_g1	Hs99999907_m1	Hs03063352_s1	Empty				h			Hs99999003_m1	Empty	Hs99999018_m1	Hs99999911_m1				h			Hs99999903_m1	Empty	Hs99999904_m1	Empty
D		1	2	3	4	5	6	7	8			1	2	3	4	5	6	7	8			1	2	3	4	5	6	7	8
	a	Hs00169258_m1	Hs00173611_m1	Hs00169491_m1	Hs00173872_m1	Hs00169777_m1	Hs00174128_m1	Hs00170723_m1	Hs00174164_m1		a	Hs00171022_m1	Hs00174474_m1	Hs00171165_m1	Hs00174674_m1	Hs00171191_m1	Hs00174860_m1	Hs00171375_m1	Hs00174970_m1		a	Hs00171656_m1	Hs00175935_m1	Hs00172187_m1	Hs00176119_m1	Hs00172870_m1	Hs00176258_m1	Hs00173072_m1	Hs00176538_m1
	b	Hs00181605_m1	Hs00187740_m1	Hs00181881_m1	Hs00189535_m1	Hs00182082_m1	Hs00191583_m1	Hs00182314_m1	Hs00192202_m1		b	Hs00182558_m1	Hs00192574_m1	Hs00183533_m1	Hs00193725_m1	Hs00183624_m1	Hs00194421_m1	Hs00184427_m1	Hs00195504_m1		b	Hs00185390_m1	Hs00196101_m1	Hs00185584_m1	Hs00196146_m1	Hs00186419_m1	Hs00196708_m1	Hs00186495_m1	Hs00197394_m1
	c	Hs00234140_m1	Hs00248075_m1	Hs00234253_m1	Hs00248563_m1	Hs00234579_m1	Hs00254392_m1	Hs00234864_m1	Hs00255603_m1		c	Hs00236329_m1	Hs00259967_m1	Hs00236884_m1	Hs00263393_m1	Hs00237047_m1	Hs00264877_m1	Hs00241111_m1	Hs00267157_s1		c	Hs00241844_m1	Hs00268060_m1	Hs00242728_m1	Hs00268954_s1	Hs00243140_m1	Hs00269492_m1	Hs00243533_m1	Hs00269660_s1
	d	Hs00374226_m1	Hs00427621_m1	Hs00377726_m1	Hs00428286_g1	Hs00381676_m1	Hs00531110_m1	Hs00382970_m1	Hs00533560_m1		d	Hs00384387_m1	Hs00559413_m1	Hs00387426_m1	Hs00559804_m1	Hs00412445_m1	Hs00603745_mH	Hs00413032_m1	Hs00605457_m1		d	Hs00415851_g1	Hs00607475_m1	Hs00426191_m1	Hs00608187_m1	Hs00426889_m1	Hs00608387_m1	Hs00427274_m1	Hs00609162_m1
	e	Hs00899658_m1	Hs00943652_m1	Hs00903413_m1	Hs00944794_m1	Hs00907398_m1	Hs00946084_g1	Hs00909569_g1	Hs00947994_m1		e	Hs00911250_m1	Hs00951083_m1	Hs00914163_m1	Hs00952642_m1	Hs00917067_m1	Hs00955525_m1	Hs00920554_m1	Hs00959834_m1		e	Hs00925195_m1	Hs00960942_m1	Hs00931450_m1	Hs00961748_m1	Hs00936301_m1	Hs00963605_m1	Hs00942543_m1	Hs00964965_m1
	f	Hs01028811_g1	Hs01063168_m1	Hs01032443_m1	Hs01070442_m1	Hs01032884_m1	Hs01072206_m1	Hs01034249_m1	Hs01076078_m1		f	Hs01040726_m1	Empty	Hs01042313_m1	Hs01085691_m1	Hs01046616_m1	Hs01087307_m1	Hs01048812_g1	Hs01090242_m1		f	Hs01052296_m1	Hs01092205_g1	Hs01053790_m1	Hs01098873_m1	Hs01055971_m1	Hs01099999_m1	Hs01062014_m1	Hs01104728_m1
	g			Hs01568507_g1	Hs01920617_s1	Hs01582072_m1	Hs01921749_s1				g			Hs01591130_m1	Hs02330233_u1	Hs01652418_m1	Hs02339479_g1				g			Hs01683591_g1	Hs02621161_s1	Hs01902432_s1	Hs02621230_s1
	h			Hs03676575_s1	Hs02741908_m1	Empty	Empty				h			Hs99999188_m1	Hs03986111_s1	Empty	Empty				h			Empty	Hs99999902_m1	Empty	Empty

## Sheet: Array locations
TaqMan® OpenArray® Human Cancer Panel, QuantStudio™ 12K Flex
Assay.Assay ID	Gene
Hs00152928_m1	EGR1
Hs00157731_m1	GNAZ
Hs00152939_m1	TLR4
Hs00159081_m1	MATN3
Hs00152973_m1	TLR9
Hs00159210_m1	MNDA
Hs00153138_m1	CCNA2
Hs00159627_m1	NMBR
Hs00176628_m1	FYN
Hs00178455_m1	PRKCE
Hs00176815_m1	PAK1
Hs00178494_m1	SRC
Hs00176884_m1	PDPK1
Hs00178726_m1	MAP3K5
Hs00176973_m1	PRKCA
Hs00178914_m1	PRKCD
Hs00197646_m1	TBL3
Hs00220393_m1	MGST1
Hs00197982_m1	BCL2L11
Hs00221499_m1	KAT2A
Hs00198320_m1	PLK2
Hs00221707_m1	XRCC5
Hs00199831_m1	ESM1
Hs00229135_m1	WNT3
Hs00269944_m1	BRAF
Hs00357717_m1	CYC1
Hs00270282_m1	STX1A
Hs00358991_g1	CDK5
Hs00270514_m1	LONP1
Hs00359840_m1	SLC2A3
Hs00272002_m1	GNB2L1
Hs00361432_s1	FZD2
Hs00609186_m1	GBE1
Hs00757122_m1	DDX10
Hs00609297_m1	HMBS
Hs00761767_s1	KRT19
Hs00609836_m1	AARS
Hs00765553_m1	CCND1
Hs00610314_m1	HDGF
Hs00793604_m1	YWHAB
Hs00965587_m1	SLC20A1
Hs00997938_m1	GSK3A
Hs00966302_m1	NF2
Hs00998133_m1	TGFB1
Hs00968295_m1	MMP11
Hs00998537_m1	WNT5A
Hs00968436_m1	REL
Hs01001580_m1	ERBB2
Hs01106440_m1	MELK
Hs01547282_m1	IRF3
Hs01112307_m1	ATM
Hs01548727_m1	MMP2
Hs03044127_g1	HSPB1
Hs99999906_m1	PGK1
Hs03044902_g1	PRDX2
Hs99999908_m1	GUSB
Hs00153280_m1	TP53I3
Hs00161707_m1	SKI
Hs00153353_m1	BIRC5
Hs00161826_m1	SLC16A1
Hs00153418_m1	RAD51
Hs00163506_m1	ACADS
Hs00153510_m1	MME
Hs00164004_m1	COL1A1
Hs00177010_m1	PRKCG
Hs00179683_m1	STK32B
Hs00177051_m1	PRKCZ
Hs00179845_m1	MET
Hs00177464_m1	TYK2
Hs00180127_m1	DEK
Hs00177522_m1	CDC42BPA
Hs00180288_m1	CBLB
Hs00201046_m1	HYAL1
Hs00231092_m1	E2F5
Hs00202756_m1	SEC14L2
Hs00231279_m1	REL
Hs00204205_m1	ATAD2
Hs00231535_m1	CNBP
Hs00205182_m1	SND1
Hs00231838_m1	MLLT10
Hs00273319_m1	FKBP8
Hs00361869_g1	FZD5
Hs00273561_s1	CD24;CD24L4
Hs00364282_m1	KRAS
Hs00275656_m1	GSK3B
Hs00365098_m1	COL6A3
Hs00277090_m1	PIK3CG
Hs00365573_m1	WISP1
Hs00610483_m1	HRAS
Hs00799096_s1	RALBP1
Hs00705137_s1	IFITM1
Hs00818252_g1	KPNA2
Hs00736972_m1	YES1
Hs00824723_m1	UBC
Hs00737079_m1	GPR180
Hs00829210_s1	MAP2K2;LOC407835
Hs00969289_m1	BNIP3
Hs01008571_m1	LCN2
Hs00971475_m1	HSPH1
Hs01013123_m1	STAT2
Hs00978565_m1	DTL
Hs01014511_m1	TLR2
Hs00982607_m1	NINJ1
Hs01018151_m1	CASP8
Hs01115513_m1	PPARG
Hs01549976_m1	FN1
Hs01120030_m1	RET
Hs01551876_m1	TJP1
Hs04194521_s1	PPIA
Hs99999909_m1	HPRT1
Hs99999008_m1	MDM2
Hs99999910_m1	TBP
Hs00154208_m1	CA9
Hs00164940_m1	IDUA
Hs00155479_m1	CYR61
Hs00166071_m1	BLMH
Hs00156454_m1	CEBPG
Hs00166223_m1	IFNGR1
Hs00157163_m1	CTPS
Hs00166467_m1	OXCT1
Hs00177766_m1	CDKL1
Hs00180437_m1	DCC
Hs00177821_m1	BUB1
Hs00180529_m1	WNT1
Hs00178289_m1	AKT1
Hs00180562_m1	RBL2
Hs00178340_m1	FGR
Hs00181051_m1	APC
Hs00208408_m1	KIF14
Hs00232013_m1	FOSL2
Hs00212390_m1	LEF1
Hs00232399_m1	RELB
Hs00216455_m1	ECT2
Hs00233492_m1	CANX
Hs00220127_m1	MCCC1
Hs00233790_m1	ITGAV
Hs00286908_m1	KIF21A
Hs00365950_g1	HLA-G
Hs00332674_m1	UHMK1
Hs00366278_m1	TNFRSF10B
Hs00355049_m1	CTNNB1
Hs00366497_m1	ETV3
Hs00356079_m1	GSTM3
Hs00366726_m1	RAD21
Hs00741586_mH	CDC42
Hs00830594_s1	TFDP1
Hs00743792_s1	PABPC1
Hs00854841_g1	DEPDC1
Hs00747110_s1	RHOC
Hs00855332_g1	LDHA
Hs00749309_s1	SYNCRIP
Hs00894816_g1	FASTK
Hs00984230_m1	B2M
Hs01020031_m1	MMP28
Hs00988717_m1	ABCC4
Hs01023087_m1	DHCR7
Hs00990023_m1	RAD50
Hs01025984_m1	RAC1
Hs00991290_m1	RAB5A
Hs01026983_m1	JAK1
Hs01121709_m1	TSG101
Hs01554513_g1	MAD2L1
Hs01124302_m1	M6PR
Hs01556193_m1	BRCA1
Hs00152928_m1	EGR1
Hs00157731_m1	GNAZ
Hs00152939_m1	TLR4
Hs00159081_m1	MATN3
Hs00152973_m1	TLR9
Hs00159210_m1	MNDA
Hs00153138_m1	CCNA2
Hs00159627_m1	NMBR
Hs00176628_m1	FYN
Hs00178455_m1	PRKCE
Hs00176815_m1	PAK1
Hs00178494_m1	SRC
Hs00176884_m1	PDPK1
Hs00178726_m1	MAP3K5
Hs00176973_m1	PRKCA
Hs00178914_m1	PRKCD
Hs00197646_m1	TBL3
Hs00220393_m1	MGST1
Hs00197982_m1	BCL2L11
Hs00221499_m1	KAT2A
Hs00198320_m1	PLK2
Hs00221707_m1	XRCC5
Hs00199831_m1	ESM1
Hs00229135_m1	WNT3
Hs00269944_m1	BRAF
Hs00357717_m1	CYC1
Hs00270282_m1	STX1A
Hs00358991_g1	CDK5
Hs00270514_m1	LONP1
Hs00359840_m1	SLC2A3
Hs00272002_m1	GNB2L1
Hs00361432_s1	FZD2
Hs00609186_m1	GBE1
Hs00757122_m1	DDX10
Hs00609297_m1	HMBS
Hs00761767_s1	KRT19
Hs00609836_m1	AARS
Hs00765553_m1	CCND1
Hs00610314_m1	HDGF
Hs00793604_m1	YWHAB
Hs00965587_m1	SLC20A1
Hs00997938_m1	GSK3A
Hs00966302_m1	NF2
Hs00998133_m1	TGFB1
Hs00968295_m1	MMP11
Hs00998537_m1	WNT5A
Hs00968436_m1	REL
Hs01001580_m1	ERBB2
Hs01106440_m1	MELK
Hs01547282_m1	IRF3
Hs01112307_m1	ATM
Hs01548727_m1	MMP2
Hs03044127_g1	HSPB1
Hs99999906_m1	PGK1
Hs03044902_g1	PRDX2
Hs99999908_m1	GUSB
Hs00153280_m1	TP53I3
Hs00161707_m1	SKI
Hs00153353_m1	BIRC5
Hs00161826_m1	SLC16A1
Hs00153418_m1	RAD51
Hs00163506_m1	ACADS
Hs00153510_m1	MME
Hs00164004_m1	COL1A1
Hs00177010_m1	PRKCG
Hs00179683_m1	STK32B
Hs00177051_m1	PRKCZ
Hs00179845_m1	MET
Hs00177464_m1	TYK2
Hs00180127_m1	DEK
Hs00177522_m1	CDC42BPA
Hs00180288_m1	CBLB
Hs00201046_m1	HYAL1
Hs00231092_m1	E2F5
Hs00202756_m1	SEC14L2
Hs00231279_m1	REL
Hs00204205_m1	ATAD2
Hs00231535_m1	CNBP
Hs00205182_m1	SND1
Hs00231838_m1	MLLT10
Hs00273319_m1	FKBP8
Hs00361869_g1	FZD5
Hs00273561_s1	CD24;CD24L4
Hs00364282_m1	KRAS
Hs00275656_m1	GSK3B
Hs00365098_m1	COL6A3
Hs00277090_m1	PIK3CG
Hs00365573_m1	WISP1
Hs00610483_m1	HRAS
Hs00799096_s1	RALBP1
Hs00705137_s1	IFITM1
Hs00818252_g1	KPNA2
Hs00736972_m1	YES1
Hs00824723_m1	UBC
Hs00737079_m1	GPR180
Hs00829210_s1	MAP2K2;LOC407835
Hs00969289_m1	BNIP3
Hs01008571_m1	LCN2
Hs00971475_m1	HSPH1
Hs01013123_m1	STAT2
Hs00978565_m1	DTL
Hs01014511_m1	TLR2
Hs00982607_m1	NINJ1
Hs01018151_m1	CASP8
Hs01115513_m1	PPARG
Hs01549976_m1	FN1
Hs01120030_m1	RET
Hs01551876_m1	TJP1
Hs04194521_s1	PPIA
Hs99999909_m1	HPRT1
Hs99999008_m1	MDM2
Hs99999910_m1	TBP
Hs00154208_m1	CA9
Hs00164940_m1	IDUA
Hs00155479_m1	CYR61
Hs00166071_m1	BLMH
Hs00156454_m1	CEBPG
Hs00166223_m1	IFNGR1
Hs00157163_m1	CTPS
Hs00166467_m1	OXCT1
Hs00177766_m1	CDKL1
Hs00180437_m1	DCC
Hs00177821_m1	BUB1
Hs00180529_m1	WNT1
Hs00178289_m1	AKT1
Hs00180562_m1	RBL2
Hs00178340_m1	FGR
Hs00181051_m1	APC
Hs00208408_m1	KIF14
Hs00232013_m1	FOSL2
Hs00212390_m1	LEF1
Hs00232399_m1	RELB
Hs00216455_m1	ECT2
Hs00233492_m1	CANX
Hs00220127_m1	MCCC1
Hs00233790_m1	ITGAV
Hs00286908_m1	KIF21A
Hs00365950_g1	HLA-G
Hs00332674_m1	UHMK1
Hs00366278_m1	TNFRSF10B
Hs00355049_m1	CTNNB1
Hs00366497_m1	ETV3
Hs00356079_m1	GSTM3
Hs00366726_m1	RAD21
Hs00741586_mH	CDC42
Hs00830594_s1	TFDP1
Hs00743792_s1	PABPC1
Hs00854841_g1	DEPDC1
Hs00747110_s1	RHOC
Hs00855332_g1	LDHA
Hs00749309_s1	SYNCRIP
Hs00894816_g1	FASTK
Hs00984230_m1	B2M
Hs01020031_m1	MMP28
Hs00988717_m1	ABCC4
Hs01023087_m1	DHCR7
Hs00990023_m1	RAD50
Hs01025984_m1	RAC1
Hs00991290_m1	RAB5A
Hs01026983_m1	JAK1
Hs01121709_m1	TSG101
Hs01554513_g1	MAD2L1
Hs01124302_m1	M6PR
Hs01556193_m1	BRCA1
Hs00152928_m1	EGR1
Hs00157731_m1	GNAZ
Hs00152939_m1	TLR4
Hs00159081_m1	MATN3
Hs00152973_m1	TLR9
Hs00159210_m1	MNDA
Hs00153138_m1	CCNA2
Hs00159627_m1	NMBR
Hs00176628_m1	FYN
Hs00178455_m1	PRKCE
Hs00176815_m1	PAK1
Hs00178494_m1	SRC
Hs00176884_m1	PDPK1
Hs00178726_m1	MAP3K5
Hs00176973_m1	PRKCA
Hs00178914_m1	PRKCD
Hs00197646_m1	TBL3
Hs00220393_m1	MGST1
Hs00197982_m1	BCL2L11
Hs00221499_m1	KAT2A
Hs00198320_m1	PLK2
Hs00221707_m1	XRCC5
Hs00199831_m1	ESM1
Hs00229135_m1	WNT3
Hs00269944_m1	BRAF
Hs00357717_m1	CYC1
Hs00270282_m1	STX1A
Hs00358991_g1	CDK5
Hs00270514_m1	LONP1
Hs00359840_m1	SLC2A3
Hs00272002_m1	GNB2L1
Hs00361432_s1	FZD2
Hs00609186_m1	GBE1
Hs00757122_m1	DDX10
Hs00609297_m1	HMBS
Hs00761767_s1	KRT19
Hs00609836_m1	AARS
Hs00765553_m1	CCND1
Hs00610314_m1	HDGF
Hs00793604_m1	YWHAB
Hs00965587_m1	SLC20A1
Hs00997938_m1	GSK3A
Hs00966302_m1	NF2
Hs00998133_m1	TGFB1
Hs00968295_m1	MMP11
Hs00998537_m1	WNT5A
Hs00968436_m1	REL
Hs01001580_m1	ERBB2
Hs01106440_m1	MELK
Hs01547282_m1	IRF3
Hs01112307_m1	ATM
Hs01548727_m1	MMP2
Hs03044127_g1	HSPB1
Hs99999906_m1	PGK1
Hs03044902_g1	PRDX2
Hs99999908_m1	GUSB
Hs00153280_m1	TP53I3
Hs00161707_m1	SKI
Hs00153353_m1	BIRC5
Hs00161826_m1	SLC16A1
Hs00153418_m1	RAD51
Hs00163506_m1	ACADS
Hs00153510_m1	MME
Hs00164004_m1	COL1A1
Hs00177010_m1	PRKCG
Hs00179683_m1	STK32B
Hs00177051_m1	PRKCZ
Hs00179845_m1	MET
Hs00177464_m1	TYK2
Hs00180127_m1	DEK
Hs00177522_m1	CDC42BPA
Hs00180288_m1	CBLB
Hs00201046_m1	HYAL1
Hs00231092_m1	E2F5
Hs00202756_m1	SEC14L2
Hs00231279_m1	REL
Hs00204205_m1	ATAD2
Hs00231535_m1	CNBP
Hs00205182_m1	SND1
Hs00231838_m1	MLLT10
Hs00273319_m1	FKBP8
Hs00361869_g1	FZD5
Hs00273561_s1	CD24;CD24L4
Hs00364282_m1	KRAS
Hs00275656_m1	GSK3B
Hs00365098_m1	COL6A3
Hs00277090_m1	PIK3CG
Hs00365573_m1	WISP1
Hs00610483_m1	HRAS
Hs00799096_s1	RALBP1
Hs00705137_s1	IFITM1
Hs00818252_g1	KPNA2
Hs00736972_m1	YES1
Hs00824723_m1	UBC
Hs00737079_m1	GPR180
Hs00829210_s1	MAP2K2;LOC407835
Hs00969289_m1	BNIP3
Hs01008571_m1	LCN2
Hs00971475_m1	HSPH1
Hs01013123_m1	STAT2
Hs00978565_m1	DTL
Hs01014511_m1	TLR2
Hs00982607_m1	NINJ1
Hs01018151_m1	CASP8
Hs01115513_m1	PPARG
Hs01549976_m1	FN1
Hs01120030_m1	RET
Hs01551876_m1	TJP1
Hs04194521_s1	PPIA
Hs99999909_m1	HPRT1
Hs99999008_m1	MDM2
Hs99999910_m1	TBP
Hs00154208_m1	CA9
Hs00164940_m1	IDUA
Hs00155479_m1	CYR61
Hs00166071_m1	BLMH
Hs00156454_m1	CEBPG
Hs00166223_m1	IFNGR1
Hs00157163_m1	CTPS
Hs00166467_m1	OXCT1
Hs00177766_m1	CDKL1
Hs00180437_m1	DCC
Hs00177821_m1	BUB1
Hs00180529_m1	WNT1
Hs00178289_m1	AKT1
Hs00180562_m1	RBL2
Hs00178340_m1	FGR
Hs00181051_m1	APC
Hs00208408_m1	KIF14
Hs00232013_m1	FOSL2
Hs00212390_m1	LEF1
Hs00232399_m1	RELB
Hs00216455_m1	ECT2
Hs00233492_m1	CANX
Hs00220127_m1	MCCC1
Hs00233790_m1	ITGAV
Hs00286908_m1	KIF21A
Hs00365950_g1	HLA-G
Hs00332674_m1	UHMK1
Hs00366278_m1	TNFRSF10B
Hs00355049_m1	CTNNB1
Hs00366497_m1	ETV3
Hs00356079_m1	GSTM3
Hs00366726_m1	RAD21
Hs00741586_mH	CDC42
Hs00830594_s1	TFDP1
Hs00743792_s1	PABPC1
Hs00854841_g1	DEPDC1
Hs00747110_s1	RHOC
Hs00855332_g1	LDHA
Hs00749309_s1	SYNCRIP
Hs00894816_g1	FASTK
Hs00984230_m1	B2M
Hs01020031_m1	MMP28
Hs00988717_m1	ABCC4
Hs01023087_m1	DHCR7
Hs00990023_m1	RAD50
Hs01025984_m1	RAC1
Hs00991290_m1	RAB5A
Hs01026983_m1	JAK1
Hs01121709_m1	TSG101
Hs01554513_g1	MAD2L1
Hs01124302_m1	M6PR
Hs01556193_m1	BRCA1
Hs00152928_m1	EGR1
Hs00157731_m1	GNAZ
Hs00152939_m1	TLR4
Hs00159081_m1	MATN3
Hs00152973_m1	TLR9
Hs00159210_m1	MNDA
Hs00153138_m1	CCNA2
Hs00159627_m1	NMBR
Hs00176628_m1	FYN
Hs00178455_m1	PRKCE
Hs00176815_m1	PAK1
Hs00178494_m1	SRC
Hs00176884_m1	PDPK1
Hs00178726_m1	MAP3K5
Hs00176973_m1	PRKCA
Hs00178914_m1	PRKCD
Hs00197646_m1	TBL3
Hs00220393_m1	MGST1
Hs00197982_m1	BCL2L11
Hs00221499_m1	KAT2A
Hs00198320_m1	PLK2
Hs00221707_m1	XRCC5
Hs00199831_m1	ESM1
Hs00229135_m1	WNT3
Hs00269944_m1	BRAF
Hs00357717_m1	CYC1
Hs00270282_m1	STX1A
Hs00358991_g1	CDK5
Hs00270514_m1	LONP1
Hs00359840_m1	SLC2A3
Hs00272002_m1	GNB2L1
Hs00361432_s1	FZD2
Hs00609186_m1	GBE1
Hs00757122_m1	DDX10
Hs00609297_m1	HMBS
Hs00761767_s1	KRT19
Hs00609836_m1	AARS
Hs00765553_m1	CCND1
Hs00610314_m1	HDGF
Hs00793604_m1	YWHAB
Hs00965587_m1	SLC20A1
Hs00997938_m1	GSK3A
Hs00966302_m1	NF2
Hs00998133_m1	TGFB1
Hs00968295_m1	MMP11
Hs00998537_m1	WNT5A
Hs00968436_m1	REL
Hs01001580_m1	ERBB2
Hs01106440_m1	MELK
Hs01547282_m1	IRF3
Hs01112307_m1	ATM
Hs01548727_m1	MMP2
Hs03044127_g1	HSPB1
Hs99999906_m1	PGK1
Hs03044902_g1	PRDX2
Hs99999908_m1	GUSB
Hs00153280_m1	TP53I3
Hs00161707_m1	SKI
Hs00153353_m1	BIRC5
Hs00161826_m1	SLC16A1
Hs00153418_m1	RAD51
Hs00163506_m1	ACADS
Hs00153510_m1	MME
Hs00164004_m1	COL1A1
Hs00177010_m1	PRKCG
Hs00179683_m1	STK32B
Hs00177051_m1	PRKCZ
Hs00179845_m1	MET
Hs00177464_m1	TYK2
Hs00180127_m1	DEK
Hs00177522_m1	CDC42BPA
Hs00180288_m1	CBLB
Hs00201046_m1	HYAL1
Hs00231092_m1	E2F5
Hs00202756_m1	SEC14L2
Hs00231279_m1	REL
Hs00204205_m1	ATAD2
Hs00231535_m1	CNBP
Hs00205182_m1	SND1
Hs00231838_m1	MLLT10
Hs00273319_m1	FKBP8
Hs00361869_g1	FZD5
Hs00273561_s1	CD24;CD24L4
Hs00364282_m1	KRAS
Hs00275656_m1	GSK3B
Hs00365098_m1	COL6A3
Hs00277090_m1	PIK3CG
Hs00365573_m1	WISP1
Hs00610483_m1	HRAS
Hs00799096_s1	RALBP1
Hs00705137_s1	IFITM1
Hs00818252_g1	KPNA2
Hs00736972_m1	YES1
Hs00824723_m1	UBC
Hs00737079_m1	GPR180
Hs00829210_s1	MAP2K2;LOC407835
Hs00969289_m1	BNIP3
Hs01008571_m1	LCN2
Hs00971475_m1	HSPH1
Hs01013123_m1	STAT2
Hs00978565_m1	DTL
Hs01014511_m1	TLR2
Hs00982607_m1	NINJ1
Hs01018151_m1	CASP8
Hs01115513_m1	PPARG
Hs01549976_m1	FN1
Hs01120030_m1	RET
Hs01551876_m1	TJP1
Hs04194521_s1	PPIA
Hs99999909_m1	HPRT1
Hs99999008_m1	MDM2
Hs99999910_m1	TBP
Hs00154208_m1	CA9
Hs00164940_m1	IDUA
Hs00155479_m1	CYR61
Hs00166071_m1	BLMH
Hs00156454_m1	CEBPG
Hs00166223_m1	IFNGR1
Hs00157163_m1	CTPS
Hs00166467_m1	OXCT1
Hs00177766_m1	CDKL1
Hs00180437_m1	DCC
Hs00177821_m1	BUB1
Hs00180529_m1	WNT1
Hs00178289_m1	AKT1
Hs00180562_m1	RBL2
Hs00178340_m1	FGR
Hs00181051_m1	APC
Hs00208408_m1	KIF14
Hs00232013_m1	FOSL2
Hs00212390_m1	LEF1
Hs00232399_m1	RELB
Hs00216455_m1	ECT2
Hs00233492_m1	CANX
Hs00220127_m1	MCCC1
Hs00233790_m1	ITGAV
Hs00286908_m1	KIF21A
Hs00365950_g1	HLA-G
Hs00332674_m1	UHMK1
Hs00366278_m1	TNFRSF10B
Hs00355049_m1	CTNNB1
Hs00366497_m1	ETV3
Hs00356079_m1	GSTM3
Hs00366726_m1	RAD21
Hs00741586_mH	CDC42
Hs00830594_s1	TFDP1
Hs00743792_s1	PABPC1
Hs00854841_g1	DEPDC1
Hs00747110_s1	RHOC
Hs00855332_g1	LDHA
Hs00749309_s1	SYNCRIP
Hs00894816_g1	FASTK
Hs00984230_m1	B2M
Hs01020031_m1	MMP28
Hs00988717_m1	ABCC4
Hs01023087_m1	DHCR7
Hs00990023_m1	RAD50
Hs01025984_m1	RAC1
Hs00991290_m1	RAB5A
Hs01026983_m1	JAK1
Hs01121709_m1	TSG101
Hs01554513_g1	MAD2L1
Hs01124302_m1	M6PR
Hs01556193_m1	BRCA1
Hs00168547_m1	NQO1
Hs00173503_m1	FRZB
Hs00169407_m1	RIPK1
Hs00173742_m1	FGF3
Hs00169714_m1	NF1
Hs00174029_m1	KIT
Hs00170630_m1	FOS
Hs00174141_m1	CD59
Hs00181419_m1	IGF2R
Hs00186689_m1	ALDH4A1
Hs00181767_m1	IGFBP4
Hs00188713_m1	BAG3
Hs00182059_m1	MCC
Hs00191535_m1	CLTC
Hs00182192_m1	PLCG2
Hs00191882_m1	DHX8
Hs00234119_m1	RAF1
Hs00247620_m1	NRG1
Hs00234244_m1	TGFB2
Hs00248408_m1	40792
Hs00234508_m1	MTOR
Hs00253876_m1	NR1D1
Hs00234753_m1	MDM2
Hs00255374_m1	UCHL5
Hs00370265_m1	ASNS
Hs00427469_m1	RFC4
Hs00374280_m1	STAT3
Hs00427993_m1	AGFG1
Hs00379185_m1	MIB1
Hs00428633_m1	TUBA4A
Hs00382884_m1	HSPA4
Hs00533490_m1	SOD1
Hs00898625_g1	YBX1
Hs00943178_g1	PGK1
Hs00900055_m1	VEGFA
Hs00944025_m1	CEACAM5
Hs00905030_m1	MYC
Hs00945948_m1	RFC2
Hs00907966_m1	PIK3CA
Hs00947433_m1	CTSB
Hs01027515_gH	STMN1
Hs01062125_m1	TK1
Hs01030097_m1	CCNB1
Hs01064444_m1	AXL
Hs01032845_m1	SEPP1
Hs01072069_g1	RRM2
Hs01033129_m1	STMN1
Hs01075861_m1	CD44
Hs01568269_m1	APC
Hs01910190_s1	CARD17
Hs01573874_g1	NME3
Hs01920652_s1	PTEN
Hs03070834_m1	FBXO5
Hs02621289_g1	TPT1
Hs00170780_m1	CIB1
Hs00174297_m1	CD70
Hs00171132_m1	GDF15
Hs00174517_m1	NFKB2
Hs00171172_m1	AR
Hs00174819_m1	SEMA4D
Hs00171254_m1	IGF2
Hs00174877_m1	LEP
Hs00182370_m1	SHB
Hs00192399_m1	PIK3CD
Hs00182896_m1	DVL1
Hs00192581_m1	SIAH2
Hs00183573_m1	GNA13
Hs00193920_m1	CHAF1A
Hs00183953_m1	BCAR1
Hs00195432_m1	SMAD1
Hs00236216_m1	ITGB4
Hs00259932_m1	SELENBP1
Hs00236810_m1	CP
Hs00262861_m1	CDK4
Hs00236949_m1	CCND3
Hs00264721_m1	MSH6
Hs00237119_m1	MMP14
Hs00266592_m1	FBN2
Hs00383065_m1	IP6K2
Hs00539278_m1	MYRIP
Hs00385075_m1	MAPK3
Hs00559623_m1	MAPK13
Hs00411505_m1	ASPM
Hs00560089_m1	TRAM1
Hs00412720_m1	SP1
Hs00603799_m1	ARMC1
Hs00910225_m1	ALB
Hs00950344_m1	SNAI2
Hs00912963_m1	CRAT
Hs00951941_m1	ETV1
Hs00914334_m1	LTF
Hs00953523_m1	MSH2
Hs00918009_g1	GRB7
Hs00955802_m1	RPN2
Hs01037584_m1	AP2M1
Hs01078066_m1	RB1
Hs01042010_m1	RELA
Hs01085579_m1	EIF2C2
Hs01045418_m1	SKIL
Hs01086000_m1	TGFB3
Hs01047580_m1	STAT3
Hs01090047_m1	PRKCD
Hs01588973_m1	CYCS
Hs01941416_g1	KRT18
Hs01635324_s1	HMGN2
Hs02330328_s1	SOCS3
Hs99999141_s1	JUN
Hs03929097_g1	GAPDH
Hs00171558_m1	TIMP1
Hs00175188_m1	CTSC
Hs00171832_m1	FGF8
Hs00175938_m1	CDKN1C
Hs00176222_m1	CDK9
Hs00172895_m1	ABI2
Hs00176481_m1	CDKN2D
Hs00184500_m1	ABCB1
Hs00195612_m1	TBX3
Hs00185574_m1	EZR
Hs00196132_m1	PRAME
Hs00186374_m1	PIR
Hs00196542_m1	PPP2R5A
Hs00186447_m1	DEGS1
Hs00197328_m1	HYOU1
Hs00241497_m1	KITLG
Hs00267597_m1	PRKAR1A
Hs00242386_m1	CBFB
Hs00268847_m1	USP7
Hs00242993_m1	PFKP
Hs00269428_m1	PEA15
Hs00243327_m1	XRCC4
Hs00269500_m1	GMPS
Hs00413861_m1	KRT9
Hs00605615_mH	MAP2K1
Hs00416477_m1	TNK2
Hs00608023_m1	BCL2
Hs00426694_m1	AP2B1
Hs00608224_m1	WNT2
Hs00427214_g1	PCNA
Hs00609073_m1	BRCA2
Hs00923894_m1	CDKN2A
Hs00960227_m1	MS4A7
Hs00927728_m1	PIK3CB
Hs00961554_m1	INSR
Hs00932747_m1	TGFBI
Hs00962908_m1	THBS1
Hs00939627_m1	GUSB
Hs00964426_m1	PDGFA
Hs01050719_m1	NOTCH2
Hs01091564_m1	MCM2
Hs01052961_m1	FLT1
Hs01093019_m1	GSPT1
Hs01054576_m1	FOXO1
Hs01099594_m1	BMP6
Hs01061576_m1	DHRS2
Hs01103749_m1	WT1
Hs01652468_g1	PGAM1
Hs02339492_g1	PTMA
Hs01888362_g1	H2AFZ
Hs02621185_s1	HDAC1
Hs99999905_m1	GAPDH
Hs99999901_s1	18S
Hs00168547_m1	NQO1
Hs00173503_m1	FRZB
Hs00169407_m1	RIPK1
Hs00173742_m1	FGF3
Hs00169714_m1	NF1
Hs00174029_m1	KIT
Hs00170630_m1	FOS
Hs00174141_m1	CD59
Hs00181419_m1	IGF2R
Hs00186689_m1	ALDH4A1
Hs00181767_m1	IGFBP4
Hs00188713_m1	BAG3
Hs00182059_m1	MCC
Hs00191535_m1	CLTC
Hs00182192_m1	PLCG2
Hs00191882_m1	DHX8
Hs00234119_m1	RAF1
Hs00247620_m1	NRG1
Hs00234244_m1	TGFB2
Hs00248408_m1	40792
Hs00234508_m1	MTOR
Hs00253876_m1	NR1D1
Hs00234753_m1	MDM2
Hs00255374_m1	UCHL5
Hs00370265_m1	ASNS
Hs00427469_m1	RFC4
Hs00374280_m1	STAT3
Hs00427993_m1	AGFG1
Hs00379185_m1	MIB1
Hs00428633_m1	TUBA4A
Hs00382884_m1	HSPA4
Hs00533490_m1	SOD1
Hs00898625_g1	YBX1
Hs00943178_g1	PGK1
Hs00900055_m1	VEGFA
Hs00944025_m1	CEACAM5
Hs00905030_m1	MYC
Hs00945948_m1	RFC2
Hs00907966_m1	PIK3CA
Hs00947433_m1	CTSB
Hs01027515_gH	STMN1
Hs01062125_m1	TK1
Hs01030097_m1	CCNB1
Hs01064444_m1	AXL
Hs01032845_m1	SEPP1
Hs01072069_g1	RRM2
Hs01033129_m1	STMN1
Hs01075861_m1	CD44
Hs01568269_m1	APC
Hs01910190_s1	CARD17
Hs01573874_g1	NME3
Hs01920652_s1	PTEN
Hs03070834_m1	FBXO5
Hs02621289_g1	TPT1
Hs00170780_m1	CIB1
Hs00174297_m1	CD70
Hs00171132_m1	GDF15
Hs00174517_m1	NFKB2
Hs00171172_m1	AR
Hs00174819_m1	SEMA4D
Hs00171254_m1	IGF2
Hs00174877_m1	LEP
Hs00182370_m1	SHB
Hs00192399_m1	PIK3CD
Hs00182896_m1	DVL1
Hs00192581_m1	SIAH2
Hs00183573_m1	GNA13
Hs00193920_m1	CHAF1A
Hs00183953_m1	BCAR1
Hs00195432_m1	SMAD1
Hs00236216_m1	ITGB4
Hs00259932_m1	SELENBP1
Hs00236810_m1	CP
Hs00262861_m1	CDK4
Hs00236949_m1	CCND3
Hs00264721_m1	MSH6
Hs00237119_m1	MMP14
Hs00266592_m1	FBN2
Hs00383065_m1	IP6K2
Hs00539278_m1	MYRIP
Hs00385075_m1	MAPK3
Hs00559623_m1	MAPK13
Hs00411505_m1	ASPM
Hs00560089_m1	TRAM1
Hs00412720_m1	SP1
Hs00603799_m1	ARMC1
Hs00910225_m1	ALB
Hs00950344_m1	SNAI2
Hs00912963_m1	CRAT
Hs00951941_m1	ETV1
Hs00914334_m1	LTF
Hs00953523_m1	MSH2
Hs00918009_g1	GRB7
Hs00955802_m1	RPN2
Hs01037584_m1	AP2M1
Hs01078066_m1	RB1
Hs01042010_m1	RELA
Hs01085579_m1	EIF2C2
Hs01045418_m1	SKIL
Hs01086000_m1	TGFB3
Hs01047580_m1	STAT3
Hs01090047_m1	PRKCD
Hs01588973_m1	CYCS
Hs01941416_g1	KRT18
Hs01635324_s1	HMGN2
Hs02330328_s1	SOCS3
Hs99999141_s1	JUN
Hs03929097_g1	GAPDH
Hs00171558_m1	TIMP1
Hs00175188_m1	CTSC
Hs00171832_m1	FGF8
Hs00175938_m1	CDKN1C
Hs00176222_m1	CDK9
Hs00172895_m1	ABI2
Hs00176481_m1	CDKN2D
Hs00184500_m1	ABCB1
Hs00195612_m1	TBX3
Hs00185574_m1	EZR
Hs00196132_m1	PRAME
Hs00186374_m1	PIR
Hs00196542_m1	PPP2R5A
Hs00186447_m1	DEGS1
Hs00197328_m1	HYOU1
Hs00241497_m1	KITLG
Hs00267597_m1	PRKAR1A
Hs00242386_m1	CBFB
Hs00268847_m1	USP7
Hs00242993_m1	PFKP
Hs00269428_m1	PEA15
Hs00243327_m1	XRCC4
Hs00269500_m1	GMPS
Hs00413861_m1	KRT9
Hs00605615_mH	MAP2K1
Hs00416477_m1	TNK2
Hs00608023_m1	BCL2
Hs00426694_m1	AP2B1
Hs00608224_m1	WNT2
Hs00427214_g1	PCNA
Hs00609073_m1	BRCA2
Hs00923894_m1	CDKN2A
Hs00960227_m1	MS4A7
Hs00927728_m1	PIK3CB
Hs00961554_m1	INSR
Hs00932747_m1	TGFBI
Hs00962908_m1	THBS1
Hs00939627_m1	GUSB
Hs00964426_m1	PDGFA
Hs01050719_m1	NOTCH2
Hs01091564_m1	MCM2
Hs01052961_m1	FLT1
Hs01093019_m1	GSPT1
Hs01054576_m1	FOXO1
Hs01099594_m1	BMP6
Hs01061576_m1	DHRS2
Hs01103749_m1	WT1
Hs01652468_g1	PGAM1
Hs02339492_g1	PTMA
Hs01888362_g1	H2AFZ
Hs02621185_s1	HDAC1
Hs99999905_m1	GAPDH
Hs99999901_s1	18S
Hs00168547_m1	NQO1
Hs00173503_m1	FRZB
Hs00169407_m1	RIPK1
Hs00173742_m1	FGF3
Hs00169714_m1	NF1
Hs00174029_m1	KIT
Hs00170630_m1	FOS
Hs00174141_m1	CD59
Hs00181419_m1	IGF2R
Hs00186689_m1	ALDH4A1
Hs00181767_m1	IGFBP4
Hs00188713_m1	BAG3
Hs00182059_m1	MCC
Hs00191535_m1	CLTC
Hs00182192_m1	PLCG2
Hs00191882_m1	DHX8
Hs00234119_m1	RAF1
Hs00247620_m1	NRG1
Hs00234244_m1	TGFB2
Hs00248408_m1	40792
Hs00234508_m1	MTOR
Hs00253876_m1	NR1D1
Hs00234753_m1	MDM2
Hs00255374_m1	UCHL5
Hs00370265_m1	ASNS
Hs00427469_m1	RFC4
Hs00374280_m1	STAT3
Hs00427993_m1	AGFG1
Hs00379185_m1	MIB1
Hs00428633_m1	TUBA4A
Hs00382884_m1	HSPA4
Hs00533490_m1	SOD1
Hs00898625_g1	YBX1
Hs00943178_g1	PGK1
Hs00900055_m1	VEGFA
Hs00944025_m1	CEACAM5
Hs00905030_m1	MYC
Hs00945948_m1	RFC2
Hs00907966_m1	PIK3CA
Hs00947433_m1	CTSB
Hs01027515_gH	STMN1
Hs01062125_m1	TK1
Hs01030097_m1	CCNB1
Hs01064444_m1	AXL
Hs01032845_m1	SEPP1
Hs01072069_g1	RRM2
Hs01033129_m1	STMN1
Hs01075861_m1	CD44
Hs01568269_m1	APC
Hs01910190_s1	CARD17
Hs01573874_g1	NME3
Hs01920652_s1	PTEN
Hs03070834_m1	FBXO5
Hs02621289_g1	TPT1
Hs00170780_m1	CIB1
Hs00174297_m1	CD70
Hs00171132_m1	GDF15
Hs00174517_m1	NFKB2
Hs00171172_m1	AR
Hs00174819_m1	SEMA4D
Hs00171254_m1	IGF2
Hs00174877_m1	LEP
Hs00182370_m1	SHB
Hs00192399_m1	PIK3CD
Hs00182896_m1	DVL1
Hs00192581_m1	SIAH2
Hs00183573_m1	GNA13
Hs00193920_m1	CHAF1A
Hs00183953_m1	BCAR1
Hs00195432_m1	SMAD1
Hs00236216_m1	ITGB4
Hs00259932_m1	SELENBP1
Hs00236810_m1	CP
Hs00262861_m1	CDK4
Hs00236949_m1	CCND3
Hs00264721_m1	MSH6
Hs00237119_m1	MMP14
Hs00266592_m1	FBN2
Hs00383065_m1	IP6K2
Hs00539278_m1	MYRIP
Hs00385075_m1	MAPK3
Hs00559623_m1	MAPK13
Hs00411505_m1	ASPM
Hs00560089_m1	TRAM1
Hs00412720_m1	SP1
Hs00603799_m1	ARMC1
Hs00910225_m1	ALB
Hs00950344_m1	SNAI2
Hs00912963_m1	CRAT
Hs00951941_m1	ETV1
Hs00914334_m1	LTF
Hs00953523_m1	MSH2
Hs00918009_g1	GRB7
Hs00955802_m1	RPN2
Hs01037584_m1	AP2M1
Hs01078066_m1	RB1
Hs01042010_m1	RELA
Hs01085579_m1	EIF2C2
Hs01045418_m1	SKIL
Hs01086000_m1	TGFB3
Hs01047580_m1	STAT3
Hs01090047_m1	PRKCD
Hs01588973_m1	CYCS
Hs01941416_g1	KRT18
Hs01635324_s1	HMGN2
Hs02330328_s1	SOCS3
Hs99999141_s1	JUN
Hs03929097_g1	GAPDH
Hs00171558_m1	TIMP1
Hs00175188_m1	CTSC
Hs00171832_m1	FGF8
Hs00175938_m1	CDKN1C
Hs00176222_m1	CDK9
Hs00172895_m1	ABI2
Hs00176481_m1	CDKN2D
Hs00184500_m1	ABCB1
Hs00195612_m1	TBX3
Hs00185574_m1	EZR
Hs00196132_m1	PRAME
Hs00186374_m1	PIR
Hs00196542_m1	PPP2R5A
Hs00186447_m1	DEGS1
Hs00197328_m1	HYOU1
Hs00241497_m1	KITLG
Hs00267597_m1	PRKAR1A
Hs00242386_m1	CBFB
Hs00268847_m1	USP7
Hs00242993_m1	PFKP
Hs00269428_m1	PEA15
Hs00243327_m1	XRCC4
Hs00269500_m1	GMPS
Hs00413861_m1	KRT9
Hs00605615_mH	MAP2K1
Hs00416477_m1	TNK2
Hs00608023_m1	BCL2
Hs00426694_m1	AP2B1
Hs00608224_m1	WNT2
Hs00427214_g1	PCNA
Hs00609073_m1	BRCA2
Hs00923894_m1	CDKN2A
Hs00960227_m1	MS4A7
Hs00927728_m1	PIK3CB
Hs00961554_m1	INSR
Hs00932747_m1	TGFBI
Hs00962908_m1	THBS1
Hs00939627_m1	GUSB
Hs00964426_m1	PDGFA
Hs01050719_m1	NOTCH2
Hs01091564_m1	MCM2
Hs01052961_m1	FLT1
Hs01093019_m1	GSPT1
Hs01054576_m1	FOXO1
Hs01099594_m1	BMP6
Hs01061576_m1	DHRS2
Hs01103749_m1	WT1
Hs01652468_g1	PGAM1
Hs02339492_g1	PTMA
Hs01888362_g1	H2AFZ
Hs02621185_s1	HDAC1
Hs99999905_m1	GAPDH
Hs99999901_s1	18S
Hs00168547_m1	NQO1
Hs00173503_m1	FRZB
Hs00169407_m1	RIPK1
Hs00173742_m1	FGF3
Hs00169714_m1	NF1
Hs00174029_m1	KIT
Hs00170630_m1	FOS
Hs00174141_m1	CD59
Hs00181419_m1	IGF2R
Hs00186689_m1	ALDH4A1
Hs00181767_m1	IGFBP4
Hs00188713_m1	BAG3
Hs00182059_m1	MCC
Hs00191535_m1	CLTC
Hs00182192_m1	PLCG2
Hs00191882_m1	DHX8
Hs00234119_m1	RAF1
Hs00247620_m1	NRG1
Hs00234244_m1	TGFB2
Hs00248408_m1	40792
Hs00234508_m1	MTOR
Hs00253876_m1	NR1D1
Hs00234753_m1	MDM2
Hs00255374_m1	UCHL5
Hs00370265_m1	ASNS
Hs00427469_m1	RFC4
Hs00374280_m1	STAT3
Hs00427993_m1	AGFG1
Hs00379185_m1	MIB1
Hs00428633_m1	TUBA4A
Hs00382884_m1	HSPA4
Hs00533490_m1	SOD1
Hs00898625_g1	YBX1
Hs00943178_g1	PGK1
Hs00900055_m1	VEGFA
Hs00944025_m1	CEACAM5
Hs00905030_m1	MYC
Hs00945948_m1	RFC2
Hs00907966_m1	PIK3CA
Hs00947433_m1	CTSB
Hs01027515_gH	STMN1
Hs01062125_m1	TK1
Hs01030097_m1	CCNB1
Hs01064444_m1	AXL
Hs01032845_m1	SEPP1
Hs01072069_g1	RRM2
Hs01033129_m1	STMN1
Hs01075861_m1	CD44
Hs01568269_m1	APC
Hs01910190_s1	CARD17
Hs01573874_g1	NME3
Hs01920652_s1	PTEN
Hs03070834_m1	FBXO5
Hs02621289_g1	TPT1
Hs00170780_m1	CIB1
Hs00174297_m1	CD70
Hs00171132_m1	GDF15
Hs00174517_m1	NFKB2
Hs00171172_m1	AR
Hs00174819_m1	SEMA4D
Hs00171254_m1	IGF2
Hs00174877_m1	LEP
Hs00182370_m1	SHB
Hs00192399_m1	PIK3CD
Hs00182896_m1	DVL1
Hs00192581_m1	SIAH2
Hs00183573_m1	GNA13
Hs00193920_m1	CHAF1A
Hs00183953_m1	BCAR1
Hs00195432_m1	SMAD1
Hs00236216_m1	ITGB4
Hs00259932_m1	SELENBP1
Hs00236810_m1	CP
Hs00262861_m1	CDK4
Hs00236949_m1	CCND3
Hs00264721_m1	MSH6
Hs00237119_m1	MMP14
Hs00266592_m1	FBN2
Hs00383065_m1	IP6K2
Hs00539278_m1	MYRIP
Hs00385075_m1	MAPK3
Hs00559623_m1	MAPK13
Hs00411505_m1	ASPM
Hs00560089_m1	TRAM1
Hs00412720_m1	SP1
Hs00603799_m1	ARMC1
Hs00910225_m1	ALB
Hs00950344_m1	SNAI2
Hs00912963_m1	CRAT
Hs00951941_m1	ETV1
Hs00914334_m1	LTF
Hs00953523_m1	MSH2
Hs00918009_g1	GRB7
Hs00955802_m1	RPN2
Hs01037584_m1	AP2M1
Hs01078066_m1	RB1
Hs01042010_m1	RELA
Hs01085579_m1	EIF2C2
Hs01045418_m1	SKIL
Hs01086000_m1	TGFB3
Hs01047580_m1	STAT3
Hs01090047_m1	PRKCD
Hs01588973_m1	CYCS
Hs01941416_g1	KRT18
Hs01635324_s1	HMGN2
Hs02330328_s1	SOCS3
Hs99999141_s1	JUN
Hs03929097_g1	GAPDH
Hs00171558_m1	TIMP1
Hs00175188_m1	CTSC
Hs00171832_m1	FGF8
Hs00175938_m1	CDKN1C
Hs00176222_m1	CDK9
Hs00172895_m1	ABI2
Hs00176481_m1	CDKN2D
Hs00184500_m1	ABCB1
Hs00195612_m1	TBX3
Hs00185574_m1	EZR
Hs00196132_m1	PRAME
Hs00186374_m1	PIR
Hs00196542_m1	PPP2R5A
Hs00186447_m1	DEGS1
Hs00197328_m1	HYOU1
Hs00241497_m1	KITLG
Hs00267597_m1	PRKAR1A
Hs00242386_m1	CBFB
Hs00268847_m1	USP7
Hs00242993_m1	PFKP
Hs00269428_m1	PEA15
Hs00243327_m1	XRCC4
Hs00269500_m1	GMPS
Hs00413861_m1	KRT9
Hs00605615_mH	MAP2K1
Hs00416477_m1	TNK2
Hs00608023_m1	BCL2
Hs00426694_m1	AP2B1
Hs00608224_m1	WNT2
Hs00427214_g1	PCNA
Hs00609073_m1	BRCA2
Hs00923894_m1	CDKN2A
Hs00960227_m1	MS4A7
Hs00927728_m1	PIK3CB
Hs00961554_m1	INSR
Hs00932747_m1	TGFBI
Hs00962908_m1	THBS1
Hs00939627_m1	GUSB
Hs00964426_m1	PDGFA
Hs01050719_m1	NOTCH2
Hs01091564_m1	MCM2
Hs01052961_m1	FLT1
Hs01093019_m1	GSPT1
Hs01054576_m1	FOXO1
Hs01099594_m1	BMP6
Hs01061576_m1	DHRS2
Hs01103749_m1	WT1
Hs01652468_g1	PGAM1
Hs02339492_g1	PTMA
Hs01888362_g1	H2AFZ
Hs02621185_s1	HDAC1
Hs99999905_m1	GAPDH
Hs99999901_s1	18S
Hs00152933_m1	TLR3
Hs00157817_m1	GRB2
Hs00152971_m1	TLR7
Hs00159092_m1	MDM4
Hs00153074_m1	ROCK2
Hs00159600_m1	NID1
Hs00153277_m1	CDKN1B
Hs00160947_m1	PTPRN
Hs00176719_m1	LYN
Hs00178463_m1	ROCK1
Hs00176839_m1	CDK17
Hs00178500_m1	TIE1
Hs00176966_m1	PRKAR2B
Hs00178837_m1	CDK16
Hs00176998_m1	PRKCB
Hs00179382_m1	APPL1
Hs00197856_m1	SARS
Hs00221277_m1	SCUBE2
Hs00198091_m1	CGRRF1
Hs00221664_m1	DLG3
Hs00198887_m1	BTG2
Hs00225132_m1	RASL11B
Hs00200720_m1	PHB2
Hs00230762_m1	GPR39
Hs00269977_m1	COX6C
Hs00357891_s1	JUNB
Hs00270424_m1	CCNB2
Hs00359394_g1	MT3
Hs00270768_m1	TLE1
Hs00360961_m1	MAP2K2
Hs00272649_s1	TPBG
Hs00361747_m1	SORT1
Hs00609293_g1	HMBS
Hs00757841_m1	MTDH
Hs00609566_m1	IGF1R
Hs00762869_s1	PKM2
Hs00610263_m1	DVL3
Hs00765730_m1	NFKB1
Hs00610318_m1	TGFBR1
Hs00797747_s1	PFDN4
Hs00965889_m1	NOTCH4
Hs00998018_m1	PDGFRA
Hs00966522_m1	PDGFB
Hs00998426_m1	CAPNS1
Hs00968308_m1	MMP3
Hs01001469_m1	ITGB3
Hs00968567_s1	SFN
Hs01003267_m1	HPRT1
Hs01108847_m1	MMP17
Hs01548508_m1	MAPK8
Hs01114253_m1	TGFBR3
Hs01548894_m1	CDK2
Hs03044281_g1	YWHAZ
Hs99999907_m1	B2M
Hs03063352_s1	BIRC5
Hs00153294_m1	RELA
Hs00161719_m1	SLC1A4
Hs00153380_m1	CCND2
Hs00162613_m1	TCF4
Hs00153451_m1	E2F1
Hs00163761_m1	BTK
Hs00154054_m1	ANXA5
Hs00164932_m1	ICAM1
Hs00177037_m1	PRKD1
Hs00179843_m1	SHH
Hs00177357_m1	RPS6KB1
Hs00180035_m1	NRAS
Hs00177481_m1	AKAP1
Hs00180269_m1	BAX
Hs00177708_m1	TNK1
Hs00180312_m1	MLLT3
Hs00201226_m1	CASC3
Hs00231101_m1	ETV6
Hs00204173_m1	MRPL13
Hs00231476_m1	TFAP2C
Hs00204876_m1	ORC6L
Hs00231780_m1	EGR3
Hs00205854_m1	RHOD
Hs00231908_m1	KDM5A
Hs00273500_m1	STAT5B
Hs00362370_m1	RGS19
Hs00275226_m1	EVL
Hs00364293_m1	CDK1
Hs00276002_m1	SIVA1
Hs00365249_m1	CDKN2B
Hs00277190_s1	JUN
Hs00365799_m1	CAMK2B
Hs00610488_m1	TP53BP2
Hs00811070_m1	MAX
Hs00705164_s1	SOCS1
Hs00822401_m1	CTSL2
Hs00737028_m1	DVL1
Hs00740298_g1	HLA-C
Hs00830226_gH	FTL
Hs00969569_m1	ATP5B
Hs01009038_m1	TCF7L2
Hs00977140_m1	RARB
Hs01013989_m1	STAT1
Hs00981572_m1	RAB6B
Hs01016789_m1	EZH2
Hs00983323_m1	FBP1
Hs01019082_mH	VDAC1
Hs01117001_m1	CUL1
Hs01550934_m1	CDC25B
Hs01121102_g1	MAPRE1
Hs01554450_m1	ERCC3
Hs99999003_m1	MYC
Hs99999018_m1	BCL2
Hs99999911_m1	TFRC
Hs00154457_m1	CIRBP
Hs00165949_m1	TIMP3
Hs00156411_m1	CDC25C
Hs00166169_m1	G6PD
Hs00156455_m1	CENPA
Hs00166294_m1	KRT2
Hs00157213_m1	CTSE
Hs00167402_m1	ACY1
Hs00177774_m1	PKMYT1
Hs00180450_m1	GRB7
Hs00177957_m1	MAPKAPK3
Hs00180533_m1	ARHGEF5
Hs00178297_m1	MAP3K8
Hs00180679_m1	PIK3CA
Hs00178427_m1	LCK
Hs00181211_m1	IGFBP3
Hs00211096_m1	CAMK2A
Hs00232074_m1	MYCN
Hs00212828_m1	PRKD2
Hs00232479_m1	LZTR1
Hs00217947_m1	FGD6
Hs00233722_m1	ITGA3
Hs00220348_m1	CHPT1
Hs00234046_m1	PLCG1
Hs00292627_s1	ZMYND8
Hs00366152_m1	UBE2D2
Hs00355045_m1	CTNNB1
Hs00366363_m1	CRHR1
Hs00355782_m1	CDKN1A
Hs00366502_g1	GNB2
Hs00357608_m1	RHOA
Hs00366740_m1	PPIH
Hs00742533_s1	TUBB2A
Hs00854538_g1	PA2G4
Hs00746337_s1	PRKX
Hs00855044_g1	PHB
Hs00747379_m1	ID2
Hs00869394_s1	ARHGAP5
Hs00754870_s1	DCN
Hs00895608_m1	MX1
Hs00985157_m1	UCHL1
Hs01020073_m1	TRIP13
Hs00989970_m1	PRKCQ
Hs01023894_m1	CDH1
Hs00990732_m1	CD34
Hs01026536_m1	CCNE1
Hs00995282_g1	XRCC6
Hs01027360_g1	PSMA1
Hs01122781_m1	KIF3B
Hs01555410_m1	IL1B
Hs01125548_m1	UBE2L6
Hs01556702_m1	PGR
Hs99999903_m1	ACTB
Hs99999904_m1	PPIA
Hs00152933_m1	TLR3
Hs00157817_m1	GRB2
Hs00152971_m1	TLR7
Hs00159092_m1	MDM4
Hs00153074_m1	ROCK2
Hs00159600_m1	NID1
Hs00153277_m1	CDKN1B
Hs00160947_m1	PTPRN
Hs00176719_m1	LYN
Hs00178463_m1	ROCK1
Hs00176839_m1	CDK17
Hs00178500_m1	TIE1
Hs00176966_m1	PRKAR2B
Hs00178837_m1	CDK16
Hs00176998_m1	PRKCB
Hs00179382_m1	APPL1
Hs00197856_m1	SARS
Hs00221277_m1	SCUBE2
Hs00198091_m1	CGRRF1
Hs00221664_m1	DLG3
Hs00198887_m1	BTG2
Hs00225132_m1	RASL11B
Hs00200720_m1	PHB2
Hs00230762_m1	GPR39
Hs00269977_m1	COX6C
Hs00357891_s1	JUNB
Hs00270424_m1	CCNB2
Hs00359394_g1	MT3
Hs00270768_m1	TLE1
Hs00360961_m1	MAP2K2
Hs00272649_s1	TPBG
Hs00361747_m1	SORT1
Hs00609293_g1	HMBS
Hs00757841_m1	MTDH
Hs00609566_m1	IGF1R
Hs00762869_s1	PKM2
Hs00610263_m1	DVL3
Hs00765730_m1	NFKB1
Hs00610318_m1	TGFBR1
Hs00797747_s1	PFDN4
Hs00965889_m1	NOTCH4
Hs00998018_m1	PDGFRA
Hs00966522_m1	PDGFB
Hs00998426_m1	CAPNS1
Hs00968308_m1	MMP3
Hs01001469_m1	ITGB3
Hs00968567_s1	SFN
Hs01003267_m1	HPRT1
Hs01108847_m1	MMP17
Hs01548508_m1	MAPK8
Hs01114253_m1	TGFBR3
Hs01548894_m1	CDK2
Hs03044281_g1	YWHAZ
Hs99999907_m1	B2M
Hs03063352_s1	BIRC5
Hs00153294_m1	RELA
Hs00161719_m1	SLC1A4
Hs00153380_m1	CCND2
Hs00162613_m1	TCF4
Hs00153451_m1	E2F1
Hs00163761_m1	BTK
Hs00154054_m1	ANXA5
Hs00164932_m1	ICAM1
Hs00177037_m1	PRKD1
Hs00179843_m1	SHH
Hs00177357_m1	RPS6KB1
Hs00180035_m1	NRAS
Hs00177481_m1	AKAP1
Hs00180269_m1	BAX
Hs00177708_m1	TNK1
Hs00180312_m1	MLLT3
Hs00201226_m1	CASC3
Hs00231101_m1	ETV6
Hs00204173_m1	MRPL13
Hs00231476_m1	TFAP2C
Hs00204876_m1	ORC6L
Hs00231780_m1	EGR3
Hs00205854_m1	RHOD
Hs00231908_m1	KDM5A
Hs00273500_m1	STAT5B
Hs00362370_m1	RGS19
Hs00275226_m1	EVL
Hs00364293_m1	CDK1
Hs00276002_m1	SIVA1
Hs00365249_m1	CDKN2B
Hs00277190_s1	JUN
Hs00365799_m1	CAMK2B
Hs00610488_m1	TP53BP2
Hs00811070_m1	MAX
Hs00705164_s1	SOCS1
Hs00822401_m1	CTSL2
Hs00737028_m1	DVL1
Hs00740298_g1	HLA-C
Hs00830226_gH	FTL
Hs00969569_m1	ATP5B
Hs01009038_m1	TCF7L2
Hs00977140_m1	RARB
Hs01013989_m1	STAT1
Hs00981572_m1	RAB6B
Hs01016789_m1	EZH2
Hs00983323_m1	FBP1
Hs01019082_mH	VDAC1
Hs01117001_m1	CUL1
Hs01550934_m1	CDC25B
Hs01121102_g1	MAPRE1
Hs01554450_m1	ERCC3
Hs99999003_m1	MYC
Hs99999018_m1	BCL2
Hs99999911_m1	TFRC
Hs00154457_m1	CIRBP
Hs00165949_m1	TIMP3
Hs00156411_m1	CDC25C
Hs00166169_m1	G6PD
Hs00156455_m1	CENPA
Hs00166294_m1	KRT2
Hs00157213_m1	CTSE
Hs00167402_m1	ACY1
Hs00177774_m1	PKMYT1
Hs00180450_m1	GRB7
Hs00177957_m1	MAPKAPK3
Hs00180533_m1	ARHGEF5
Hs00178297_m1	MAP3K8
Hs00180679_m1	PIK3CA
Hs00178427_m1	LCK
Hs00181211_m1	IGFBP3
Hs00211096_m1	CAMK2A
Hs00232074_m1	MYCN
Hs00212828_m1	PRKD2
Hs00232479_m1	LZTR1
Hs00217947_m1	FGD6
Hs00233722_m1	ITGA3
Hs00220348_m1	CHPT1
Hs00234046_m1	PLCG1
Hs00292627_s1	ZMYND8
Hs00366152_m1	UBE2D2
Hs00355045_m1	CTNNB1
Hs00366363_m1	CRHR1
Hs00355782_m1	CDKN1A
Hs00366502_g1	GNB2
Hs00357608_m1	RHOA
Hs00366740_m1	PPIH
Hs00742533_s1	TUBB2A
Hs00854538_g1	PA2G4
Hs00746337_s1	PRKX
Hs00855044_g1	PHB
Hs00747379_m1	ID2
Hs00869394_s1	ARHGAP5
Hs00754870_s1	DCN
Hs00895608_m1	MX1
Hs00985157_m1	UCHL1
Hs01020073_m1	TRIP13
Hs00989970_m1	PRKCQ
Hs01023894_m1	CDH1
Hs00990732_m1	CD34
Hs01026536_m1	CCNE1
Hs00995282_g1	XRCC6
Hs01027360_g1	PSMA1
Hs01122781_m1	KIF3B
Hs01555410_m1	IL1B
Hs01125548_m1	UBE2L6
Hs01556702_m1	PGR
Hs99999903_m1	ACTB
Hs99999904_m1	PPIA
Hs00152933_m1	TLR3
Hs00157817_m1	GRB2
Hs00152971_m1	TLR7
Hs00159092_m1	MDM4
Hs00153074_m1	ROCK2
Hs00159600_m1	NID1
Hs00153277_m1	CDKN1B
Hs00160947_m1	PTPRN
Hs00176719_m1	LYN
Hs00178463_m1	ROCK1
Hs00176839_m1	CDK17
Hs00178500_m1	TIE1
Hs00176966_m1	PRKAR2B
Hs00178837_m1	CDK16
Hs00176998_m1	PRKCB
Hs00179382_m1	APPL1
Hs00197856_m1	SARS
Hs00221277_m1	SCUBE2
Hs00198091_m1	CGRRF1
Hs00221664_m1	DLG3
Hs00198887_m1	BTG2
Hs00225132_m1	RASL11B
Hs00200720_m1	PHB2
Hs00230762_m1	GPR39
Hs00269977_m1	COX6C
Hs00357891_s1	JUNB
Hs00270424_m1	CCNB2
Hs00359394_g1	MT3
Hs00270768_m1	TLE1
Hs00360961_m1	MAP2K2
Hs00272649_s1	TPBG
Hs00361747_m1	SORT1
Hs00609293_g1	HMBS
Hs00757841_m1	MTDH
Hs00609566_m1	IGF1R
Hs00762869_s1	PKM2
Hs00610263_m1	DVL3
Hs00765730_m1	NFKB1
Hs00610318_m1	TGFBR1
Hs00797747_s1	PFDN4
Hs00965889_m1	NOTCH4
Hs00998018_m1	PDGFRA
Hs00966522_m1	PDGFB
Hs00998426_m1	CAPNS1
Hs00968308_m1	MMP3
Hs01001469_m1	ITGB3
Hs00968567_s1	SFN
Hs01003267_m1	HPRT1
Hs01108847_m1	MMP17
Hs01548508_m1	MAPK8
Hs01114253_m1	TGFBR3
Hs01548894_m1	CDK2
Hs03044281_g1	YWHAZ
Hs99999907_m1	B2M
Hs03063352_s1	BIRC5
Hs00153294_m1	RELA
Hs00161719_m1	SLC1A4
Hs00153380_m1	CCND2
Hs00162613_m1	TCF4
Hs00153451_m1	E2F1
Hs00163761_m1	BTK
Hs00154054_m1	ANXA5
Hs00164932_m1	ICAM1
Hs00177037_m1	PRKD1
Hs00179843_m1	SHH
Hs00177357_m1	RPS6KB1
Hs00180035_m1	NRAS
Hs00177481_m1	AKAP1
Hs00180269_m1	BAX
Hs00177708_m1	TNK1
Hs00180312_m1	MLLT3
Hs00201226_m1	CASC3
Hs00231101_m1	ETV6
Hs00204173_m1	MRPL13
Hs00231476_m1	TFAP2C
Hs00204876_m1	ORC6L
Hs00231780_m1	EGR3
Hs00205854_m1	RHOD
Hs00231908_m1	KDM5A
Hs00273500_m1	STAT5B
Hs00362370_m1	RGS19
Hs00275226_m1	EVL
Hs00364293_m1	CDK1
Hs00276002_m1	SIVA1
Hs00365249_m1	CDKN2B
Hs00277190_s1	JUN
Hs00365799_m1	CAMK2B
Hs00610488_m1	TP53BP2
Hs00811070_m1	MAX
Hs00705164_s1	SOCS1
Hs00822401_m1	CTSL2
Hs00737028_m1	DVL1
Hs00740298_g1	HLA-C
Hs00830226_gH	FTL
Hs00969569_m1	ATP5B
Hs01009038_m1	TCF7L2
Hs00977140_m1	RARB
Hs01013989_m1	STAT1
Hs00981572_m1	RAB6B
Hs01016789_m1	EZH2
Hs00983323_m1	FBP1
Hs01019082_mH	VDAC1
Hs01117001_m1	CUL1
Hs01550934_m1	CDC25B
Hs01121102_g1	MAPRE1
Hs01554450_m1	ERCC3
Hs99999003_m1	MYC
Hs99999018_m1	BCL2
Hs99999911_m1	TFRC
Hs00154457_m1	CIRBP
Hs00165949_m1	TIMP3
Hs00156411_m1	CDC25C
Hs00166169_m1	G6PD
Hs00156455_m1	CENPA
Hs00166294_m1	KRT2
Hs00157213_m1	CTSE
Hs00167402_m1	ACY1
Hs00177774_m1	PKMYT1
Hs00180450_m1	GRB7
Hs00177957_m1	MAPKAPK3
Hs00180533_m1	ARHGEF5
Hs00178297_m1	MAP3K8
Hs00180679_m1	PIK3CA
Hs00178427_m1	LCK
Hs00181211_m1	IGFBP3
Hs00211096_m1	CAMK2A
Hs00232074_m1	MYCN
Hs00212828_m1	PRKD2
Hs00232479_m1	LZTR1
Hs00217947_m1	FGD6
Hs00233722_m1	ITGA3
Hs00220348_m1	CHPT1
Hs00234046_m1	PLCG1
Hs00292627_s1	ZMYND8
Hs00366152_m1	UBE2D2
Hs00355045_m1	CTNNB1
Hs00366363_m1	CRHR1
Hs00355782_m1	CDKN1A
Hs00366502_g1	GNB2
Hs00357608_m1	RHOA
Hs00366740_m1	PPIH
Hs00742533_s1	TUBB2A
Hs00854538_g1	PA2G4
Hs00746337_s1	PRKX
Hs00855044_g1	PHB
Hs00747379_m1	ID2
Hs00869394_s1	ARHGAP5
Hs00754870_s1	DCN
Hs00895608_m1	MX1
Hs00985157_m1	UCHL1
Hs01020073_m1	TRIP13
Hs00989970_m1	PRKCQ
Hs01023894_m1	CDH1
Hs00990732_m1	CD34
Hs01026536_m1	CCNE1
Hs00995282_g1	XRCC6
Hs01027360_g1	PSMA1
Hs01122781_m1	KIF3B
Hs01555410_m1	IL1B
Hs01125548_m1	UBE2L6
Hs01556702_m1	PGR
Hs99999903_m1	ACTB
Hs99999904_m1	PPIA
Hs00152933_m1	TLR3
Hs00157817_m1	GRB2
Hs00152971_m1	TLR7
Hs00159092_m1	MDM4
Hs00153074_m1	ROCK2
Hs00159600_m1	NID1
Hs00153277_m1	CDKN1B
Hs00160947_m1	PTPRN
Hs00176719_m1	LYN
Hs00178463_m1	ROCK1
Hs00176839_m1	CDK17
Hs00178500_m1	TIE1
Hs00176966_m1	PRKAR2B
Hs00178837_m1	CDK16
Hs00176998_m1	PRKCB
Hs00179382_m1	APPL1
Hs00197856_m1	SARS
Hs00221277_m1	SCUBE2
Hs00198091_m1	CGRRF1
Hs00221664_m1	DLG3
Hs00198887_m1	BTG2
Hs00225132_m1	RASL11B
Hs00200720_m1	PHB2
Hs00230762_m1	GPR39
Hs00269977_m1	COX6C
Hs00357891_s1	JUNB
Hs00270424_m1	CCNB2
Hs00359394_g1	MT3
Hs00270768_m1	TLE1
Hs00360961_m1	MAP2K2
Hs00272649_s1	TPBG
Hs00361747_m1	SORT1
Hs00609293_g1	HMBS
Hs00757841_m1	MTDH
Hs00609566_m1	IGF1R
Hs00762869_s1	PKM2
Hs00610263_m1	DVL3
Hs00765730_m1	NFKB1
Hs00610318_m1	TGFBR1
Hs00797747_s1	PFDN4
Hs00965889_m1	NOTCH4
Hs00998018_m1	PDGFRA
Hs00966522_m1	PDGFB
Hs00998426_m1	CAPNS1
Hs00968308_m1	MMP3
Hs01001469_m1	ITGB3
Hs00968567_s1	SFN
Hs01003267_m1	HPRT1
Hs01108847_m1	MMP17
Hs01548508_m1	MAPK8
Hs01114253_m1	TGFBR3
Hs01548894_m1	CDK2
Hs03044281_g1	YWHAZ
Hs99999907_m1	B2M
Hs03063352_s1	BIRC5
Hs00153294_m1	RELA
Hs00161719_m1	SLC1A4
Hs00153380_m1	CCND2
Hs00162613_m1	TCF4
Hs00153451_m1	E2F1
Hs00163761_m1	BTK
Hs00154054_m1	ANXA5
Hs00164932_m1	ICAM1
Hs00177037_m1	PRKD1
Hs00179843_m1	SHH
Hs00177357_m1	RPS6KB1
Hs00180035_m1	NRAS
Hs00177481_m1	AKAP1
Hs00180269_m1	BAX
Hs00177708_m1	TNK1
Hs00180312_m1	MLLT3
Hs00201226_m1	CASC3
Hs00231101_m1	ETV6
Hs00204173_m1	MRPL13
Hs00231476_m1	TFAP2C
Hs00204876_m1	ORC6L
Hs00231780_m1	EGR3
Hs00205854_m1	RHOD
Hs00231908_m1	KDM5A
Hs00273500_m1	STAT5B
Hs00362370_m1	RGS19
Hs00275226_m1	EVL
Hs00364293_m1	CDK1
Hs00276002_m1	SIVA1
Hs00365249_m1	CDKN2B
Hs00277190_s1	JUN
Hs00365799_m1	CAMK2B
Hs00610488_m1	TP53BP2
Hs00811070_m1	MAX
Hs00705164_s1	SOCS1
Hs00822401_m1	CTSL2
Hs00737028_m1	DVL1
Hs00740298_g1	HLA-C
Hs00830226_gH	FTL
Hs00969569_m1	ATP5B
Hs01009038_m1	TCF7L2
Hs00977140_m1	RARB
Hs01013989_m1	STAT1
Hs00981572_m1	RAB6B
Hs01016789_m1	EZH2
Hs00983323_m1	FBP1
Hs01019082_mH	VDAC1
Hs01117001_m1	CUL1
Hs01550934_m1	CDC25B
Hs01121102_g1	MAPRE1
Hs01554450_m1	ERCC3
Hs99999003_m1	MYC
Hs99999018_m1	BCL2
Hs99999911_m1	TFRC
Hs00154457_m1	CIRBP
Hs00165949_m1	TIMP3
Hs00156411_m1	CDC25C
Hs00166169_m1	G6PD
Hs00156455_m1	CENPA
Hs00166294_m1	KRT2
Hs00157213_m1	CTSE
Hs00167402_m1	ACY1
Hs00177774_m1	PKMYT1
Hs00180450_m1	GRB7
Hs00177957_m1	MAPKAPK3
Hs00180533_m1	ARHGEF5
Hs00178297_m1	MAP3K8
Hs00180679_m1	PIK3CA
Hs00178427_m1	LCK
Hs00181211_m1	IGFBP3
Hs00211096_m1	CAMK2A
Hs00232074_m1	MYCN
Hs00212828_m1	PRKD2
Hs00232479_m1	LZTR1
Hs00217947_m1	FGD6
Hs00233722_m1	ITGA3
Hs00220348_m1	CHPT1
Hs00234046_m1	PLCG1
Hs00292627_s1	ZMYND8
Hs00366152_m1	UBE2D2
Hs00355045_m1	CTNNB1
Hs00366363_m1	CRHR1
Hs00355782_m1	CDKN1A
Hs00366502_g1	GNB2
Hs00357608_m1	RHOA
Hs00366740_m1	PPIH
Hs00742533_s1	TUBB2A
Hs00854538_g1	PA2G4
Hs00746337_s1	PRKX
Hs00855044_g1	PHB
Hs00747379_m1	ID2
Hs00869394_s1	ARHGAP5
Hs00754870_s1	DCN
Hs00895608_m1	MX1
Hs00985157_m1	UCHL1
Hs01020073_m1	TRIP13
Hs00989970_m1	PRKCQ
Hs01023894_m1	CDH1
Hs00990732_m1	CD34
Hs01026536_m1	CCNE1
Hs00995282_g1	XRCC6
Hs01027360_g1	PSMA1
Hs01122781_m1	KIF3B
Hs01555410_m1	IL1B
Hs01125548_m1	UBE2L6
Hs01556702_m1	PGR
Hs99999903_m1	ACTB
Hs99999904_m1	PPIA
Hs00169258_m1	F2R
Hs00173611_m1	KLK10
Hs00169491_m1	STK3
Hs00173872_m1	ODZ1
Hs00169777_m1	PECAM1
Hs00174128_m1	TNF
Hs00170723_m1	TYRO3
Hs00174164_m1	CSF1
Hs00181605_m1	ADM
Hs00187740_m1	PRC1
Hs00181881_m1	ITPR1
Hs00189535_m1	FUT8
Hs00182082_m1	MYD88
Hs00191583_m1	LITAF
Hs00182314_m1	RASGRF1
Hs00192202_m1	MARS
Hs00234140_m1	CCL2
Hs00248075_m1	BBC3
Hs00234253_m1	TGFBR2
Hs00248563_m1	PLCB1
Hs00234579_m1	MMP9
Hs00254392_m1	EGLN1
Hs00234864_m1	HMMR
Hs00255603_m1	GNAS
Hs00374226_m1	NR4A1
Hs00427621_m1	TBP
Hs00377726_m1	PTGS1
Hs00428286_g1	ELK1
Hs00381676_m1	MLF1IP
Hs00531110_m1	FAS
Hs00382970_m1	PFDN5
Hs00533560_m1	TNFRSF1A
Hs00899658_m1	MMP1
Hs00943652_m1	ABL2
Hs00903413_m1	CYP19A1
Hs00944794_m1	CTNNA1
Hs00907398_m1	MCM4
Hs00946084_g1	HSPA5
Hs00909569_g1	ATF4
Hs00947994_m1	CDC25A
Hs01028811_g1	EIF5
Hs01063168_m1	AXIN2
Hs01032443_m1	MKI67
Hs01070442_m1	SPINT2
Hs01032884_m1	RAC2
Hs01072206_m1	RAB27B
[truncated: 594 more rows]
