# Supplementary material for: An Examination of the Anti-Cancer Properties of Plant Cannabinoids in Preclinical Models of Mesothelioma
Source: Cancers (Basel). 2022 Aug 5;14(15):3813. doi: 10.3390/cancers14153813 (PMC9367527; doi:10.3390/cancers14153813)
Supplement: Supplementary file 1 [file cancers-14-03813-s001.zip › Table S3 Open Array gene expression results.xlsx]

## Sheet: CBD
Fold change gene expression results
Log 2 FC gene expression
Gene target	H2542	MSTO
AARS	2.57701	2.08746
ABCB1	3.05866	-0.242977
ABCC4	-1.0862	0.404903
ABCG2	1.06143	-0.103147
ABI2	-0.459973	-0.00578236
ABL1	0.409255	-0.362158
ABL2	1.73682	0.0935602
ACADS	-0.153607	0.941106
ACTB	-3.15843	-1.18771
ACY1	0.271426	1.05589
ADM	1.18206	-0.321928
AGFG1	0.566572	0.0057592
AK1	-0.137648	1.25157
AKAP1	-0.101598	-0.0174171
AKT1	-0.588574	-0.72738
ALB	3.11636	#NUM!
ALDH4A1	0.983313	0.756169
ALDH6A1	2.18365	1.29866
ANPEP	-0.545824	#NUM!
ANXA5	1.03633	0.435095
ANXA7	0.166073	0.619178
AP2B1	0.108357	0.455229
AP2M1	-1.18442	-0.643856
APC	0.248535	-0.531156
APPL1	-0.172994	1.00791
AR	-1.03505	#NUM!
ARHGAP5	0.0922074	1.26903
ARHGEF5	0.703987	1.63645
ARID4A	1.20414	0.0648829
ARMC1	0.500802	-0.384584
ASNS	2.70044	2.48826
ASPM	-2.53116	-2.18442
ATAD2	-2.62593	-2.25154
ATF4	2.23389	0.940355
ATM	1.38847	0.725959
ATP5B	-0.793357	#NUM!
ATP5O	-0.32916	0.327687
AURKA	-2.45799	-3.1976
AXIN2	1.14209	-0.186065
AXL	-1.662	-0.473931
B2M	-0.232769	0.340277
BAG1	0.83996	0.299831
BAG3	1.7433	-0.732165
BARD1	-3.68038	-1.5951
BAX	-0.120294	-0.174621
BBC3	4.10484	1.7264
BCAR1	0.0758749	-0.567041
BCL2	0.495695	0.821302
BCL2L1	0.580145	-0.234465
BCL2L11	1.71105	0.651683
BHLHE40	2.94879	2.02963
BIRC5	-3.49818	-0.701342
BLMH	-0.438307	-1.02327
BMP6	0.767231	0.252173
BNIP3	1.20351	0.451013
BRAF	1.80074	0.901494
BRCA1	-1.39973	-0.229382
BRCA2	3.0054	-1.37333
BTG2	1.57821	-0.0740006
BUB1	-2.42663	-2.16488
CA9	-1.47393	#NUM!
CAMK2A	-1.84684	#NUM!
CAMK2B	1.95903	3.93612
CANX	0.0285691	0.660837
CAPN1	-1.09851	-0.897006
CAPNS1	-0.496142	-0.0603973
CARD17	3.41468	#NUM!
CASC3	0.712816	-0.103147
CASP8	0.851199	-0.698998
CBFB	-0.599462	-1.00289
CBLB	2.2228	1.65581
CCL2	-4.15843	#NUM!
CCNA2	-3.4112	-2.00578
CCNB1	-3.55639	-2.41889
CCNB2	-2.60823	-2.39593
CCND1	-1.35476	-1.09542
CCND2	#NUM!	-0.0724828
CCND3	-0.813499	-1.36587
CCNE1	-0.805913	-1.3474
CCT5	-0.668868	-0.599462
CD24	2.51475	4.18761
CD44	-0.634867	-1.6529
CD59	-2.16488	-2.25843
CD70	0.941858	1.36569
CDC20	-1.61264	-2.34373
CDC25A	-1.662	-2.62593
CDC25B	-2.60823	-1.32554
CDC25C	-2.45008	-0.778432
CDC42	-0.281036	-1.49818
CDC42BPA	0.321928	0.356144
CDK1	-3.30757	-1.56064
CDK13	1.82089	0.790772
CDK16	0.0496307	0.0745054
CDK17	1.92029	-0.177882
CDK18	2.18872	2.00504
CDK2	-3.47393	-1.36959
CDK4	0.0538064	0.385155
CDK5	-1.72738	0.504875
CDK9	1.07861	0.186501
CDKL1	0.742437	0.795767
CDKN1A	3.47145	0.769772
CDKN1B	1.61495	0.95977
CDKN1C	0.793272	1.21164
CDKN2A	#NUM!	1.70797
CDKN2D	-0.386468	0.528071
CEBPG	2.97435	8.08207
CENPA	-1.61264	0.311503
CGRRF1	1.7845	0.91533
CHAF1A	-1.36216	-1.02034
CHPT1	-0.793357	0.0299829
CIB1	0.784923	-0.00433462
CIRBP	2.69711	1.24367
CKS2	-1.40736	-0.83908
CLTC	0.344828	0.392867
CNBP	0.710173	-0.239566
COL1A1	-3.02327	-2.55639
COL4A2	-1.486	-1.70369
COL6A3	#NUM!	0.737254
COX6C	-0.577767	0.671746
COX7A2	-0.155213	0.332278
CRAT	-0.0664274	0.959028
CSF1	-1.82113	-0.166503
CSNK1G2	-0.2567	0.31034
CTNNA1	0.445727	-0.562772
CTNNB1	-0.16004	-0.442222
CTPS	-1.39973	1.99277
CTSB	-1.30045	0.85599
CTSC	-2.11404	-1.62593
CTSL2	-0.678072	-3.75633
CXCL12	-2.699	#NUM!
CYC1	-0.325539	-0.0543923
CYCS	0.0384361	-0.610433
CYR61	-2.20423	-0.354759
DCK	-1.07704	-1.23107
DCN	#NUM!	4.03245
DDX10	0.582074	-0.295128
DEGS1	-0.878321	-0.766112
DEK	-0.452057	-0.805913
DEPDC1	-2.32916	-1.32554
DHCR7	-1.38836	1.56852
DHRS2	3.31832	-0.913216
DHX8	0.659925	-0.100051
DLG3	0.675364	0.889084
DTL	-1.54793	-1.46196
DVL1	0.136191	-0.202572
DVL3	0.57918	-0.0203404
E2F1	-0.808437	-1.28279
E2F3	0.0440444	-0.0454315
E2F5	2.2032	0.984042
ECT2	-0.951764	-1.56918
EGF	-1.48197	2.37072
EGFR	0.734655	0.474047
EGLN1	-0.657445	-1.26882
EGR1	2.83471	1.45207
EGR3	0.10165	-0.680382
EIF2C2	0.671746	-0.246395
EIF5	0.948601	-0.0424568
ELK1	0.163499	-0.0985055
EPHA2	-1.23107	-0.756331
ERBB2	0.120352	0.206643
ERBB3	-2.80591	1.42707
ERCC3	0.725959	-0.351074
ESM1	1.98368	-1.67116
ETV1	#NUM!	-0.0380064
ETV3	2.81742	-0.0409718
ETV6	0.0621218	-0.123434
EVL	-1.71786	0.442545
EXT1	0.0172092	-0.813499
EZH2	-0.72261	-1.16488
EZR	-0.258425	-0.655172
F2R	-0.954557	0.0758749
FAS	0.21661	-1.26534
FASTK	1.9782	1.44784
FBN1	-3.77596	-1.5187
FBN2	0.515006	2.76553
FBXO5	-0.33825	-0.905088
FES	1.22651	-0.539519
FGD6	1.81639	-0.75877
FGF3	0.695103	#NUM!
FGF8	-0.112475	0.67717
FGFR1	0.827006	0.261832
FGR	0.151859	#NUM!
FKBP8	0.0342158	-0.910502
FLT1	#NUM!	0.132248
FN1	0.342555	1.58207
FOS	-3.42663	0.308011
FOSL2	0.113701	-0.39973
FOXO1	1.64386	0.633199
FTL	0.733788	1.22959
FUT8	-1.00578	-1.5951
FYN	1.42653	1.06074
FZD2	0	0.414677
FZD5	1.19535	0.734655
FZD9	3.93941	0.0635029
G6PD	-1.32554	0.718964
GAPDH	-0.891643	0.041243
GBE1	0.632268	0.938098
GCN1L1	0.532068	0.116365
GDF15	6.85363	4.24092
GGH	-2.34373	-1.92139
GMPS	-0.232769	-0.364013
GNA13	1.24306	0.321928
GNAS	-0.204233	-0.279284
GNAZ	-0.954557	1.89724
GNB2	-0.158429	-0.873027
GNB2L1	0.736388	0.934328
GPR126	-1.63039	-0.880976
GPR180	0.269033	-0.158429
GPR39	-0.395929	-0.62371
GRB2	0.0827026	-1.00289
GRB7	1.99095	3.94551
GSK3A	0.725959	-0.139236
GSK3B	-0.139236	-0.107803
GSPT1	-0.270556	-0.365871
GSTM3	-0.685014	1.34426
GTF2I	-0.708396	0.333424
GUSB	-0.190997	-0.0831412
H2AFZ	-2.68038	-1.45403
HADHA	0.0384361	0.60027
HDAC1	-0.859876	-0.678072
HDGF	-1.35107	-0.172994
HLA-C	#NUM!	0.301002
HMBS	0.109695	0.725087
HMGN2	-2.12029	0.329985
HMMR	-2.87832	-2.17137
HPRT1	-1.5951	-0.37707
HRAS	-1.40354	0.469886
HSPA4	0.108357	-0.564905
HSPA5	3.58724	2.14209
HSPA8	-0.169745	-0.0394883
HSPB1	0.10165	0.473008
HSPH1	1.52005	-0.575615
HYAL1	1.77146	-0.430509
HYOU1	2.50437	1.0072
ICAM1	0.623867	0.690641
ID1	-4.50635	-1.92139
ID2	-2.23786	-1.23107
IDUA	1.01721	3.43483
IER3	0.885184	1.30743
IFITM1	-0.0892673	2.0036
IFNGR1	0.350497	0.899176
IGF1R	0.635987	0.847195
IGF2	1.86156	0.92524
IGF2R	0.0827026	0.721591
IGFBP3	-2.02327	-0.694321
IGFBP4	-1.11092	-1.65745
IGFBP5	0.00432164	#NUM!
IL1B	2.43909	-0.284546
INSR	1.44255	1.57628
IP6K2	-0.0232697	0.35727
IRF3	-0.99137	0.67717
ITGA3	-1.04097	0.113701
ITGAV	-1.28279	1.19661
ITGB3	0.0229004	0.68437
ITGB4	-0.286304	1.3202
ITPR1	2.52331	0.144046
JAK1	0.207893	0.920674
JUN	1.66448	-0.628162
JUNB	1.2135	0.688852
JUND	0.614474	2.77167
KAT2A	-1.13924	-0.112475
KDM5A	1.74631	0.0100636
KIF14	-1.70369	-1.45403
KIF21A	0.864731	0.149259
KIF3B	0.207893	-0.155213
KITLG	0.563646	0.335712
KLK10	0.862352	-0.358454
KPNA2	-2.191	-1.8997
KRAS	-0.246395	-0.251539
KRT18	-2.33643	-1.46196
KRT19	-0.870387	2.54893
KRT2	3.18713	#NUM!
LAMB1	-2.64386	-0.142417
LAMP2	-0.434403	0.397255
LCN2	5.66235	2.06626
LDHA	-2.8365	-0.364013
LEF1	0.177599	0.422233
LIMK1	-0.479955	-0.314733
LITAF	0.742437	-0.202572
LONP1	1.36233	1.30509
LRPAP1	-0.637109	-0.409278
LYN	-0.610433	-0.207561
LZTR1	3.29837	0.15056
M6PR	0.486457	0.334568
MAD2L1	-1.39973	-0.652901
MAP2K1	0.897628	-0.673463
MAP2K2	0.349365	0.228973
MAP2K4	-0.494109	-0.483985
MAP3K5	0.906121	1.25338
MAP3K8	0.77905	-0.599462
MAPK12	-0.121863	0.375179
MAPK13	0.533065	1.09626
MAPK3	-1.87832	0.687956
MAPK8	0.767231	-1.35845
MAPKAPK3	1.11437	-0.246395
MAPRE1	0.0538064	-0.403542
MARS	3.03245	0.962734
MAS1	#NUM!	4.50061
MATN3	-0.75877	-0.258425
MAX	1.32884	-3
MCC	1.3488	0.252173
MCCC1	1.39122	-0.00723156
MCM2	-2.44222	-1.36216
MCM4	-2.87832	-2.26534
MCM6	-2.16488	-1.70369
MDM2	0.45628	0.411426
MDM4	2.17632	1.79494
MELK	-1.75633	-0.771027
MET	-1.17137	-0.131313
MGST1	-1.01742	2.3083
MIB1	-0.184425	0.941858
MKI67	-3.55639	-2.79586
MLF1IP	-1.0862	-1.53116
MLLT10	0.929034	1.11902
MLLT3	1.14796	-0.826233
MME	2.23909	1.36513
MMP1	4.87848	1.05658
MMP11	0.593593	0.958286
MMP14	-1.74662	-0.362158
MMP17	0.549916	1.27083
MMP2	-2.46594	1.05866
MMP28	1.11036	#NUM!
MMP3	1.55631	0.525067
MMP9	1.64062	2.23297
MRPL13	-0.307573	-0.39973
MSH2	-1.25843	-0.957356
MSH6	-0.715486	-1.59946
MTDH	0.43189	0.279768
MTOR	0.725087	0.0129261
MX1	1.16607	0.799916
MYB	#NUM!	-1.73216
MYBL2	-3.36587	-2.55639
MYC	2.14078	2.07108
MYD88	-0.436354	-0.72738
MYRIP	3.29602	1.02219
NDC80	-3.03505	-0.968605
NDRG1	3.21661	2.6597
NF1	0.549916	0.305679
NF2	-1.60823	-1.50635
NFKB1	1.48027	-0.436354
NFKB2	1.976	0.691534
NID1	-3.18442	-0.83908
NINJ1	-0.104697	1.20914
NME1	-0.793357	0.159629
NME3	-1.0145	1.28451
NMU	-3.07097	-2.88897
NOTCH1	-0.0709665	0.0565835
NOTCH2	-0.0724828	-0.401635
NPM1	-0.715486	0.351628
NQO1	-0.753896	1.07451
NR1D1	3.66357	1.36289
NR2F6	0.60027	-0.22095
NR4A1	0.761285	0.16221
NRAS	-0.321928	-0.741783
NRG1	0.841571	0.550901
ORC6L	-0.531156	-1.80088
OSM	0.982583	#NUM!
OXCT1	-1.24127	#NUM!
PA2G4	-0.805913	-0.533242
PABPC1	0.180148	0.699552
PAK1	0.255803	1.88362
PCNA	-3.05889	-1.77596
PDGFA	0.62854	0
PDGFB	-0.0424568	0.764686
PDGFRA	#NUM!	0.799087
PDPK1	0.604071	-0.136062
PEA15	0.428678	-0.0785636
PECAM1	-0.554273	-1.00868
PECI	-1.7084	-1.31833
PFDN4	0.202888	0.0881415
PFDN5	-0.0938791	0.336855
PFKP	-0.579922	-0.397828
PGAM1	-1.98279	-1.35107
PGK1	-0.880976	-0.158429
PGR	#NUM!	-1.27579
PHB	-0.72738	-0.438307
PHB2	-0.013043	0.0328061
PIK3CA	0.289244	-0.0634092
PIK3CB	0.344828	-0.272297
PIK3CD	2.3251	0.407081
PIK3CG	#NUM!	-0.773492
PIR	-0.117161	1.08542
PKM2	-1.36959	-0.413115
PKMYT1	-1.5649	-1.75147
PLCG1	0.481299	-0.985645
PLCG2	4.73915	2.36709
PLK2	0.939603	0.812293
POLR2A	0.403813	-0.75877
PPARG	1.67582	0.284514
PPIA	-1.85726	-0.212568
PPIH	-0.0276749	-0.662003
PPP2R5A	0.0454429	0.113701
PRAME	#NUM!	-1.26882
PRC1	-3.18442	-2.17137
PRDX2	-1.43831	-0.013043
PRDX4	0.385155	-1.02915
PRKACA	-1.30757	-1.08009
PRKAR1A	0.0229004	0.0157831
PRKAR2B	1.12367	-0.803393
PRKCA	-0.529073	-0.118727
PRKCD	0.639695	-0.110916
PRKCE	0.794936	1.91991
PRKCG	0.630405	-1.42663
PRKCQ	#NUM!	0.328837
PRKCZ	1.14991	0.606916
PRKD1	1.53007	-0.394032
PRKD2	0.434028	-0.803393
PRKX	-0.0513992	0.222805
PRNP	-0.724993	0.181421
PSMA1	-0.145605	-0.0558912
PTEN	-0.0144996	-0.142417
PTGS1	2.20914	#NUM!
PTMA	-1.77103	-0.265345
PTN	-0.110916	-2.02915
PTPRN	1.01078	3.42465
RAB27B	2.20602	1.00935
RAB5A	2.08712	0.446786
RAB6B	-0.535332	1.23634
RAC1	-0.924125	0.227741
RAC2	-0.612637	-1.51046
RAD21	-0.164884	-1.12658
RAD50	1.05102	0.732052
RAD51	-0.153607	-1.92139
RAF1	0.259423	-0.577767
RALBP1	-0.0694519	0.448901
RAP1A	-0.210897	-0.210897
RARB	1.01721	-3.45799
RASGRF1	#NUM!	2.25369
RASL11B	#NUM!	-1.30757
RB1	0.321928	-0.780909
RBBP4	-0.610433	1.44837
RBL2	-0.215915	0.724214
REL	0.973795	0.395063
RELA	1.9092	0.513996
RELB	1.66129	0.475085
RET	0.199123	0.580145
RFC2	-1.074	-1.26188
RFC4	-1.38458	-0.768568
RGS19	-0.691989	0.112366
RHOA	-0.382701	-0.334607
RHOB	2.04649	1.00504
RHOC	-0.0877334	-0.0985055
RHOD	-0.982791	#NUM!
RIPK1	1.60027	0.586885
ROCK1	0.328837	0.302173
ROCK2	0.280956	-0.316528
RPLP0	0.57628	0.720716
RPN2	0.0949116	0.45628
RPS6KB1	-0.148801	-0.39973
RRM2	-4.8365	-1.85204
SARS	1.50995	0.917623
SCUBE2	1.87617	-2.25154
SEC14L2	-1.23107	-0.24127
SELENBP1	-1.80591	-0.296899
SEMA4D	0.0398403	-0.204233
SEPP1	3.0365	#NUM!
SERPINH1	-0.426625	0.0662615
SFN	0.0867838	1.06764
SFPQ	-2.22432	-0.859876
SFRS7	-0.452057	-0.77596
SHB	-0.657445	-0.37707
SHH	1.46048	#NUM!
SIAH2	1.84479	-0.309359
SIVA1	-0.295128	-0.891643
SKI	-0.179515	0.0881415
SKIL	0.0579701	-0.0350469
SLC16A1	-0.155213	0.385155
SLC1A4	1.58015	3.28821
SLC20A1	0.390668	0.567545
SLC2A3	#NUM!	2.18967
SLC7A1	0.984042	0.868687
SMAD1	0.479231	0.282143
SMO	-2.6529	-0.205896
SNAI2	-0.0892673	0.313826
SND1	1.51904	0.136191
SOCS1	2.42868	0.805705
SOCS3	-0.253257	-0.347399
SOD1	-0.926865	0.228973
SORT1	-2.23786	-0.488026
SP1	1.10969	0.352758
SPINT2	0.0989585	1.30334
SPP1	-1.04394	3.01096
SPRY2	3.46349	-0.508403
SRC	0.467801	0.676267
STAT1	0.0676387	-0.0740006
STAT2	1.3774	2.15834
STAT3	0.22033	0.475085
STAT5B	0.543001	0.319618
STC1	#NUM!	-3.662
STK3	1.04124	-0.270556
STK32B	0.276199	2.14828
STMN1	-3.17137	-0.077041
STX1A	2.31817	-0.37146
SYNCRIP	0.901494	-1.01159
TBL3	0.119024	0.0426443
TBP	1.11137	-0.289827
TBX3	1.8953	0.175045
TCF3	-1.27579	-0.428566
TCF4	#NUM!	-1.34008
TCF7L2	-0.217591	-2.1016
TFAP2C	1.23082	#NUM!
TFDP2	-0.481968	0.67084
TFRC	-0.239566	0.00288251
TGFA	0.10165	1.14405
TGFB1	-1.37333	0.299831
TGFB2	-1.03801	0.68437
TGFB3	#NUM!	-1.14561
TGFBI	-2.50635	-1.98279
TGFBR1	1.07382	0.616358
TGFBR2	-0.147202	-0.816037
TGFBR3	0.331132	-0.118727
THBS1	-3.14561	-2.22432
TIE1	0.636915	0.755315
TIMP1	-0.516636	-0.541618
TIMP3	-0.962969	-0.924125
TJP1	1.25278	0.481299
TK1	-2.60823	-2.08314
TLE1	1.12697	0.385155
TLR2	2.06108	#NUM!
TLR3	0.786596	0.123004
TLR4	0.584	-0.195946
TLR9	2.94935	#NUM!
TMEFF1	1.82497	0.40163
TMEM45A	2.29514	1
TNFRSF10A	4.13939	0.124328
TNFRSF10B	2.11237	0.798258
TNFRSF1A	-1.36401	0.456806
TNFRSF1B	-0.531156	-0.816037
TNK1	0.422233	#NUM!
TNK2	0.0214797	0.335712
TOB1	-0.608232	0.0827026
TP53	#NUM!	0.914565
TP53BP2	1.59789	#NUM!
TP53I3	-1.47794	-0.788365
TPBG	0.68437	1.98039
TPT1	1.41359	1.45733
TRADD	0.856787	1.38239
TRAM1	1.35502	1.36289
TRIP13	-1.85204	-1.54372
TRRAP	-0.0454315	0.391768
TSG101	1.08678	0.885184
TUBA4A	-1.9885	-0.471929
TUBB2A	0.408168	-0.567041
TXNRD1	-0.823677	1.27977
TYK2	0.399445	-0.327348
TYRO3	-1.0619	-0.852042
UBC	2.54251	1.84318
UBE2L6	-0.139236	0.537047
UCHL1	0.304511	0.803227
UCHL5	0.722466	-0.612637
UHMK1	-0.494109	0.0384361
USP7	0.151859	-0.354759
VDAC1	-0.982791	-2.39593
VEGFA	2.72683	1.75702
VIM	0.289244	0.261832
WISP1	0.919149	-0.172994
WNT5A	-0.878321	0.447844
WT1	-0.187707	-0.962969
XRCC1	-0.545824	-0.494109
XRCC3	-1.2723	-0.785875
XRCC4	-0.367732	-0.401635
XRCC5	-1.22095	-0.450084
XRCC6	-0.60165	-0.448115
YBX1	-0.182786	0.319618
YES1	0.257011	-0.409278
YWHAB	-0.520769	0.155749
YWHAZ	-0.101598	0.465713
ZMYND8	0.304511	0.187768

## Sheet: CBG
Fold change gene expression results
Log 2 FC gene expression
Gene target	H2452	MSTO
18S	0.0214797	1.52907
AARS	0.680774	2.82191
ABCC4	-0.150401	0.211635
ABCG2	0.793272	-0.114035
ABI2	-0.926865	-0.448115
ABL1	-0.395929	-0.428566
ABL2	1.01578	0.984772
ACADS	-0.0709665	0.279768
ACTB	-2.23786	-1.85726
ACY1	0.10165	0.803227
ADM	0.586885	1.20226
AGFG1	0.483364	-0.352916
AK1	-0.281036	-0.0785637
AKAP1	-0.846843	-0.535332
AKT1	-0.785875	-0.708396
ALDH4A1	0.831067	-0.0262051
ALDH6A1	1.86908	1.53506
ANPEP	-1.09851	-1.13289
ANXA5	0.939603	0.314986
ANXA7	0.592636	0.504875
AP2B1	0.284514	0.191563
AP2M1	-0.694321	-0.610433
APC	-0.185284	-0.386992
APPL1	-0.537424	-0.761213
ARHGAP5	0.204141	0.705757
ARHGEF5	1.93546	0.454176
ARID4A	0.851199	-0.332789
ARMC1	-0.0439433	-0.450084
ASNS	3.1235	2.98076
ASPM	-1.38458	-2.05289
ATAD2	-2.86775	-2.40354
ATF4	1.63691	1.2969
ATM	0.164786	1.18015
ATP5B	-0.621488	-0.619271
ATP5O	0.00575927	-0.21927
AURKA	-1.2863	-1.64386
AXIN2	2.01935	0.206643
AXL	-0.671164	-1.074
B2M	0.572847	0.756922
BAG1	0.518031	-0.0484122
BAG3	0.496718	-0.821126
BARD1	-2.77596	-2.04097
BAX	0.291604	-0.147202
BBC3	3.68381	1.98149
BCAR1	-0.390245	-0.8863
BCL2	-0.374619	0.978348
BCL2L1	0.493647	-0.0247367
BCL2L11	-0.110916	1.60265
BHLHE40	1.33857	1.81435
BIRC5	-2.25643	-1.84903
BLMH	-0.522841	-1.1078
BMP6	-0.436354	0.319618
BNIP3	0.348232	0.0894982
BRAF	0.041243	1.07793
BRCA1	-1.25154	-1.41504
BRCA2	2.04019	-1.2109
BTG2	1.42868	1.04124
BTK	5.3618	0.435095
BUB1	-1.05289	-1.76121
CAMK2B	2.29219	2.38322
CANX	0.69332	1.14274
CAPN1	-0.490051	-0.687335
CAPNS1	-0.163268	0.0799754
CASC3	0.518031	-0.0785637
CASP8	-0.184425	-0.33825
CBFB	-0.946194	-0.318326
CBLB	1.8844	2.90053
CCL2	-2.85726	0.24245
CCNA2	-3.32193	-2.16488
CCNB1	-2.07097	-2.36587
CCNB2	-1.43051	-1.9885
CCND1	-2.76611	-1.5187
CCND2	2.46884	-0.345564
CCND3	-1.11092	-1.62593
CCNE1	-1.64386	-1.75147
CCT5	-0.481969	-0.907793
CD24	1.95866	1.07108
CD44	-0.481969	-1.25154
CD59	-1.00289	-2.2723
CD70	-0.42082	0.46048
CDC25A	-2.38836	-1.92139
CDC25B	-0.249822	0.27858
CDC25C	-0.753896	-1.486
CDC42	-0.749038	-1.15843
CDC42BPA	0.255803	0.720716
CDK1	-2.39593	-2.2109
CDK13	1.56657	0.620117
CDK16	0.178874	-0.345564
CDK17	1.29572	-0.492079
CDK18	1.95382	1.86156
CDK2	-2.96578	-2.20423
CDK4	0.0107797	-0.231966
CDK5	-2.32193	-0.0291463
CDK9	0.763836	-0.0320936
CDKL1	0.0908534	0.297485
CDKN1A	3.74631	1.25761
CDKN1B	0.739848	1.23327
CDKN1C	3.05259	1.68392
CDKN2D	-0.37707	-0.475936
CEBPG	2.73227	1.43189
CENPA	-0.330973	-2.59074
CGRRF1	2.0635	0.674461
CHAF1A	-1.36587	-2.01742
CHPT1	-0.260152	0.104337
CIB1	0.783247	-0.24127
CIRBP	2.00612	1.2345
CKS2	-1.12029	-1.96016
CLTC	0.491597	-0.137648
CNBP	0.379621	-0.14401
COL1A1	-2.33643	-0.45799
COL4A2	-0.0174171	-1.2969
COL6A3	0.454176	0.0356239
COX6C	-0.0724828	-0.0144996
COX7A2	-0.131313	-0.309359
CRAT	0.109695	1.1375
CSF1	-0.951764	0.92372
CSF1R	-2.54793	0.641546
CSNK1G2	0.253384	-0.181149
CTNNA1	0.871844	0.231432
CTNNB1	-0.306653	-0.424437
CTPS	-1.12658	-1.14242
CTSB	0.140124	0.227741
CTSC	-1.662	-1.31115
CTSL2	-0.12658	-0.103147
CUL1	-0.556393	0.0731347
CXCL12	-0.246395	2.61377
CYC1	-1.32193	-0.209228
CYCS	-0.0923402	-1.30401
CYR61	-1	-0.323733
DCC	-3.68038	0.890641
DCK	-1.02621	-1.75633
DCN	4.24291	2.67852
DDX10	-1.40736	0.0989585
DEGS1	-0.356606	-1.04097
DEK	-0.788365	-1.34373
DEPDC1	-1.68501	-1.8997
DHCR7	-0.60165	-0.312939
DHRS2	2.52306	1.15251
DHX8	0.397255	-0.415037
DLG3	0.900722	1.41576
DTL	-2.4112	-2.699
DVL1	0.194172	-0.37025
DVL3	1.15704	0.158337
E2F1	-1.77103	-2.51457
E2F3	0.191563	-0.388355
E2F5	1.05102	0.570463
ECT2	-0.50226	-1.7084
EGFR	0.590722	0.697774
EGLN1	-0.403542	-0.910502
EGR1	1.48954	0.449957
EIF2C2	0.818851	-0.573467
EIF5	1.14796	0.295135
ELK1	0.52306	0.261832
EPHA2	-1.23447	-2.07704
ERBB2	-1.20756	0.718088
ERBB3	-0.545824	-0.244685
ERBB4	1.88869	1.19093
ERCC3	0.267835	-0.481969
ESM1	-2.12658	-2.61706
ETV3	1.00504	0.481299
ETV6	0.524064	0.531069
EVL	-1.40736	-0.0908029
EXT1	0.0524159	-0.318326
EZH2	-1.04394	-1.662
EZR	-0.76366	-0.373327
F2R	-2.4344	0.189034
FAS	1.32193	0.434028
FASTK	1.86631	0.267835
FBN1	-1.8365	0.171207
FBN2	-0.26708	1.976
FBXO5	5.04736	-1.64386
FES	1.23573	0.253384
FGD6	2.0229	-0.985645
FGFR1	0.124328	-0.309359
FKBP8	-0.454032	-0.477944
FLT1	2.8486	1.05102
FN1	-1.11092	1.59503
FOS	1.12499	1.78199
FOSL2	-0.99137	-0.641604
FOXO1	1.20664	0.531069
FTL	1.71853	1.25459
FUT8	-0.72261	-1.12658
FYN	1.04824	1.89879
FZD2	-2.02915	0.349365
FZD5	0.756169	0.68437
FZD9	3.38791	0.116365
GAPDH	-0.343732	-0.200913
GBE1	-0.524915	1.54003
GCN1L1	0.836732	-0.390245
GDF15	5.6372	3.50665
GGH	-1.36216	-1.79586
GMPS	-0.300448	-0.943416
GNA13	1.37351	0.318461
GNAS	0.0867838	0.509949
GNAZ	-2.11404	0.941858
GNB2	0.0635029	0.271426
GNB2L1	-0.739372	0.960512
GPR126	-1.53116	-0.915936
GPR180	-0.289827	-0.643856
GPR39	-1.486	-1.11404
GRB2	-0.0335695	-0.790859
GRB7	0.817214	0.0172093
GSK3A	-0.687335	-0.200913
GSK3B	-0.597278	-0.0740006
GSPT1	-0.237864	-0.717857
GSTM3	0.448901	0.474047
GTF2I	-0.72977	-0.176251
GUSB	-0.328725	0.0754358
H2AFZ	-1.76611	-2.07704
HADHA	0.267835	-0.0439433
HDAC1	-0.813499	-1.06794
HDGF	-2.02327	0.0313952
HMBS	-0.442437	0.152559
HMGN2	-0.744197	-0.720232
HMMR	-0.597278	-1.38458
HPRT1	-1.60361	-0.928369
HRAS	-0.84944	-0.249822
HSPA4	0.0894982	-0.99137
HSPA5	2.22527	2.95736
HSPA8	-0.354759	-0.340075
HSPB1	-3	0.0565835
HSPH1	-0.169745	-0.785875
HYAL1	-1.2863	2.89743
HYOU1	2.06661	1.58688
ICAM1	1.60217	2.60265
ID1	-2.58208	-1.33279
ID2	-1.1016	-0.924125
IDUA	2.19409	3.62012
IER3	-0.327348	0.16221
IFITM1	0.559737	1.87027
IFNGR1	-0.0232698	0.968644
IGF1R	-0.753896	1.01436
IGF2	2.52256	0.689746
IGF2R	0.668119	0.621993
IGFBP3	-0.234465	0.872632
IGFBP4	-0.496142	-1.40736
IL1B	-0.614845	-1.486
INSR	1.05658	1.1564
IP6K2	0.480265	0.666302
IRF3	-1.15843	-0.248108
ITGA3	0.0949116	-0.12658
ITGAV	-1.61706	0.640621
ITGB3	-0.0424568	-0.0785637
ITGB4	1.44467	2.9501
ITPR1	1.55287	1.66993
JAK1	0.31034	0.671746
JUN	1.28425	0.738735
JUNB	1.63923	1.36569
JUND	0.347099	-0.675765
KAT2A	-2.24469	-0.103147
KDM5A	1.48285	0.0867838
KIF14	-1.11404	-1.52699
KIF21A	0.713696	0.00863031
KIF3B	0.475085	-0.448115
KITLG	0.458382	0.696884
KPNA2	-2.36587	-1.93788
KRAS	-0.535332	-0.444184
KRT18	-1.51457	-1.45008
KRT19	-2.15843	2.76129
LAMB1	-1.78091	-0.314733
LAMP2	0.249749	0.469886
LCN2	3.59383	5.27128
LDHA	-1.18442	-1.662
LEF1	0.682573	0.206643
LIMK1	-0.99137	-1.60384
LITAF	-0.0985055	-0.498179
LONP1	0.153157	1.13488
LRPAP1	0.169925	-0.401635
LYN	0.321928	-0.343732
LZTR1	0.762987	0.452068
M6PR	0.219091	-0.181149
MAD2L1	-1.59946	-2.00578
MAP2K1	0.343692	-0.685014
MAP2K2	0.754642	0.201841
MAP2K4	0.0114956	-0.639355
MAP3K5	0.0799754	0.254594
MAP3K8	0.893751	0.435095
MAPK12	-0.302226	0.355016
MAPK13	0.206643	-0.100051
MAPK3	-1.13606	0.334568
MAPK8	0.718964	-0.675765
MAPKAPK3	0.938098	-0.452057
MAPRE1	-0.312939	-0.637109
MARS	0.659011	0.813935
MAS1	5.59174	0.910733
MATN3	-1.00289	0.314986
MAX	1.76596	3.00612
MCC	1.17377	0.0867838
MCCC1	1.03069	0.21661
MCM2	-2.4344	-2.14561
MCM4	-2.23107	-2.13289
MCM6	-2.81604	-2.32193
MDM2	0.340531	0.69309
MDM4	1.81803	1.61542
MELK	-2.87832	-0.954557
MET	-1.54793	-0.552156
MIB1	0.52306	0.641546
MKI67	-1.71786	-2.06492
MLF1IP	-1.56064	-1.63039
MLLT10	0.319618	0.861558
MLLT3	1.87145	0.452068
MME	0.737254	1.24062
MMP1	1.65031	0.688852
MMP11	-2.8997	3.88938
MMP14	-0.913216	0.393965
MMP17	0.259423	0.442545
MMP2	-2.05889	1.05728
MMP3	0.476122	0.479231
MMP9	0.0827026	1.07998
MRPL13	-0.0159576	-0.988504
MSH2	-1.0619	-1.69432
MSH6	-0.506353	-1.56918
MTDH	0.656268	-0.334607
MTOR	0.791606	-0.0499049
MX1	1.65581	2.33142
MYBL2	-2.67116	-3.699
MYC	1.29285	1.7054
MYD88	0.984042	-0.309359
MYRIP	1.88908	1.3471
NDC80	-1.9885	-1.88364
NDRG1	3.15931	2.33942
NF1	0.529071	0.351628
NF2	-3.25154	-0.72261
NFKB1	0.722466	-0.537424
NFKB2	1.63041	1.13093
NID1	-1.14242	-1.11716
NINJ1	0.0496308	1.33571
NME1	-0.846843	-0.954557
NME3	-1.36959	-0.436354
NMU	-1.24469	-0.940645
NOTCH1	-0.145605	-0.12658
NOTCH2	0.109695	-0.416962
NPM1	0.286881	-0.288065
NQO1	-0.128156	0.368489
NR1D1	1.80653	1.42492
NR2F6	-0.179515	0.077243
NR4A1	1.11036	-0.520769
NRAS	-0.26708	0.0676387
NRG1	0.491597	0.45628
ORC6L	-0.816037	-1.83136
OXCT1	-1.06492	-0.668868
PA2G4	-0.836501	-1.36216
PABPC1	0.317304	0.280956
PAK1	-1.67116	1.93357
PCNA	-2.24469	-2.54793
PDGFA	0.596458	0.233888
PDGFB	-0.077041	0.31034
PDPK1	-0.924125	0.713696
PEA15	0.455229	0.729444
PECI	-1.22095	-1.26188
PFDN4	0.759582	0.21661
PFDN5	-0.0513992	0.149259
PFKP	-0.41889	-0.637109
PGAM1	-1.47393	-1.33279
PGK1	-1.08291	-0.738386
PHB	-1.13289	-1.39973
PHB2	-0.086201	-0.710756
PIK3CA	0.806364	-0.0973455
PIK3CB	-0.249822	-0.713119
PIK3CD	0.981853	0.358396
PIR	0.733788	1.02006
PKM2	-0.8863	-0.00723157
PKMYT1	-1.85204	-1.61706
PLCG1	-0.011588	0.207893
PLCG2	5.91332	3.05242
PLK2	0.27739	1.62246
POLR2A	0.650765	-0.0892673
PPARG	0.54498	0.760434
PPIA	-1.5126	-0.966522
PPIH	-0.632629	-1.46993
PPP1R1B	1.01792	-0.621488
PPP2R5A	-0.209228	-0.128156
PRC1	-1.86775	-1.49411
PRDX2	-1.63487	0.0827026
PRDX4	0.395063	-0.318326
PRKACA	-0.997117	-1.26882
PRKAR1A	-0.046921	-0.194295
PRKAR2B	0.839153	-1.9105
PRKCA	-2.1976	-0.158154
PRKCD	-0.271046	0.00938829
PRKCE	-0.880976	1.59359
PRKCG	-2.46594	2.2552
PRKCZ	-0.0499049	0.851199
PRKD1	1.94298	0.424385
PRKD2	0.981853	-0.232769
PRKX	-0.00723157	-0.668868
PRNP	0.519039	0.124328
PSMA1	-0.158429	-0.657445
PTEN	0.0838344	-0.354151
PTGS1	0.674461	0.175045
PTMA	-1.84166	-0.691989
PTN	1.23143	-1.35845
RAB27B	1.52356	1.11636
RAB5A	1.74889	0.897628
RAB6B	-1.15521	1.19975
RAC1	-0.343141	-0.968616
RAC2	-1.31473	-1.26882
RAD21	-0.706041	-0.773491
RAD50	0.735522	0.629473
RAD51	-1.00289	-2.41889
RAF1	-0.336428	-0.535332
RALBP1	-0.00723157	0.233888
RAP1A	0.00288251	-0.492079
RARB	1.21412	-0.648372
RASGRF1	-0.382702	0.634129
RASL11B	0.602172	0.129613
RB1	0.0565835	-0.968605
RBBP4	0.00863031	0.244887
RBL2	-0.409278	0.00575927
REL	0.0860684	0.076193
RELA	1.81369	0.272161
RELB	1.59598	0.97673
RFC2	-1.20091	-2.17788
RFC4	-1.152	-2.13289
RGS19	-0.0619024	-0.139236
RHOA	-0.0679388	-0.456009
RHOB	1.93433	2.05658
RHOC	0.316146	-0.428566
RIPK1	1.58832	0.351628
ROCK1	0.681674	-0.0499049
ROCK2	0.339137	-0.382702
RPLP0	0.664483	0.212881
RPN2	0.517024	-0.155213
RPS6KB1	-0.0649175	-0.682696
RRM2	-3.62593	-3.87832
SARS	1.20289	1.23327
SEC14L2	-1.12973	-0.571322
SEMA4D	-0.15682	-0.498179
SERPINH1	0	0.45628
SFN	0.660837	0.798258
SFPQ	-1.36587	-1.16488
SFRS7	-0.554273	-0.778432
SHB	-0.450084	-0.862496
SIAH2	1.57725	-0.248108
SIVA1	0.0468403	-1.30401
SKI	-0.347399	-0.438307
SKIL	-0.148801	0.217851
SLC16A1	-0.356606	-0.0144996
SLC1A4	1.94711	3.5894
SLC20A1	-1.73697	-0.880976
SLC7A1	0.590722	0.869477
SMAD1	-0.0218044	0.207893
SMO	-1.72738	-0.668868
SNAI2	-0.979942	1.04544
SND1	0.286881	0.899176
SOCS1	3.67627	1.9241
SOCS3	0.611645	0.185232
SOD1	-0.186065	-0.477944
SORT1	-0.179515	-0.321928
SP1	0.648926	0.324235
SPINT2	0.707525	2.45418
SPP1	0.588805	2.37267
SPRY2	2.89685	-1.59946
SRC	-0.612637	1.30918
STAT1	0.671746	0.530071
STAT2	1.37295	2.82212
STAT3	0.144649	0.235292
STAT5B	-0.207561	0.380729
STK3	1.05242	0.415759
STK32B	-0.459973	1.8168
STMN1	-2.35107	-0.625934
STX1A	-0.227692	-0.137648
SYNCRIP	-0.1976	-0.968605
TBL3	-1.1976	-0.304006
TBP	0.469886	0.359521
TBX3	0.949348	0.0648829
TCF3	-0.744197	-0.823677
TCF4	-1.30757	-1.12343
TCF7L2	-0.452057	-0.0528949
TFDP1	-2.39593	-5.87832
TFDP2	-0.428566	0.652601
TFRC	-0.107803	-0.312939
TGFA	-0.724993	0.267835
TGFB1	-1.92139	0.0989585
TGFB2	-1.98279	1.54745
TGFB3	-2.81604	-0.258425
TGFBI	-0.732165	0.60027
TGFBR1	-0.093879	0.474047
TGFBR2	-1.16812	-0.442222
TGFBR3	0.656268	0.308011
THBS1	-3.22432	-1.62593
TIE1	0.798258	0.304511
TIMP1	-0.181149	-0.708396
TIMP3	-0.131313	-0.258425
TJP1	0.822118	0.252173
TK1	-2.1078	-2.71786
TLE1	0.585924	-0.0985055
TLR3	0.491597	-0.210897
TLR4	-0.803393	0.895303
TLR9	1.41792	3.81383
TMEFF1	0.746743	0.231432
TMEM45A	3.24975	0.649845
TNFRSF10A	1.33457	-0.547932
TNFRSF10B	1.5064	0.474047
TNFRSF1A	-0.345569	0.502428
TNFRSF1B	-0.724993	-1.60384
TNK2	-0.415037	-0.0499049
TOB1	1.04614	0.536053
TP53BP2	0.757023	0.155749
TP53I3	-0.246395	-0.0306192
TPBG	0.586885	0.757877
TPT1	1.45207	0.43189
TRADD	1.73855	0.219091
TRAM1	1.64708	1.09085
TRIP13	-1.77103	-2.23786
TRRAP	0.471968	-0.490051
TSG101	1.20633	0.329173
TUBA4A	-1.68038	0.178874
TUBB2A	0.545968	-1.11404
TXNRD1	0.396159	0.898402
TYK2	0.352759	-0.428566
TYRO3	-0.231075	-0.96016
UBC	1.86076	1.36121
UBE2L6	1.05242	0.531069
UCHL1	1.20226	0.454176
UCHL5	-0.0380063	-1.33643
UHMK1	-0.436354	-0.436354
USP7	-0.137648	-0.588574
VDAC1	-0.694321	-0.21424
VEGFA	1.5955	1.82416
VIM	-0.013043	0.109695
WNT5A	-1.13289	1.19219
WT1	-0.145605	-0.968605
XRCC1	-0.260152	-0.469929
XRCC3	-1.98279	-1.67577
XRCC4	0.0881416	-0.859876
XRCC5	-1.82113	-0.356606
XRCC6	-0.597278	-0.634867
YBX1	-0.0588937	-0.444184
YES1	0.045443	-0.467932
YWHAB	-1.31115	-0.00144342
YWHAZ	-0.413115	-0.498179
ZMYND8	0.222805	-0.148801
