# Supplementary material for: An Examination of the Anti-Cancer Properties of Plant Cannabinoids in Preclinical Models of Mesothelioma
Source: Cancers (Basel). 2022 Aug 5;14(15):3813. doi: 10.3390/cancers14153813 (PMC9367527; doi:10.3390/cancers14153813)
Supplement: Supplementary file 1 [file cancers-14-03813-s001.zip › Table S4 Open Array shared genes FC.xlsx]

## Sheet: CBD
Shared genes (>2-fold change [FC]) as a result of CBD treatment
42 >2FC up regulated and 59 >2FC down regulated
		Log2 FC
	Gene target	H2542	MSTO
	AARS	2.57701	2.08746
	ACTB	-3.15843	-1.18771
	ALDH6A1	2.18365	1.29866
	ASNS	2.70044	2.48826
	ASPM	-2.53116	-2.18442
	ATAD2	-2.62593	-2.25154
	AURKA	-2.45799	-3.1976
	BARD1	-3.68038	-1.5951
	BBC3	4.10484	1.7264
	BHLHE40	2.94879	2.02963
	BUB1	-2.42663	-2.16488
	CAMK2B	1.95903	3.93612
	CBLB	2.2228	1.65581
	CCNA2	-3.4112	-2.00578
	CCNB1	-3.55639	-2.41889
	CCNB2	-2.60823	-2.39593
	CCND1	-1.35476	-1.09542
	CD24	2.51475	4.18761
	CD59	-2.16488	-2.25843
	CDC20	-1.61264	-2.34373
	CDC25A	-1.662	-2.62593
	CDC25B	-2.60823	-1.32554
	CDK1	-3.30757	-1.56064
	CDK18	2.18872	2.00504
	CDK2	-3.47393	-1.36959
	CEBPG	2.97435	8.08207
	CHAF1A	-1.36216	-1.02034
	CIRBP	2.69711	1.24367
	COL1A1	-3.02327	-2.55639
	COL4A2	-1.486	-1.70369
	CTSC	-2.11404	-1.62593
	DCK	-1.07704	-1.23107
	DEPDC1	-2.32916	-1.32554
	DTL	-1.54793	-1.46196
	EGR1	2.83471	1.45207
	FASTK	1.9782	1.44784
	FBN1	-3.77596	-1.5187
	FUT8	-1.00578	-1.5951
	FYN	1.42653	1.06074
	GDF15	6.85363	4.24092
	GGH	-2.34373	-1.92139
	GRB7	1.99095	3.94551
	H2AFZ	-2.68038	-1.45403
	HMMR	-2.87832	-2.17137
	HSPA5	3.58724	2.14209
	HYOU1	2.50437	1.0072
	ID1	-4.50635	-1.92139
	ID2	-2.23786	-1.23107
	IDUA	1.01721	3.43483
	IGFBP4	-1.11092	-1.65745
	INSR	1.44255	1.57628
	KIF14	-1.70369	-1.45403
	KPNA2	-2.191	-1.8997
	KRT18	-2.33643	-1.46196
	LCN2	5.66235	2.06626
	LONP1	1.36233	1.30509
	MCM2	-2.44222	-1.36216
	MCM4	-2.87832	-2.26534
	MCM6	-2.16488	-1.70369
	MDM4	2.17632	1.79494
	MKI67	-3.55639	-2.79586
	MLF1IP	-1.0862	-1.53116
	MME	2.23909	1.36513
	MMP1	4.87848	1.05658
	MMP9	1.64062	2.23297
	MYBL2	-3.36587	-2.55639
	MYC	2.14078	2.07108
	MYRIP	3.29602	1.02219
	NDRG1	3.21661	2.6597
	NF2	-1.60823	-1.50635
	NMU	-3.07097	-2.88897
	NR1D1	3.66357	1.36289
	PCNA	-3.05889	-1.77596
	PECI	-1.7084	-1.31833
	PGAM1	-1.98279	-1.35107
	PKMYT1	-1.5649	-1.75147
	PLCG2	4.73915	2.36709
	PRC1	-3.18442	-2.17137
	PRKACA	-1.30757	-1.08009
	PTPRN	1.01078	3.42465
	RAB27B	2.20602	1.00935
	RFC2	-1.074	-1.26188
	RHOB	2.04649	1.00504
	RRM2	-4.8365	-1.85204
	SLC1A4	1.58015	3.28821
	STAT2	1.3774	2.15834
	TGFBI	-2.50635	-1.98279
	THBS1	-3.14561	-2.22432
	TK1	-2.60823	-2.08314
	TPT1	1.41359	1.45733
	TRAM1	1.35502	1.36289
	TRIP13	-1.85204	-1.54372
	UBC	2.54251	1.84318
	VEGFA	2.72683	1.75702

## Sheet: CBG
Shared genes (>2-fold change [FC]) as a result of CBG treatment
49 >2FC up regulated and 67 >2FC down regulated
		Log2 FC
	Gene target	H2452	MSTO
	ACTB	-2.23786	-1.85726
	ALDH6A1	1.86908	1.53506
	ANPEP	-1.09851	-1.13289
	ASNS	3.1235	2.98076
	ASPM	-1.38458	-2.05289
	ATAD2	-2.86775	-2.40354
	ATF4	1.63691	1.2969
	AURKA	-1.2863	-1.64386
	BARD1	-2.77596	-2.04097
	BBC3	3.68381	1.98149
	BHLHE40	1.33857	1.81435
	BIRC5	-2.25643	-1.84903
	BRCA1	-1.25154	-1.41504
	BTG2	1.42868	1.04124
	BUB1	-1.05289	-1.76121
	CAMK2B	2.29219	2.38322
	CBLB	1.8844	2.90053
	CCNA2	-3.32193	-2.16488
	CCNB1	-2.07097	-2.36587
	CCNB2	-1.43051	-1.9885
	CCND1	-2.76611	-1.5187
	CCND3	-1.11092	-1.62593
	CCNE1	-1.64386	-1.75147
	CD24	1.95866	1.07108
	CD59	-1.00289	-2.2723
	CDC25A	-2.38836	-1.92139
	CDK1	-2.39593	-2.2109
	CDK18	1.95382	1.86156
	CDK2	-2.96578	-2.20423
	CDKN1A	3.74631	1.25761
	CDKN1C	3.05259	1.68392
	CEBPG	2.73227	1.43189
	CHAF1A	-1.36587	-2.01742
	CIRBP	2.00612	1.2345
	CKS2	-1.12029	-1.96016
	CTPS	-1.12658	-1.14242
	CTSC	-1.662	-1.31115
	DCK	-1.02621	-1.75633
	DCN	4.24291	2.67852
	DEPDC1	-1.68501	-1.8997
	DHRS2	2.52306	1.15251
	DTL	-2.4112	-2.699
	E2F1	-1.77103	-2.51457
	EPHA2	-1.23447	-2.07704
	ERBB4	1.88869	1.19093
	ESM1	-2.12658	-2.61706
	EZH2	-1.04394	-1.662
	FLT1	2.8486	1.05102
	FOS	1.12499	1.78199
	FTL	1.71853	1.25459
	FYN	1.04824	1.89879
	GDF15	5.6372	3.50665
	GGH	-1.36216	-1.79586
	GPR39	-1.486	-1.11404
	H2AFZ	-1.76611	-2.07704
	HSPA5	2.22527	2.95736
	HYOU1	2.06661	1.58688
	ICAM1	1.60217	2.60265
	ID1	-2.58208	-1.33279
	IDUA	2.19409	3.62012
	INSR	1.05658	1.1564
	ITGB4	1.44467	2.9501
	ITPR1	1.55287	1.66993
	JUNB	1.63923	1.36569
	KIF14	-1.11404	-1.52699
	KPNA2	-2.36587	-1.93788
	KRT18	-1.51457	-1.45008
	LCN2	3.59383	5.27128
	LDHA	-1.18442	-1.662
	MAD2L1	-1.59946	-2.00578
	MAX	1.76596	3.00612
	MCM2	-2.4344	-2.14561
	MCM4	-2.23107	-2.13289
	MCM6	-2.81604	-2.32193
	MDM4	1.81803	1.61542
	MKI67	-1.71786	-2.06492
	MLF1IP	-1.56064	-1.63039
	MSH2	-1.0619	-1.69432
	MX1	1.65581	2.33142
	MYBL2	-2.67116	-3.699
	MYC	1.29285	1.7054
	MYRIP	1.88908	1.3471
	NDC80	-1.9885	-1.88364
	NDRG1	3.15931	2.33942
	NFKB2	1.63041	1.13093
	NID1	-1.14242	-1.11716
	NR1D1	1.80653	1.42492
	PCNA	-2.24469	-2.54793
	PECI	-1.22095	-1.26188
	PGAM1	-1.47393	-1.33279
	PHB	-1.13289	-1.39973
	PKMYT1	-1.85204	-1.61706
	PLCG2	5.91332	3.05242
	PRC1	-1.86775	-1.49411
	RAB27B	1.52356	1.11636
	RAC2	-1.31473	-1.26882
	RAD51	-1.00289	-2.41889
	RFC2	-1.20091	-2.17788
	RFC4	-1.152	-2.13289
	RHOB	1.93433	2.05658
	RRM2	-3.62593	-3.87832
	SARS	1.20289	1.23327
	SFPQ	-1.36587	-1.16488
	SLC1A4	1.94711	3.5894
	SOCS1	3.67627	1.9241
	STAT2	1.37295	2.82212
	TCF4	-1.30757	-1.12343
	TFDP1	-2.39593	-5.87832
	THBS1	-3.22432	-1.62593
	TK1	-2.1078	-2.71786
	TLR9	1.41792	3.81383
	TRAM1	1.64708	1.09085
	TRIP13	-1.77103	-2.23786
	UBC	1.86076	1.36121
	VEGFA	1.5955	1.82416
	XRCC3	-1.98279	-1.67577
