# Supplementary material for: An Examination of the Anti-Cancer Properties of Plant Cannabinoids in Preclinical Models of Mesothelioma
Source: Cancers (Basel). 2022 Aug 5;14(15):3813. doi: 10.3390/cancers14153813 (PMC9367527; doi:10.3390/cancers14153813)
Supplement: Supplementary file 1 [file cancers-14-03813-s001.zip › Table S5 CBD comparison IPA data.xls]

## Sheet: Z score CGD
© 2000-2022 QIAGEN. All rights reserved.	Z-score for CBD treatment
Canonical Pathways	H2452	MSTO
Senescence Pathway	2.887	2.714
Cyclins and Cell Cycle Regulation	-1.941	-2.887
Mitotic Roles of Polo-Like Kinase	-2.121	-2.449
Autophagy	1.091	-2.828
Xenobiotic Metabolism AHR Signaling Pathway	1.89	2
Estrogen-mediated S-phase Entry	-1.667	-2.121
Kinetochore Metaphase Signaling Pathway	-2.121	-1.633
Insulin Secretion Signaling Pathway	1.807	1.897
Thrombin Signaling	2	1.667
Cell Cycle: G1/S Checkpoint Regulation	1.265	2.333
Gαq Signaling	2.53	1
Estrogen Receptor Signaling	1.826	1.698
Adrenomedullin signaling pathway	2.357	-1.134
NF-κB Signaling	2.357	1.134
Production of Nitric Oxide and Reactive Oxygen Species in Macrophages	2.138	1.134
HIF1α Signaling	0.577	2.673
Cell Cycle: G2/M DNA Damage Checkpoint Regulation	1.508	1.667
Natural Killer Cell Signaling	1.897	1.265
Phospholipase C Signaling	1.941	1.134
Cell Cycle Control of Chromosomal Replication	-0.905	-2.121
Unfolded protein response	2	1
TEC Kinase Signaling	2.324	0.632
Apoptosis Signaling	-1.265	-1.633
Inhibition of Matrix Metalloproteases	-0.816	-2
Oxytocin Signaling Pathway	2	-0.816
EIF2 Signaling	-1.414	-1.342
AMPK Signaling	1.414	1.342
ATM Signaling	1.732	1
Role of Pattern Recognition Receptors in Recognition of Bacteria and Viruses	2.714	0
Endothelin-1 Signaling	1.941	0.707
CLEAR Signaling Pathway	1.213	-1.414
Role of NFAT in Regulation of the Immune Response	1.508	1
Breast Cancer Regulation by Stathmin1	0.87	1.606
TGF-β Signaling	-1.134	-1.342
Erythropoietin Signaling Pathway	1.291	-1.134
Pancreatic Adenocarcinoma Signaling	1.155	1.265
Cardiac Hypertrophy Signaling (Enhanced)	1.732	0.632
CREB Signaling in Neurons	0.853	1.508
BER (Base Excision Repair) Pathway	-1.342	-1
Apelin Cardiomyocyte Signaling Pathway	1.89	0.447
Regulation Of The Epithelial Mesenchymal Transition In Development Pathway	2.333	N/A
CXCR4 Signaling	1.508	0.816
P2Y Purigenic Receptor Signaling Pathway	1.807	0.447
IL-23 Signaling Pathway	2.236	N/A
Neuregulin Signaling	-0.302	1.897
Tumor Microenvironment Pathway	-0.18	2
Protein Kinase A Signaling	1.528	0.632
Agrin Interactions at Neuromuscular Junction	-1.342	-0.816
Phagosome Formation	1	1.155
mTOR Signaling	1.134	1
PEDF Signaling	1.134	-1
NRF2-mediated Oxidative Stress Response	1	1.134
Synaptic Long Term Depression	1.134	1
NGF Signaling	1.667	-0.447
Induction of Apoptosis by HIV1	1.633	0.447
Dendritic Cell Maturation	1.604	-0.447
Osteoarthritis Pathway	0.894	1.134
Apelin Adipocyte Signaling Pathway	-1	1
NER (Nucleotide Excision Repair, Enhanced Pathway)	-2	N/A
PAK Signaling	-1	-1
Role of RIG1-like Receptors in Antiviral Innate Immunity	2	N/A
Chemokine Signaling	-1	1
CSDE1 Signaling Pathway	-1	-1
B Cell Activating Factor Signaling	2	N/A
TWEAK Signaling	2	N/A
PI3K/AKT Signaling	0	-2
IL-9 Signaling	2	N/A
Toll-like Receptor Signaling	2	N/A
Inhibition of ARE-Mediated mRNA Degradation Pathway	-1	1
Cell Cycle Regulation by BTG Family Proteins	1	-1
STAT3 Pathway	-0.577	1.414
Acute Myeloid Leukemia Signaling	0.632	-1.342
Role of PKR in Interferon Induction and Antiviral Response	1.155	-0.816
Prolactin Signaling	1.155	0.816
Acute Phase Response Signaling	0.535	1.414
Relaxin Signaling	1.941	N/A
IL-17 Signaling	0.5	1.414
Role of Hypercytokinemia/hyperchemokinemia in the Pathogenesis of Influenza	1.89	N/A
Death Receptor Signaling	1.414	-0.447
Salvage Pathways of Pyrimidine Ribonucleotides	-1.134	0.707
Regulation of IL-2 Expression in Activated and Anergic T Lymphocytes	1.387	0.447
Coronavirus Pathogenesis Pathway	0.688	1.134
Paxillin Signaling	-1	-0.816
PI3K Signaling in B Lymphocytes	1.807	N/A
Glioma Signaling	0.632	1.134
Mouse Embryonic Stem Cell Pluripotency	-0.632	-1.134
HGF Signaling	-0.832	-0.905
Corticotropin Releasing Hormone Signaling	0.905	0.816
B Cell Receptor Signaling	1.387	0.333
Cholecystokinin/Gastrin-mediated Signaling	1.265	-0.447
MSP-RON Signaling In Cancer Cells Pathway	1	-0.707
RAC Signaling	0.707	-1
Endocannabinoid Developing Neuron Pathway	-0.707	-1
BMP signaling pathway	0.707	-1
Insulin Receptor Signaling	0.333	1.342
fMLP Signaling in Neutrophils	1.667	N/A
Xenobiotic Metabolism General Signaling Pathway	0	1.667
TREM1 Signaling	1.667	N/A
WNT/Ca+ pathway	1.667	N/A
Neuroinflammation Signaling Pathway	1.279	-0.378
IL-7 Signaling Pathway	-1.265	-0.378
GPCR-Mediated Nutrient Sensing in Enteroendocrine Cells	1.633	0
Sperm Motility	1.633	0
Crosstalk between Dendritic Cells and Natural Killer Cells	1.633	N/A
GADD45 Signaling	-0.728	0.905
Aldosterone Signaling in Epithelial Cells	1.633	N/A
Activation of IRF by Cytosolic Pattern Recognition Receptors	1.633	N/A
Actin Cytoskeleton Signaling	-0.816	-0.816
PTEN Signaling	-0.258	1.342
Regulation Of The Epithelial Mesenchymal Transition By Growth Factors Pathway	0.426	1.155
FAK Signaling	-1.095	0.471
PKCθ Signaling in T Lymphocytes	1.155	0.378
Glioma Invasiveness Signaling	-0.707	0.816
Androgen Signaling	1.508	0
Regulation of Cellular Mechanics by Calpain Protease	-0.632	0.816
Endocannabinoid Neuronal Synapse Pathway	0.447	1
CCR3 Signaling in Eosinophils	0.447	1
Thrombopoietin Signaling	1	0.447
Dopamine-DARPP32 Feedback in cAMP Signaling	1.414	0
Pyroptosis Signaling Pathway	1.414	N/A
eNOS Signaling	1.414	0
NAD Signaling Pathway	-1.414	N/A
Gα12/13 Signaling	1.414	N/A
Nitric Oxide Signaling in the Cardiovascular System	1.414	0
Factors Promoting Cardiogenesis in Vertebrates	0.775	-0.632
Apelin Endothelial Signaling Pathway	1.387	N/A
GP6 Signaling Pathway	1	-0.378
Neurotrophin/TRK Signaling	-0.378	-1
Semaphorin Neuronal Repulsive Signaling Pathway	1	0.378
Colorectal Cancer Metastasis Signaling	1.095	0.258
Synaptic Long Term Potentiation	0.905	0.447
Neuropathic Pain Signaling In Dorsal Horn Neurons	0.905	0.447
Sphingosine-1-phosphate Signaling	1.342	N/A
TNFR2 Signaling	1.342	N/A
Role of PI3K/AKT Signaling in the Pathogenesis of Influenza	1.342	N/A
PCP (Planar Cell Polarity) Pathway	1.342	N/A
IL-17A Signaling in Airway Cells	1.342	N/A
Xenobiotic Metabolism CAR Signaling Pathway	0	1.342
April Mediated Signaling	1.342	N/A
4-1BB Signaling in T Lymphocytes	1.342	N/A
VDR/RXR Activation	-1.342	N/A
iNOS Signaling	1.342	N/A
Antioxidant Action of Vitamin C	-1.342	N/A
IL-2 Signaling	-1.342	N/A
Epithelial Adherens Junction Signaling	1	-0.333
IL-8 Signaling	1	0.302
Renin-Angiotensin Signaling	1.291	0
PPARα/RXRα Activation	-0.832	0.447
Endocannabinoid Cancer Inhibition Pathway	0.277	1
Non-Small Cell Lung Cancer Signaling	-0.816	-0.447
G-Protein Coupled Receptor Signaling	1.225	0
Opioid Signaling Pathway	1.213	0
ERBB Signaling	-0.302	0.905
NF-κB Activation by Viruses	1.155	N/A
VEGF Family Ligand-Receptor Interactions	0.707	0.447
Melatonin Signaling	0.707	-0.447
White Adipose Tissue Browning Pathway	1.134	0
Role of IL-17F in Allergic Inflammatory Airway Diseases	1.134	N/A
Angiopoietin Signaling	1.134	N/A
IL-1 Signaling	1.134	N/A
Fc Epsilon RI Signaling	1.134	0
Dilated Cardiomyopathy Signaling Pathway	1.134	0
TNFR1 Signaling	1.134	0
Role of MAPK Signaling in Inhibiting the Pathogenesis of Influenza	1.134	N/A
CD40 Signaling	1.134	N/A
RANK Signaling in Osteoclasts	1.134	N/A
Necroptosis Signaling Pathway	0.302	0.816
Synaptogenesis Signaling Pathway	0.471	0.632
T Cell Receptor Signaling	0.277	-0.816
Systemic Lupus Erythematosus In B Cell Signaling Pathway	1.091	0
Leukocyte Extravasation Signaling	0.832	-0.258
Type II Diabetes Mellitus Signaling	0.632	0.447
Aryl Hydrocarbon Receptor Signaling	0.471	-0.577
Sumoylation Pathway	0.632	0.378
Xenobiotic Metabolism PXR Signaling Pathway	0.302	0.707
BEX2 Signaling Pathway	-0.302	-0.707
Th2 Pathway	1	N/A
Ephrin B Signaling	-1	0
MIF-mediated Glucocorticoid Regulation	1	N/A
Ferroptosis Signaling Pathway	-1	N/A
Gαi Signaling	-1	N/A
p38 MAPK Signaling	1	0
GDNF Family Ligand-Receptor Interactions	0	-1
Inflammasome pathway	1	N/A
Bladder Cancer Signaling	-1	N/A
Amyotrophic Lateral Sclerosis Signaling	1	N/A
FAT10 Cancer Signaling Pathway	1	N/A
CD27 Signaling in Lymphocytes	1	N/A
IL-6 Signaling	0.535	-0.447
Pulmonary Healing Signaling Pathway	0.73	0.218
HER-2 Signaling in Breast Cancer	0.408	0.535
ERK/MAPK Signaling	0.577	0.333
Estrogen-Dependent Breast Cancer Signaling	0.905	N/A
Signaling by Rho Family GTPases	0.905	0
Role of NFAT in Cardiac Hypertrophy	0.535	-0.333
Integrin Signaling	0	0.832
IL-15 Production	0.832	N/A
Reelin Signaling in Neurons	0.378	0.447
Macropinocytosis Signaling	0.378	0.447
Fcγ Receptor-mediated Phagocytosis in Macrophages and Monocytes	0.447	-0.378
GNRH Signaling	-0.243	0.577
MIF Regulation of Innate Immunity	0.816	N/A
p70S6K Signaling	0.816	0
Renal Cell Carcinoma Signaling	-0.816	N/A
α-Adrenergic Signaling	0.816	N/A
Antiproliferative Role of Somatostatin Receptor 2	-0.816	N/A
Ovarian Cancer Signaling	0	0.816
UVB-Induced MAPK Signaling	0.816	0
Role of MAPK Signaling in Promoting the Pathogenesis of Influenza	0.816	N/A
Melanoma Signaling	-0.816	N/A
GM-CSF Signaling	-0.816	N/A
Pyridoxal 5'-phosphate Salvage Pathway	-0.816	0
Huntington's Disease Signaling	0	0.816
PFKFB4 Signaling Pathway	-0.816	N/A
Apelin Pancreas Signaling Pathway	-0.816	N/A
ERBB4 Signaling	0.816	0
Sirtuin Signaling Pathway	-0.775	0
ILK Signaling	0.775	0
Wound Healing Signaling Pathway	-0.229	0.535
Thyroid Cancer Signaling	-0.302	-0.447
MYC Mediated Apoptosis Signaling	0.333	0.378
PDGF Signaling	0.707	0
CDK5 Signaling	-0.707	0
ERB2-ERBB3 Signaling	-0.707	0
Role of CHK Proteins in Cell Cycle Checkpoint Control	0.707	N/A
LXR/RXR Activation	-0.707	N/A
G Beta Gamma Signaling	0.707	0
LPS-stimulated MAPK Signaling	0.632	0
HOTAIR Regulatory Pathway	0	0.577
Cardiac Hypertrophy Signaling	0.577	0
WNT/β-catenin Signaling	0.577	0
Regulation of Actin-based Motility by Rho	N/A	-0.447
SNARE Signaling Pathway	0.447	N/A
Endometrial Cancer Signaling	-0.447	N/A
HMGB1 Signaling	0	-0.447
FLT3 Signaling in Hematopoietic Progenitor Cells	0.447	N/A
VEGF Signaling	0	0.447
PD-1, PD-L1 cancer immunotherapy pathway	0.447	N/A
Hypoxia Signaling in the Cardiovascular System	0.447	N/A
Telomerase Signaling	-0.447	N/A
Regulation of eIF4 and p70S6K Signaling	-0.447	N/A
LPS/IL-1 Mediated Inhibition of RXR Function	0.447	N/A
Gαs Signaling	0.447	N/A
ID1 Signaling Pathway	0.192	-0.229
Hepatic Fibrosis Signaling Pathway	-0.164	-0.218
Polyamine Regulation in Colon Cancer	-0.378	N/A
Inhibition of Angiogenesis by TSP1	0.378	0
Calcium Signaling	0.378	N/A
Ephrin Receptor Signaling	-0.378	0
p53 Signaling	0	-0.378
RHOGDI Signaling	N/A	-0.378
IL-13 Signaling Pathway	-0.378	N/A
Small Cell Lung Cancer Signaling	0.378	N/A
UVC-Induced MAPK Signaling	0.378	0
Melanocyte Development and Pigmentation Signaling	0.378	N/A
14-3-3-mediated Signaling	0	0.378
cAMP-mediated signaling	-0.378	N/A
EGF Signaling	-0.378	0
BAG2 Signaling Pathway	-0.333	N/A
IGF-1 Signaling	-0.333	N/A
PPAR Signaling	-0.302	N/A
JAK/STAT Signaling	0.302	N/A
Oxytocin In Brain Signaling Pathway	-0.302	N/A
Glioblastoma Multiforme Signaling	0.229	0
Pulmonary Fibrosis Idiopathic Signaling Pathway	0	0.218
Adipogenesis pathway	N/A	N/A
Endoplasmic Reticulum Stress Pathway	N/A	N/A
UVA-Induced MAPK Signaling	0	N/A
Rapoport-Luebering Glycolytic Shunt	N/A	N/A
Role of JAK1 and JAK3 in γc Cytokine Signaling	N/A	N/A
β-alanine Degradation I	N/A	N/A
HIPPO signaling	N/A	N/A
Amyloid Processing	N/A	N/A
PXR/RXR Activation	0	N/A
Role of MAPK Signaling in the Pathogenesis of Influenza	N/A	N/A
tRNA Charging	N/A	N/A
CNTF Signaling	N/A	N/A
Basal Cell Carcinoma Signaling	0	N/A
DNA damage-induced 14-3-3σ Signaling	N/A	N/A
Granulocyte Adhesion and Diapedesis	N/A	N/A
Molecular Mechanisms of Cancer	N/A	N/A
Semaphorin Signaling in Neurons	N/A	N/A
G Protein Signaling Mediated by Tubby	N/A	N/A
Agranulocyte Adhesion and Diapedesis	N/A	N/A
Glutamate Removal from Folates	N/A	N/A
Pyrimidine Ribonucleotides De Novo Biosynthesis	N/A	N/A
Circadian Rhythm Signaling	N/A	N/A
MSP-RON Signaling In Macrophages Pathway	0	N/A
Role of NANOG in Mammalian Embryonic Stem Cell Pluripotency	N/A	N/A
Hepatic Fibrosis / Hepatic Stellate Cell Activation	N/A	N/A
Role of Tissue Factor in Cancer	N/A	N/A
Differential Regulation of Cytokine Production in Intestinal Epithelial Cells by IL-17A and IL-17F	N/A	N/A
Cancer Drug Resistance By Drug Efflux	N/A	N/A
Mechanisms of Viral Exit from Host Cells	N/A	N/A
Role of Osteoblasts, Osteoclasts and Chondrocytes in Rheumatoid Arthritis	N/A	N/A
Glycolysis I	N/A	N/A
ERK5 Signaling	0	N/A
Role of WNT/GSK-3β Signaling in the Pathogenesis of Influenza	N/A	N/A
Ceramide Signaling	0	N/A
DNA Double-Strand Break Repair by Homologous Recombination	N/A	N/A
Apelin Liver Signaling Pathway	N/A	N/A
Lymphotoxin β Receptor Signaling	N/A	N/A
Altered T Cell and B Cell Signaling in Rheumatoid Arthritis	N/A	N/A
Germ Cell-Sertoli Cell Junction Signaling	N/A	N/A
Human Embryonic Stem Cell Pluripotency	N/A	N/A
Sertoli Cell-Sertoli Cell Junction Signaling	N/A	N/A
Virus Entry via Endocytic Pathways	N/A	N/A
RAR Activation	N/A	N/A
Role of p14/p19ARF in Tumor Suppression	N/A	N/A
Vitamin-C Transport	N/A	N/A
Phagosome Maturation	N/A	N/A
Remodeling of Epithelial Adherens Junctions	N/A	N/A
Pyrimidine Ribonucleotides Interconversion	N/A	N/A
Asparagine Biosynthesis I	N/A	N/A
Role of JAK family kinases in IL-6-type Cytokine Signaling	N/A	N/A
GPCR-Mediated Integration of Enteroendocrine Signaling Exemplified by an L Cell	0	N/A
Airway Inflammation in Asthma	N/A	N/A
Mismatch Repair in Eukaryotes	N/A	N/A
Dermatan Sulfate Degradation (Metazoa)	N/A	N/A
Role of IL-17A in Arthritis	N/A	N/A
Telomere Extension by Telomerase	N/A	N/A
DNA Double-Strand Break Repair by Non-Homologous End Joining	N/A	N/A
FXR/RXR Activation	N/A	N/A
Role of JAK1, JAK2 and TYK2 in Interferon Signaling	N/A	N/A
Role of Macrophages, Fibroblasts and Endothelial Cells in Rheumatoid Arthritis	N/A	N/A
Fatty Acid β-oxidation III (Unsaturated, Odd Number)	N/A	N/A
Chronic Myeloid Leukemia Signaling	N/A	N/A
Glutathione-mediated Detoxification	N/A	N/A
T Cell Exhaustion Signaling Pathway	0	N/A
Glucocorticoid Receptor Signaling	N/A	N/A
Th1 and Th2 Activation Pathway	N/A	N/A
Guanine and Guanosine Salvage I	N/A	N/A
Parkinson's Signaling	N/A	N/A
IL-10 Signaling	N/A	N/A
Neuroprotective Role of THOP1 in Alzheimer's Disease	0	N/A
Tight Junction Signaling	N/A	N/A
Cellular Effects of Sildenafil (Viagra)	N/A	N/A
IL-3 Signaling	0	0
IL-22 Signaling	N/A	N/A
Hepatic Cholestasis	N/A	N/A
IL-17A Signaling in Gastric Cells	0	N/A
SPINK1 Pancreatic Cancer Pathway	N/A	N/A
MSP-RON Signaling Pathway	N/A	N/A
Axonal Guidance Signaling	N/A	N/A
Docosahexaenoic Acid (DHA) Signaling	N/A	N/A
Netrin Signaling	N/A	N/A
Pyrimidine Deoxyribonucleotides De Novo Biosynthesis I	N/A	N/A
Hereditary Breast Cancer Signaling	N/A	N/A
Retinoic acid Mediated Apoptosis Signaling	N/A	N/A
Regulation of the Epithelial-Mesenchymal Transition Pathway	N/A	N/A
Actin Nucleation by ARP-WASP Complex	N/A	N/A
Leptin Signaling in Obesity	N/A	N/A
Oncostatin M Signaling	0	N/A
nNOS Signaling in Neurons	N/A	N/A
SPINK1 General Cancer Pathway	N/A	N/A
Role of BRCA1 in DNA Damage Response	0	0
Sonic Hedgehog Signaling	0	N/A
Growth Hormone Signaling	0	N/A
Atherosclerosis Signaling	N/A	N/A
FGF Signaling	0	0
Superpathway of Inositol Phosphate Compounds	0	0
Ephrin A Signaling	N/A	N/A
Xenobiotic Metabolism Signaling	N/A	N/A
IL-17A Signaling in Fibroblasts	N/A	N/A
Clathrin-mediated Endocytosis Signaling	N/A	N/A
IL-12 Signaling and Production in Macrophages	N/A	N/A
FcγRIIB Signaling in B Lymphocytes	N/A	N/A
Airway Pathology in Chronic Obstructive Pulmonary Disease	N/A	N/A
Apelin Cardiac Fibroblast Signaling Pathway	N/A	N/A
Caveolar-mediated Endocytosis Signaling	N/A	N/A
Prostate Cancer Signaling	N/A	N/A
Gap Junction Signaling	N/A	N/A
Differential Regulation of Cytokine Production in Macrophages and T Helper Cells by IL-17A and IL-17F	N/A	N/A
Interferon Signaling	0	N/A

## Sheet: B-H P-value CBD
© 2000-2022 QIAGEN. All rights reserved.	Benjamini-Hochberg corrected p-values for CBD treatment
Canonical Pathways	H2452	MSTO
Pulmonary Healing Signaling Pathway	23.1181	15.0499
Colorectal Cancer Metastasis Signaling	25.8165	11.6221
Tumor Microenvironment Pathway	26.7497	10.5289
Pulmonary Fibrosis Idiopathic Signaling Pathway	24.3141	12.0413
Hepatic Fibrosis Signaling Pathway	24.4454	11.0209
ID1 Signaling Pathway	19.4552	12.7492
GADD45 Signaling	17.6561	10.3966
HIF1α Signaling	19.0468	8.75873
Aryl Hydrocarbon Receptor Signaling	14.8974	11.2247
Role of Macrophages, Fibroblasts and Endothelial Cells in Rheumatoid Arthritis	19.9375	4.95651
HER-2 Signaling in Breast Cancer	14.8974	7.40572
Senescence Pathway	16.1083	6.13251
Estrogen Receptor Signaling	15.3454	6.68186
Regulation Of The Epithelial Mesenchymal Transition By Growth Factors Pathway	15.3542	6.46431
p53 Signaling	12.811	8.35288
Hepatic Fibrosis / Hepatic Stellate Cell Activation	14.2994	6.43673
Cyclins and Cell Cycle Regulation	10.2728	10.1294
Hereditary Breast Cancer Signaling	11.455	8.75873
Cell Cycle: G2/M DNA Damage Checkpoint Regulation	11.615	8.55202
HOTAIR Regulatory Pathway	12.6032	7.15946
Axonal Guidance Signaling	12.9435	6.76938
Estrogen-mediated S-phase Entry	10.3899	9.31245
Breast Cancer Regulation by Stathmin1	12.7161	6.44835
Cell Cycle: G1/S Checkpoint Regulation	10.1714	8.65247
Osteoarthritis Pathway	14.5398	4.13991
Bladder Cancer Signaling	10.6837	7.57694
HGF Signaling	9.00327	9.09012
Glucocorticoid Receptor Signaling	12.9435	4.78887
Neuregulin Signaling	8.62632	8.65247
Regulation of the Epithelial-Mesenchymal Transition Pathway	13.2153	4.03057
GNRH Signaling	10.5012	6.46431
Cell Cycle Control of Chromosomal Replication	9.85093	6.87798
Mitotic Roles of Polo-Like Kinase	9.13566	7.52086
Wound Healing Signaling Pathway	9.54455	6.89825
ERBB Signaling	7.63326	8.53237
IL-8 Signaling	9.079	6.90785
Renin-Angiotensin Signaling	11.3833	4.58965
MSP-RON Signaling In Cancer Cells Pathway	11.5432	4.19808
Glioma Signaling	8.34092	7.33413
ILK Signaling	9.33768	6.30134
Role of CHK Proteins in Cell Cycle Checkpoint Control	11.0223	4.57355
ATM Signaling	9.42024	6.15311
Autophagy	12.4696	3.07327
RAR Activation	10.1263	5.37487
Regulation of Cellular Mechanics by Calpain Protease	7.87268	7.56784
IL-7 Signaling Pathway	9.49284	5.87608
Leukocyte Extravasation Signaling	6.24481	9.11195
Chronic Myeloid Leukemia Signaling	11.1317	4.06028
BEX2 Signaling Pathway	9.32931	5.76536
Protein Kinase A Signaling	11.2454	3.51391
Factors Promoting Cardiogenesis in Vertebrates	9.13566	5.61001
Thrombin Signaling	8.65068	5.81125
PTEN Signaling	11.1317	3.25247
Role of Osteoblasts, Osteoclasts and Chondrocytes in Rheumatoid Arthritis	11.1895	2.97121
DNA damage-induced 14-3-3σ Signaling	6.89253	7.17675
MYC Mediated Apoptosis Signaling	7.9062	6.02646
Cardiac Hypertrophy Signaling (Enhanced)	10.8603	3.02968
Opioid Signaling Pathway	9.63414	4.2447
Small Cell Lung Cancer Signaling	8.56461	5.23472
Adrenomedullin signaling pathway	11.133	2.63015
Coronavirus Pathogenesis Pathway	11.0257	2.58807
HMGB1 Signaling	10.4794	3.01154
Role of Tissue Factor in Cancer	8.65676	4.71079
Neuroinflammation Signaling Pathway	11.1067	2.16081
Prostate Cancer Signaling	10.786	2.35926
Role of BRCA1 in DNA Damage Response	8.30901	4.77111
P2Y Purigenic Receptor Signaling Pathway	10.9011	2.11336
WNT/β-catenin Signaling	7.61056	5.17406
Prolactin Signaling	9.079	3.66846
LPS-stimulated MAPK Signaling	8.05426	4.63683
IL-17A Signaling in Fibroblasts	10.2585	2.16989
Inhibition of Angiogenesis by TSP1	6.64932	5.75948
Endocannabinoid Cancer Inhibition Pathway	7.53229	4.87313
IL-17 Signaling	8.91378	3.42296
IL-6 Signaling	10.1344	2.16892
Sumoylation Pathway	6.2693	6.03313
STAT3 Pathway	7.94129	4.29791
NF-κB Activation by Viruses	10.6543	1.44123
Erythropoietin Signaling Pathway	9.20317	2.87529
Production of Nitric Oxide and Reactive Oxygen Species in Macrophages	7.94129	4.09233
Integrin Signaling	5.06039	6.87415
IL-12 Signaling and Production in Macrophages	9.77424	2.08301
IGF-1 Signaling	9.19341	2.5055
ERK/MAPK Signaling	6.48078	5.17406
Glioma Invasiveness Signaling	5.5139	6.07493
Acute Phase Response Signaling	8.09602	3.44754
Corticotropin Releasing Hormone Signaling	8.29314	3.24181
Circadian Rhythm Signaling	7.63032	3.73925
PI3K Signaling in B Lymphocytes	10.4791	0.883341
Thyroid Cancer Signaling	8.35906	2.96542
Macropinocytosis Signaling	6.37941	4.8955
FAT10 Cancer Signaling Pathway	9.11653	1.89483
14-3-3-mediated Signaling	7.29293	3.6521
Type II Diabetes Mellitus Signaling	8.22266	2.52474
Hepatic Cholestasis	7.94129	2.70911
Role of PKR in Interferon Induction and Antiviral Response	7.90853	2.72871
Role of Pattern Recognition Receptors in Recognition of Bacteria and Viruses	8.11654	2.48928
Synaptogenesis Signaling Pathway	7.34668	3.22772
CXCR4 Signaling	6.03908	4.46198
Acute Myeloid Leukemia Signaling	7.78089	2.71421
ERB2-ERBB3 Signaling	8.05987	2.42302
Apoptosis Signaling	7.20406	3.27583
Insulin Secretion Signaling Pathway	6.78938	3.68951
Sirtuin Signaling Pathway	8.60433	1.85374
Thrombopoietin Signaling	7.05481	3.35714
Relaxin Signaling	9.079	1.30345
Mouse Embryonic Stem Cell Pluripotency	6.24481	4.12622
p38 MAPK Signaling	5.71565	4.63683
Androgen Signaling	8.59871	1.74259
IL-15 Production	9.32937	1.00851
Tight Junction Signaling	9.17956	1.14081
Apelin Endothelial Signaling Pathway	8.64145	1.41936
JAK/STAT Signaling	9.27155	0.776235
Renal Cell Carcinoma Signaling	6.22422	3.82008
Non-Small Cell Lung Cancer Signaling	4.74606	5.29695
Role of NFAT in Cardiac Hypertrophy	6.34024	3.6521
Atherosclerosis Signaling	9.04201	0.948922
Kinetochore Metaphase Signaling Pathway	6.00412	3.96645
PPARα/RXRα Activation	7.83482	2.08301
Signaling by Rho Family GTPases	6.1554	3.73925
Neuropathic Pain Signaling In Dorsal Horn Neurons	7.32757	2.55541
Xenobiotic Metabolism Signaling	5.74995	4.12622
Sperm Motility	7.14875	2.65165
Melatonin Signaling	6.57379	3.12478
CLEAR Signaling Pathway	7.2641	2.40537
Germ Cell-Sertoli Cell Junction Signaling	5.99243	3.66258
Estrogen-Dependent Breast Cancer Signaling	9.32931	0.301515
Endothelin-1 Signaling	6.26145	3.35895
Gap Junction Signaling	6.90837	2.63182
Cholecystokinin/Gastrin-mediated Signaling	5.74131	3.79412
PI3K/AKT Signaling	6.89153	2.63015
RAC Signaling	6.04325	3.44031
Virus Entry via Endocytic Pathways	4.46145	5.00738
NRF2-mediated Oxidative Stress Response	4.63525	4.83315
Cardiac Hypertrophy Signaling	4.90915	4.52092
Caveolar-mediated Endocytosis Signaling	5.43083	3.96645
Natural Killer Cell Signaling	4.62578	4.70032
TNFR1 Signaling	6.57177	2.71421
Ephrin Receptor Signaling	4.55702	4.64178
G-Protein Coupled Receptor Signaling	5.73211	3.40074
G Beta Gamma Signaling	4.62438	4.43246
CREB Signaling in Neurons	6.79764	2.2378
Gαq Signaling	6.01425	2.97121
Salvage Pathways of Pyrimidine Ribonucleotides	3.79141	5.18148
Toll-like Receptor Signaling	7.34668	1.44123
MSP-RON Signaling In Macrophages Pathway	8.55481	0.199588
Regulation Of The Epithelial Mesenchymal Transition In Development Pathway	7.95345	0.740223
Epithelial Adherens Junction Signaling	4.00919	4.67615
PPAR Signaling	8.05987	0.622648
Huntington's Disease Signaling	6.57177	1.91131
fMLP Signaling in Neutrophils	6.24929	2.13704
Synaptic Long Term Potentiation	6.24929	2.13704
Chemokine Signaling	6.22422	2.14055
WNT/Ca+ pathway	8.00183	0.358832
Sertoli Cell-Sertoli Cell Junction Signaling	4.50349	3.85692
GP6 Signaling Pathway	4.66877	3.6521
Sonic Hedgehog Signaling	5.79788	2.46791
UVC-Induced MAPK Signaling	5.51304	2.73405
Death Receptor Signaling	5.59419	2.63182
TREM1 Signaling	7.39436	0.812714
Inhibition of Matrix Metalloproteases	5.06417	3.13029
FAK Signaling	5.60387	2.55541
Growth Hormone Signaling	6.621	1.53129
Induction of Apoptosis by HIV1	4.84016	3.29983
Ceramide Signaling	7.82859	0.275744
Pyridoxal 5'-phosphate Salvage Pathway	3.8569	4.23794
Xenobiotic Metabolism PXR Signaling Pathway	4.73644	3.35086
Oxytocin Signaling Pathway	6.60419	1.44796
Role of IL-17A in Arthritis	6.26954	1.75336
Necroptosis Signaling Pathway	5.53442	2.48022
Fc Epsilon RI Signaling	3.31724	4.67393
NGF Signaling	5.71565	2.2691
BMP signaling pathway	5.93078	2.04242
EGF Signaling	5.29519	2.63886
VEGF Family Ligand-Receptor Interactions	5.07419	2.84916
Agrin Interactions at Neuromuscular Junction	3.73203	4.11504
eNOS Signaling	4.6988	3.12478
BAG2 Signaling Pathway	7.05481	0.762001
Angiopoietin Signaling	6.33591	1.44796
VDR/RXR Activation	6.28989	1.44123
CD40 Signaling	6.83201	0.893968
TEC Kinase Signaling	3.96081	3.74821
4-1BB Signaling in T Lymphocytes	5.41004	2.28571
Endocannabinoid Developing Neuron Pathway	5.51175	2.17667
α-Adrenergic Signaling	5.1934	2.44801
Agranulocyte Adhesion and Diapedesis	5.04179	2.48022
IL-1 Signaling	5.59419	1.90604
Mismatch Repair in Eukaryotes	4.36603	3.12478
IL-3 Signaling	5.26746	2.15801
Semaphorin Signaling in Neurons	3.99857	3.379
Semaphorin Neuronal Repulsive Signaling Pathway	4.12292	3.24181
PEDF Signaling	5.07419	2.08301
Xenobiotic Metabolism General Signaling Pathway	2.17466	4.95185
Airway Pathology in Chronic Obstructive Pulmonary Disease	4.09489	3.02233
UVB-Induced MAPK Signaling	4.40191	2.71421
PDGF Signaling	5.0087	2.05202
Xenobiotic Metabolism AHR Signaling Pathway	4.97313	2.04242
Paxillin Signaling	2.04478	4.90453
Apelin Pancreas Signaling Pathway	5.79396	1.14049
Role of IL-17F in Allergic Inflammatory Airway Diseases	6.89288	0
Polyamine Regulation in Colon Cancer	5.14613	1.73843
Clathrin-mediated Endocytosis Signaling	4.04437	2.68829
Role of JAK1, JAK2 and TYK2 in Interferon Signaling	6.07801	0.653975
BER (Base Excision Repair) Pathway	3.73203	2.96542
CDK5 Signaling	5.015	1.68012
Fcγ Receptor-mediated Phagocytosis in Macrophages and Monocytes	2.28887	4.37902
GDNF Family Ligand-Receptor Interactions	4.44129	2.20043
AMPK Signaling	3.88569	2.74656
DNA Double-Strand Break Repair by Homologous Recombination	4.58808	2.00236
Neurotrophin/TRK Signaling	4.37289	2.16989
TGF-β Signaling	3.83958	2.63182
Insulin Receptor Signaling	4.36927	2.04242
IL-10 Signaling	5.55516	0.853287
MIF Regulation of Innate Immunity	5.92562	0.482309
Melanoma Signaling	4.49377	1.89483
VEGF Signaling	3.76691	2.58807
Apelin Cardiomyocyte Signaling Pathway	3.76691	2.58807
Systemic Lupus Erythematosus In B Cell Signaling Pathway	4.58088	1.73843
IL-17A Signaling in Gastric Cells	4.76682	1.54076
Cancer Drug Resistance By Drug Efflux	6.23059	0
Adipogenesis pathway	5.27935	0.923162
Cell Cycle Regulation by BTG Family Proteins	2.97733	3.21692
RHOGDI Signaling	1.00615	5.18148
ERBB4 Signaling	3.79141	2.36044
TNFR2 Signaling	5.55588	0.58343
Dilated Cardiomyopathy Signaling Pathway	4.18381	1.95148
Crosstalk between Dendritic Cells and Natural Killer Cells	4.84016	1.28893
RANK Signaling in Osteoclasts	4.84016	1.28893
April Mediated Signaling	4.88599	1.20087
B Cell Activating Factor Signaling	4.83596	1.1855
EIF2 Signaling	3.55703	2.38375
CD27 Signaling in Lymphocytes	4.18199	1.75336
Role of MAPK Signaling in Inhibiting the Pathogenesis of Influenza	4.40583	1.44796
Human Embryonic Stem Cell Pluripotency	4.55794	1.21891
Activation of IRF by Cytosolic Pattern Recognition Receptors	4.84016	0.909121
PFKFB4 Signaling Pathway	4.58393	1.11381
Nitric Oxide Signaling in the Cardiovascular System	4.07052	1.62287
Granulocyte Adhesion and Diapedesis	4.11392	1.57179
Ferroptosis Signaling Pathway	4.55614	0.942741
Actin Cytoskeleton Signaling	2.12542	3.36095
Pyroptosis Signaling Pathway	4.77406	0.700947
Gα12/13 Signaling	4.53177	0.936629
Telomerase Signaling	3.56837	1.76058
Amyloid Processing	3.44086	1.8729
FGF Signaling	3.26068	2.05202
GM-CSF Signaling	3.73203	1.54408
Regulation of Actin-based Motility by Rho	1.33212	3.85641
Actin Nucleation by ARP-WASP Complex	1.61998	3.5026
Aldosterone Signaling in Epithelial Cells	3.87319	1.23354
White Adipose Tissue Browning Pathway	3.66098	1.44272
iNOS Signaling	4.62964	0.461911
ERK5 Signaling	3.60244	1.48557
CCR3 Signaling in Eosinophils	2.97733	2.09013
Antioxidant Action of Vitamin C	2.67614	2.3857
UVA-Induced MAPK Signaling	3.79141	1.21601
Melanocyte Development and Pigmentation Signaling	3.79141	1.21601
Leptin Signaling in Obesity	3.54485	1.45767
mTOR Signaling	2.48735	2.49761
IL-2 Signaling	4.03526	0.948922
Oxytocin In Brain Signaling Pathway	4.66078	0.315202
CSDE1 Signaling Pathway	2.33706	2.62606
LXR/RXR Activation	4.76883	0.194132
Reelin Signaling in Neurons	2.90377	2.04926
PAK Signaling	1.89311	3.02233
Mechanisms of Viral Exit from Host Cells	2.81387	2.09575
Endometrial Cancer Signaling	3.12125	1.7002
PXR/RXR Activation	3.88732	0.909121
NF-κB Signaling	4.03889	0.726664
PD-1, PD-L1 cancer immunotherapy pathway	3.59217	1.14117
IL-17A Signaling in Airway Cells	3.82353	0.893968
IL-23 Signaling Pathway	4.67651	0
TWEAK Signaling	4.06391	0.537208
MSP-RON Signaling Pathway	4.14228	0.395812
Airway Inflammation in Asthma	3.16419	1.37104
p70S6K Signaling	2.3379	2.12514
IL-13 Signaling Pathway	3.36113	1.06308
Role of Hypercytokinemia/hyperchemokinemia in the Pathogenesis of Influenza	4.11535	0.287376
Apelin Adipocyte Signaling Pathway	1.64737	2.71421
Unfolded protein response	2.36323	1.99654
Endoplasmic Reticulum Stress Pathway	1.55292	2.80044
Interferon Signaling	3.02166	1.30909
Lymphotoxin β Receptor Signaling	4.26789	0
NAD Signaling Pathway	3.40687	0.838807
Ephrin B Signaling	1.96303	2.27652
GPCR-Mediated Nutrient Sensing in Enteroendocrine Cells	2.56919	1.63145
Pyrimidine Deoxyribonucleotides De Novo Biosynthesis I	1.48678	2.70802
IL-9 Signaling	4.16927	0
Phagosome Formation	2.29662	1.86965
MIF-mediated Glucocorticoid Regulation	4.11535	0
PCP (Planar Cell Polarity) Pathway	3.12125	0.958423
Inflammasome pathway	3.98918	0
Dopamine-DARPP32 Feedback in cAMP Signaling	2.8705	1.11381
Phospholipase C Signaling	2.36327	1.56574
FLT3 Signaling in Hematopoietic Progenitor Cells	2.5344	1.38988
Oncostatin M Signaling	2.73834	1.1855
Role of PI3K/AKT Signaling in the Pathogenesis of Influenza	3.8569	0
G Protein Signaling Mediated by Tubby	1.78912	2.03224
Role of MAPK Signaling in Promoting the Pathogenesis of Influenza	2.65932	1.08744
nNOS Signaling in Neurons	2.60048	1.12683
Ephrin A Signaling	1.7167	1.95779
Glutamate Removal from Folates	1.82167	1.84247
Asparagine Biosynthesis I	1.82167	1.84247
Role of RIG1-like Receptors in Antiviral Innate Immunity	3.64434	0
Basal Cell Carcinoma Signaling	2.77035	0.853287
Antiproliferative Role of Somatostatin Receptor 2	3.51513	0
Hypoxia Signaling in the Cardiovascular System	2.66925	0.82069
Sphingosine-1-phosphate Signaling	1.86752	1.61438
Neuroprotective Role of THOP1 in Alzheimer's Disease	1.86752	1.61438
Pyrimidine Ribonucleotides Interconversion	1.17253	2.25644
Phagosome Maturation	2.58154	0.800442
B Cell Receptor Signaling	2.28105	1.10033
Pyrimidine Ribonucleotides De Novo Biosynthesis	1.13549	2.19623
Glutathione-mediated Detoxification	1.13549	2.19623
Differential Regulation of Cytokine Production in Intestinal Epithelial Cells by IL-17A and IL-17F	2.54481	0.696001
Xenobiotic Metabolism CAR Signaling Pathway	1.64324	1.56645
Role of JAK1 and JAK3 in γc Cytokine Signaling	2.85114	0.34862
DNA Double-Strand Break Repair by Non-Homologous End Joining	3.17018	0
Apelin Liver Signaling Pathway	0.57481	2.58491
Synaptic Long Term Depression	2.11782	1.04165
β-alanine Degradation I	1.54786	1.57179
Regulation of IL-2 Expression in Activated and Anergic T Lymphocytes	2.62477	0.493205
PKCθ Signaling in T Lymphocytes	2.34976	0.757515
FcγRIIB Signaling in B Lymphocytes	1.736	1.35467
Role of JAK family kinases in IL-6-type Cytokine Signaling	1.42274	1.56645
Gαs Signaling	2.45009	0.537208
Regulation of eIF4 and p70S6K Signaling	1.74605	1.1366
Endocannabinoid Neuronal Synapse Pathway	1.52898	1.35269
GPCR-Mediated Integration of Enteroendocrine Signaling Exemplified by an L Cell	1.90556	0.828813
Role of NANOG in Mammalian Embryonic Stem Cell Pluripotency	2.5351	0.198457
Role of WNT/GSK-3β Signaling in the Pathogenesis of Influenza	1.85365	0.806231
NER (Nucleotide Excision Repair, Enhanced Pathway)	1.48678	1.16871
Fatty Acid β-oxidation III (Unsaturated, Odd Number)	1.273	1.31702
Role of MAPK Signaling in the Pathogenesis of Influenza	1.14296	1.38988
Gαi Signaling	1.62536	0.894293
Dermatan Sulfate Degradation (Metazoa)	1.71645	0.800494
HIPPO signaling	1.11374	1.35467
Role of NFAT in Regulation of the Immune Response	2.15362	0.296306
tRNA Charging	1.91831	0.519636
Dendritic Cell Maturation	2.13601	0.293356
Remodeling of Epithelial Adherens Junctions	2.04734	0.351181
Cellular Effects of Sildenafil (Viagra)	1.52898	0.850286
LPS/IL-1 Mediated Inhibition of RXR Function	1.57102	0.77503
Rapoport-Luebering Glycolytic Shunt	1.11778	1.16675
Inhibition of ARE-Mediated mRNA Degradation Pathway	0.947882	1.25678
IL-22 Signaling	0.601973	1.59476
Apelin Cardiac Fibroblast Signaling Pathway	1.48678	0.696001
SNARE Signaling Pathway	1.66928	0.493044
Calcium Signaling	1.87396	0.275744
Superpathway of Inositol Phosphate Compounds	1.28562	0.853287
Netrin Signaling	1.273	0.853287
T Cell Receptor Signaling	1.67017	0.4274
Glycolysis I	1.36308	0.640567
Role of p14/p19ARF in Tumor Suppression	0.53716	1.45767
cAMP-mediated signaling	1.72297	0.245367
Docosahexaenoic Acid (DHA) Signaling	1.94829	0
Amyotrophic Lateral Sclerosis Signaling	1.3426	0.581061
CNTF Signaling	1.51346	0.400666
Parkinson's Signaling	0	1.89881
Retinoic acid Mediated Apoptosis Signaling	1.46181	0.386472
Th1 and Th2 Activation Pathway	1.82095	0
Telomere Extension by Telomerase	1.81472	0
Differential Regulation of Cytokine Production in Macrophages and T Helper Cells by IL-17A and IL-17F	1.67017	0
Th2 Pathway	1.65813	0
Vitamin-C Transport	0	1.62299
SPINK1 Pancreatic Cancer Pathway	1.46181	0
FXR/RXR Activation	1.23041	0.188958
Guanine and Guanosine Salvage I	1.38664	0
SPINK1 General Cancer Pathway	1.31438	0
Altered T Cell and B Cell Signaling in Rheumatoid Arthritis	1.29066	0
T Cell Exhaustion Signaling Pathway	1.27193	0
