# Supplementary material for: An Examination of the Anti-Cancer Properties of Plant Cannabinoids in Preclinical Models of Mesothelioma
Source: Cancers (Basel). 2022 Aug 5;14(15):3813. doi: 10.3390/cancers14153813 (PMC9367527; doi:10.3390/cancers14153813)
Supplement: Supplementary file 1 [file cancers-14-03813-s001.zip › Table S6 CBG comparison IPA data.xls]

## Sheet: Z scores CBG
© 2000-2022 QIAGEN. All rights reserved.	Z-scores with CBG treatment
Canonical Pathways	H2452	MSTO
Cyclins and Cell Cycle Regulation	-1.698	-3.873
PI3K Signaling in B Lymphocytes	2.714	2.646
Kinetochore Metaphase Signaling Pathway	-2.646	-2.646
Senescence Pathway	0.943	3.873
TEC Kinase Signaling	2	2.714
Estrogen-mediated S-phase Entry	-1.897	-2.53
Phospholipase C Signaling	1.941	2.333
BER (Base Excision Repair) Pathway	-2.236	-2
Thrombin Signaling	1.387	2.828
NF-κB Signaling	2.53	1.508
NER (Nucleotide Excision Repair, Enhanced Pathway)	-2	-2
Role of NFAT in Regulation of the Immune Response	1.897	2
Regulation of IL-2 Expression in Activated and Anergic T Lymphocytes	2.496	1.342
Insulin Secretion Signaling Pathway	1.508	2.309
FAK Signaling	-2.043	1.698
Endothelin-1 Signaling	0.905	2.828
Gαq Signaling	1.265	2.449
Death Receptor Signaling	2.333	-1.342
Coronavirus Pathogenesis Pathway	1.147	2.496
Cell Cycle: G1/S Checkpoint Regulation	1.155	2.309
Cell Cycle Control of Chromosomal Replication	-1.265	-2.121
ERK5 Signaling	1.342	2
PKCθ Signaling in T Lymphocytes	1.667	1.633
CXCR4 Signaling	0.632	2.646
Crosstalk between Dendritic Cells and Natural Killer Cells	2.236	1
P2Y Purigenic Receptor Signaling Pathway	1.508	1.667
VEGF Family Ligand-Receptor Interactions	0.707	2.449
Production of Nitric Oxide and Reactive Oxygen Species in Macrophages	1.265	1.89
Apelin Endothelial Signaling Pathway	0.905	2.236
PDGF Signaling	1.134	2
Factors Promoting Cardiogenesis in Vertebrates	-1.213	1.897
Tumor Microenvironment Pathway	-0.426	2.668
HIF1α Signaling	-0.229	2.84
Adrenomedullin signaling pathway	2.121	0.905
Regulation Of The Epithelial Mesenchymal Transition In Development Pathway	1	2
Melanoma Signaling	-2	-1
Opioid Signaling Pathway	1.155	1.807
Thrombopoietin Signaling	0.707	2.236
Cholecystokinin/Gastrin-mediated Signaling	1	1.89
CCR5 Signaling in Macrophages	0.816	2
Role of NFAT in Cardiac Hypertrophy	-0.905	1.897
IL-7 Signaling Pathway	-1.667	-1.134
Necroptosis Signaling Pathway	2.333	0.447
Relaxin Signaling	1.633	1.134
Estrogen-Dependent Breast Cancer Signaling	1.134	1.633
Macropinocytosis Signaling	-1.134	1.633
Mitotic Roles of Polo-Like Kinase	-1.633	-1.134
IL-15 Production	1.069	1.667
IL-3 Signaling	-0.707	2
Actin Cytoskeleton Signaling	-1.89	-0.816
Estrogen Receptor Signaling	0.408	2.236
WNT/Ca+ pathway	0.632	2
Glioma Signaling	0.378	2.236
Oxytocin Signaling Pathway	1.155	1.414
ID1 Signaling Pathway	-2.132	0.426
Erythropoietin Signaling Pathway	1.291	1.265
Sumoylation Pathway	1.414	1.134
GADD45 Signaling	-0.943	1.604
Prolactin Signaling	0.632	1.89
Pulmonary Fibrosis Idiopathic Signaling Pathway	-1.826	0.688
Phagosome Formation	-0.894	1.604
TREM1 Signaling	1.134	1.342
ILK Signaling	1.069	1.387
EIF2 Signaling	-1.633	-0.816
Huntington's Disease Signaling	0	2.449
Induction of Apoptosis by HIV1	2.449	0
p70S6K Signaling	-0.378	2
Apelin Cardiomyocyte Signaling Pathway	0.378	2
Neuropathic Pain Signaling In Dorsal Horn Neurons	0.707	1.667
HOTAIR Regulatory Pathway	-1.291	1.069
CREB Signaling in Neurons	-0.218	2.138
Xenobiotic Metabolism CAR Signaling Pathway	1.342	-1
NGF Signaling	1.342	1
TNFR1 Signaling	1.89	0.447
B Cell Receptor Signaling	1.508	0.816
Neuroinflammation Signaling Pathway	0	2.309
Protein Kinase A Signaling	0	2.309
IL-8 Signaling	0.471	1.807
Xenobiotic Metabolism PXR Signaling Pathway	1.134	-1.134
Apoptosis Signaling	-0.378	-1.89
Salvage Pathways of Pyrimidine Ribonucleotides	-1.89	0.378
Renin-Angiotensin Signaling	0.577	1.667
ERK/MAPK Signaling	-0.302	1.941
Antiproliferative Role of TOB in T Cell Signaling	0	2.236
UVC-Induced MAPK Signaling	0	2.236
Synaptic Long Term Depression	0	2.236
Acute Phase Response Signaling	1.508	0.707
IL-17 Signaling	-0.302	1.89
Ferroptosis Signaling Pathway	0.816	1.342
VEGF Signaling	0.816	1.342
Role of Hypercytokinemia/hyperchemokinemia in the Pathogenesis of Influenza	0.816	1.342
Colorectal Cancer Metastasis Signaling	0.447	1.698
IL-13 Signaling Pathway	-1.134	1
Breast Cancer Regulation by Stathmin1	0	2.132
Neuregulin Signaling	0	2.121
Synaptic Long Term Potentiation	0.707	1.414
Fcγ Receptor-mediated Phagocytosis in Macrophages and Monocytes	-1.414	0.707
Hepatic Fibrosis Signaling Pathway	-0.522	1.569
PPAR Signaling	-1.633	-0.447
Regulation of Cellular Mechanics by Calpain Protease	0.447	1.633
ATM Signaling	0.905	1.155
Chemokine Signaling	0.378	1.633
Pyridoxal 5'-phosphate Salvage Pathway	-1.633	0.378
mTOR Signaling	0	2
Endocannabinoid Neuronal Synapse Pathway	N/A	2
Insulin Receptor Signaling	0	2
TNFR2 Signaling	2	N/A
α-Adrenergic Signaling	0	2
IL-1 Signaling	2	0
April Mediated Signaling	2	N/A
TWEAK Signaling	2	N/A
Aldosterone Signaling in Epithelial Cells	0	2
iNOS Signaling	2	N/A
CD27 Signaling in Lymphocytes	N/A	2
ERBB4 Signaling	0	2
Unfolded protein response	N/A	2
Role of Pattern Recognition Receptors in Recognition of Bacteria and Viruses	0.333	1.633
GP6 Signaling Pathway	0.333	1.633
NRF2-mediated Oxidative Stress Response	0.333	1.633
LPS-stimulated MAPK Signaling	0.333	1.633
MYC Mediated Apoptosis Signaling	1.633	-0.333
Oxytocin In Brain Signaling Pathway	-1.134	0.816
Aryl Hydrocarbon Receptor Signaling	-0.447	-1.5
STAT3 Pathway	-0.632	1.265
ERBB Signaling	0	1.89
Androgen Signaling	0.707	1.134
Regulation of Actin-based Motility by Rho	-1	-0.816
Cardiac Hypertrophy Signaling	-1	0.816
Cardiac Hypertrophy Signaling (Enhanced)	0	1.807
Ephrin B Signaling	-1.342	-0.447
Reelin Signaling in Neurons	1.342	0.447
Glioma Invasiveness Signaling	-1.342	0.447
Pancreatic Adenocarcinoma Signaling	0.333	1.414
Corticotropin Releasing Hormone Signaling	0.333	1.414
fMLP Signaling in Neutrophils	0.378	1.342
AMPK Signaling	1.342	0.378
Growth Hormone Signaling	-0.378	1.342
Endocannabinoid Developing Neuron Pathway	-1.342	-0.378
Systemic Lupus Erythematosus In B Cell Signaling Pathway	0.209	1.5
MSP-RON Signaling In Macrophages Pathway	0.707	1
Natural Killer Cell Signaling	1	0.707
Leukocyte Extravasation Signaling	-0.302	1.387
Regulation Of The Epithelial Mesenchymal Transition By Growth Factors Pathway	0	1.667
Autophagy	0.832	-0.832
Endocannabinoid Cancer Inhibition Pathway	0.577	1.069
Signaling by Rho Family GTPases	1.265	0.378
Non-Small Cell Lung Cancer Signaling	-1.633	N/A
Activation of IRF by Cytosolic Pattern Recognition Receptors	1.633	N/A
PPARα/RXRα Activation	0	-1.633
cAMP-mediated signaling	N/A	1.633
CD40 Signaling	1.633	N/A
Epithelial Adherens Junction Signaling	0.333	-1.265
Cell Cycle: G2/M DNA Damage Checkpoint Regulation	0.333	1.265
Integrin Signaling	-0.333	1.265
MSP-RON Signaling In Cancer Cells Pathway	0.277	1.265
Pulmonary Healing Signaling Pathway	-0.426	1.091
Nitric Oxide Signaling in the Cardiovascular System	0.378	1.134
HGF Signaling	-1.155	0.333
WNT/β-catenin Signaling	0.775	-0.707
White Adipose Tissue Browning Pathway	1	-0.447
Calcium Signaling	1	0.447
Neurotrophin/TRK Signaling	0.447	1
HER-2 Signaling in Breast Cancer	0.229	1.213
G-Protein Coupled Receptor Signaling	0.2	1.213
Wound Healing Signaling Pathway	-0.5	0.905
GNRH Signaling	0	1.387
Type II Diabetes Mellitus Signaling	0.378	1
MIF Regulation of Innate Immunity	1.342	N/A
ERB2-ERBB3 Signaling	-1.342	N/A
Ceramide Signaling	1.342	0
CCR3 Signaling in Eosinophils	-1.342	N/A
Fc Epsilon RI Signaling	0	1.342
NAD Signaling Pathway	-1.342	0
PFKFB4 Signaling Pathway	-1.342	0
FAT10 Cancer Signaling Pathway	0	1.342
14-3-3-mediated Signaling	0	1.342
RANK Signaling in Osteoclasts	1.342	N/A
GPCR-Mediated Nutrient Sensing in Enteroendocrine Cells	0.447	0.816
Sperm Motility	0.447	0.816
p53 Signaling	0.905	0.333
JAK/STAT Signaling	0.707	0.447
p38 MAPK Signaling	-0.333	0.816
Dopamine-DARPP32 Feedback in cAMP Signaling	0	1.134
Ovarian Cancer Signaling	N/A	1.134
Agrin Interactions at Neuromuscular Junction	-1.134	0
Role of CHK Proteins in Cell Cycle Checkpoint Control	0	1.134
Gα12/13 Signaling	1.134	N/A
TGF-β Signaling	-1.134	0
Ephrin Receptor Signaling	-0.378	0.707
eNOS Signaling	0.378	0.707
Synaptogenesis Signaling Pathway	0.302	0.775
G Beta Gamma Signaling	-0.333	0.707
Sphingosine-1-phosphate Signaling	1	N/A
Role of RIG1-like Receptors in Antiviral Innate Immunity	1	N/A
GPCR-Mediated Integration of Enteroendocrine Signaling Exemplified by an L Cell	N/A	-1
4-1BB Signaling in T Lymphocytes	1	N/A
GDNF Family Ligand-Receptor Interactions	1	N/A
Neuroprotective Role of THOP1 in Alzheimer's Disease	N/A	1
PD-1, PD-L1 cancer immunotherapy pathway	N/A	1
Dilated Cardiomyopathy Signaling Pathway	N/A	-1
Hypoxia Signaling in the Cardiovascular System	1	0
IL-17A Signaling in Gastric Cells	1	N/A
Mouse Embryonic Stem Cell Pluripotency	-1	N/A
BMP signaling pathway	1	N/A
Antioxidant Action of Vitamin C	-1	N/A
Interferon Signaling	0	1
Role of PKR in Interferon Induction and Antiviral Response	0.905	0
Polyamine Regulation in Colon Cancer	0.447	0.447
RAC Signaling	0.447	-0.447
CLEAR Signaling Pathway	0.535	-0.302
Glioblastoma Multiforme Signaling	-0.258	0.577
Acute Myeloid Leukemia Signaling	0.378	0.447
RHOGDI Signaling	0.447	0.378
Basal Cell Carcinoma Signaling	-0.816	N/A
PI3K/AKT Signaling	-0.816	0
Pyroptosis Signaling Pathway	N/A	0.816
Melatonin Signaling	-0.816	0
Thyroid Cancer Signaling	0	0.816
HMGB1 Signaling	0	0.707
Semaphorin Neuronal Repulsive Signaling Pathway	0	0.707
BEX2 Signaling Pathway	-0.632	0
PTEN Signaling	0	0.632
Osteoarthritis Pathway	0.277	0.333
Sirtuin Signaling Pathway	-0.535	0
Xenobiotic Metabolism General Signaling Pathway	-0.447	N/A
Role of IL-17F in Allergic Inflammatory Airway Diseases	0.447	N/A
Renal Cell Carcinoma Signaling	-0.447	N/A
CDK5 Signaling	0.447	N/A
PEDF Signaling	0.447	N/A
Angiopoietin Signaling	0.447	N/A
Role of WNT/GSK-3β Signaling in the Pathogenesis of Influenza	-0.447	N/A
CSDE1 Signaling Pathway	0	0.447
IGF-1 Signaling	0	-0.447
VDR/RXR Activation	0.447	0
Small Cell Lung Cancer Signaling	0	-0.447
Melanocyte Development and Pigmentation Signaling	N/A	0.447
FGF Signaling	-0.447	N/A
EGF Signaling	0.447	N/A
Cell Cycle Regulation by BTG Family Proteins	0	-0.447
Gαs Signaling	N/A	0.447
PCP (Planar Cell Polarity) Pathway	0.378	N/A
Role of BRCA1 in DNA Damage Response	-0.378	0
IL-6 Signaling	0.333	0
Th2 Pathway	N/A	N/A
Adipogenesis pathway	N/A	N/A
Endoplasmic Reticulum Stress Pathway	N/A	N/A
UVA-Induced MAPK Signaling	N/A	N/A
Rapoport-Luebering Glycolytic Shunt	N/A	N/A
Role of JAK1 and JAK3 in γc Cytokine Signaling	N/A	N/A
β-alanine Degradation I	N/A	N/A
Inhibition of Angiogenesis by TSP1	0	0
HIPPO signaling	N/A	N/A
Amyloid Processing	N/A	N/A
PXR/RXR Activation	N/A	N/A
Role of MAPK Signaling in the Pathogenesis of Influenza	N/A	N/A
Endometrial Cancer Signaling	N/A	N/A
tRNA Charging	N/A	N/A
DNA damage-induced 14-3-3σ Signaling	N/A	N/A
Gluconeogenesis I	N/A	N/A
Granulocyte Adhesion and Diapedesis	N/A	N/A
Molecular Mechanisms of Cancer	N/A	N/A
Semaphorin Signaling in Neurons	N/A	N/A
G Protein Signaling Mediated by Tubby	N/A	N/A
MIF-mediated Glucocorticoid Regulation	N/A	N/A
Xenobiotic Metabolism AHR Signaling Pathway	N/A	N/A
Agranulocyte Adhesion and Diapedesis	N/A	N/A
Glutamate Removal from Folates	N/A	N/A
Apelin Adipocyte Signaling Pathway	N/A	N/A
Pyrimidine Ribonucleotides De Novo Biosynthesis	N/A	N/A
Circadian Rhythm Signaling	N/A	N/A
PAK Signaling	N/A	N/A
Role of NANOG in Mammalian Embryonic Stem Cell Pluripotency	N/A	N/A
Protein Ubiquitination Pathway	N/A	N/A
Hepatic Fibrosis / Hepatic Stellate Cell Activation	N/A	N/A
Role of OCT4 in Mammalian Embryonic Stem Cell Pluripotency	N/A	N/A
Role of Tissue Factor in Cancer	N/A	N/A
Differential Regulation of Cytokine Production in Intestinal Epithelial Cells by IL-17A and IL-17F	N/A	N/A
FLT3 Signaling in Hematopoietic Progenitor Cells	N/A	N/A
Mechanisms of Viral Exit from Host Cells	N/A	N/A
Role of Osteoblasts, Osteoclasts and Chondrocytes in Rheumatoid Arthritis	N/A	N/A
Glycolysis I	N/A	N/A
BAG2 Signaling Pathway	0	0
Role of PI3K/AKT Signaling in the Pathogenesis of Influenza	0	N/A
Antiproliferative Role of Somatostatin Receptor 2	N/A	0
DNA Double-Strand Break Repair by Homologous Recombination	N/A	N/A
Apelin Liver Signaling Pathway	N/A	N/A
Lymphotoxin β Receptor Signaling	N/A	N/A
Germ Cell-Sertoli Cell Junction Signaling	N/A	N/A
Human Embryonic Stem Cell Pluripotency	N/A	N/A
Sertoli Cell-Sertoli Cell Junction Signaling	N/A	N/A
Virus Entry via Endocytic Pathways	N/A	N/A
RAR Activation	N/A	N/A
UVB-Induced MAPK Signaling	0	N/A
IL-17A Signaling in Airway Cells	N/A	N/A
Role of MAPK Signaling in Promoting the Pathogenesis of Influenza	0	N/A
Coronavirus Replication Pathway	N/A	N/A
Phagosome Maturation	N/A	N/A
Remodeling of Epithelial Adherens Junctions	N/A	N/A
Pyrimidine Ribonucleotides Interconversion	N/A	N/A
B Cell Activating Factor Signaling	N/A	N/A
Asparagine Biosynthesis I	N/A	N/A
Role of JAK family kinases in IL-6-type Cytokine Signaling	N/A	N/A
Airway Inflammation in Asthma	N/A	N/A
Mismatch Repair in Eukaryotes	N/A	N/A
Paxillin Signaling	N/A	0
Dermatan Sulfate Degradation (Metazoa)	N/A	N/A
Role of IL-17A in Arthritis	N/A	N/A
IL-23 Signaling Pathway	N/A	N/A
Tumoricidal Function of Hepatic Natural Killer Cells	N/A	N/A
Role of JAK1, JAK2 and TYK2 in Interferon Signaling	N/A	N/A
IL-9 Signaling	N/A	N/A
GM-CSF Signaling	N/A	N/A
Role of Macrophages, Fibroblasts and Endothelial Cells in Rheumatoid Arthritis	N/A	N/A
Fatty Acid β-oxidation III (Unsaturated, Odd Number)	N/A	N/A
Chronic Myeloid Leukemia Signaling	N/A	N/A
Glutathione-mediated Detoxification	N/A	N/A
Glucocorticoid Receptor Signaling	N/A	N/A
Th1 and Th2 Activation Pathway	N/A	N/A
Selenocysteine Biosynthesis II (Archaea and Eukaryotes)	N/A	N/A
Guanine and Guanosine Salvage I	N/A	N/A
IL-10 Signaling	N/A	N/A
Tight Junction Signaling	N/A	N/A
Cellular Effects of Sildenafil (Viagra)	N/A	N/A
Inflammasome pathway	N/A	N/A
Toll-like Receptor Signaling	N/A	N/A
Inhibition of Matrix Metalloproteases	N/A	N/A
Bladder Cancer Signaling	N/A	N/A
Hepatic Cholestasis	N/A	N/A
LXR/RXR Activation	0	0
Axonal Guidance Signaling	N/A	N/A
Docosahexaenoic Acid (DHA) Signaling	N/A	N/A
Netrin Signaling	N/A	N/A
Pyrimidine Deoxyribonucleotides De Novo Biosynthesis I	N/A	N/A
Hereditary Breast Cancer Signaling	N/A	N/A
Retinoic acid Mediated Apoptosis Signaling	N/A	N/A
Regulation of the Epithelial-Mesenchymal Transition Pathway	N/A	N/A
Pyruvate Fermentation to Lactate	N/A	N/A
Role of MAPK Signaling in Inhibiting the Pathogenesis of Influenza	0	N/A
Actin Nucleation by ARP-WASP Complex	N/A	N/A
Telomerase Signaling	N/A	N/A
Leptin Signaling in Obesity	N/A	N/A
nNOS Signaling in Neurons	N/A	N/A
Sonic Hedgehog Signaling	N/A	N/A
Atherosclerosis Signaling	N/A	N/A
Apelin Pancreas Signaling Pathway	N/A	N/A
NF-κB Activation by Viruses	0	N/A
Ephrin A Signaling	N/A	N/A
Xenobiotic Metabolism Signaling	N/A	N/A
IL-17A Signaling in Fibroblasts	N/A	N/A
Clathrin-mediated Endocytosis Signaling	N/A	N/A
IL-12 Signaling and Production in Macrophages	N/A	N/A
FcγRIIB Signaling in B Lymphocytes	N/A	N/A
Airway Pathology in Chronic Obstructive Pulmonary Disease	N/A	N/A
Apelin Cardiac Fibroblast Signaling Pathway	N/A	N/A
Caveolar-mediated Endocytosis Signaling	N/A	N/A
Prostate Cancer Signaling	N/A	N/A
Gap Junction Signaling	N/A	N/A
GABA Receptor Signaling	N/A	N/A
IL-2 Signaling	N/A	N/A

## Sheet: B-H p-values CBG
© 2000-2022 QIAGEN. All rights reserved.	Benjamini-Hochberg corrected p-values with CBG treatment
Canonical Pathways	H2452	MSTO
Molecular Mechanisms of Cancer	35.6728	27.6398
Hepatic Fibrosis Signaling Pathway	23.1117	14.9104
GADD45 Signaling	19.7904	14.9762
Colorectal Cancer Metastasis Signaling	19.4658	14.1286
Cyclins and Cell Cycle Regulation	15.9433	16.7182
Cell Cycle: G1/S Checkpoint Regulation	16.0304	15.6117
ID1 Signaling Pathway	15.1178	16.3678
Pancreatic Adenocarcinoma Signaling	16.6072	14.3223
Aryl Hydrocarbon Receptor Signaling	18.2275	12.6667
Pulmonary Healing Signaling Pathway	15.1327	15.5298
Pulmonary Fibrosis Idiopathic Signaling Pathway	19.4658	10.6628
Estrogen-mediated S-phase Entry	14.121	14.9049
Tumor Microenvironment Pathway	17.097	11.8374
Role of Macrophages, Fibroblasts and Endothelial Cells in Rheumatoid Arthritis	16.4026	10.6495
Hereditary Breast Cancer Signaling	11.191	15.7362
Ovarian Cancer Signaling	10.5228	16.0614
Glioblastoma Multiforme Signaling	15.3069	11.0367
Breast Cancer Regulation by Stathmin1	15.0531	8.58426
Small Cell Lung Cancer Signaling	12.408	10.8981
p53 Signaling	12.2924	10.8279
HIF1α Signaling	12.6168	9.90117
IL-8 Signaling	11.6002	9.85567
HER-2 Signaling in Breast Cancer	11.0841	10.3635
Senescence Pathway	11.7267	9.56164
Chronic Myeloid Leukemia Signaling	12.9311	8.11542
Cell Cycle: G2/M DNA Damage Checkpoint Regulation	9.44897	11.466
Estrogen Receptor Signaling	11.6002	9.08677
Role of CHK Proteins in Cell Cycle Checkpoint Control	8.95348	10.8717
HOTAIR Regulatory Pathway	10.3264	9.29186
Role of BRCA1 in DNA Damage Response	8.71807	10.6495
Coronavirus Pathogenesis Pathway	11.7921	7.22261
Axonal Guidance Signaling	11.191	7.56099
Hepatic Fibrosis / Hepatic Stellate Cell Activation	11.191	7.45134
Glioma Signaling	9.82788	8.58033
ILK Signaling	9.13393	9.17405
Bladder Cancer Signaling	9.15955	8.88508
ATM Signaling	7.82866	9.60743
Factors Promoting Cardiogenesis in Vertebrates	11.7267	5.68568
Prostate Cancer Signaling	9.2183	7.82953
Endocannabinoid Cancer Inhibition Pathway	7.09235	9.85436
IL-15 Production	11.0023	5.54019
Neuroinflammation Signaling Pathway	11.2063	5.21037
Sperm Motility	9.3576	6.98212
DNA damage-induced 14-3-3σ Signaling	7.09235	9.06158
Cell Cycle Control of Chromosomal Replication	9.02526	7.01675
GNRH Signaling	8.46524	7.48665
HGF Signaling	9.48957	6.20861
Opioid Signaling Pathway	6.47671	9.06158
MSP-RON Signaling In Cancer Cells Pathway	9.20294	6.00497
Erythropoietin Signaling Pathway	9.82557	5.19803
ERK/MAPK Signaling	7.02121	7.81064
IL-7 Signaling Pathway	8.83231	5.95676
PTEN Signaling	7.92967	6.69409
Regulation of the Epithelial-Mesenchymal Transition Pathway	11.1778	3.38249
BEX2 Signaling Pathway	8.66609	5.842
Renin-Angiotensin Signaling	8.92395	5.56255
Regulation Of The Epithelial Mesenchymal Transition By Growth Factors Pathway	10.293	4.14482
WNT/β-catenin Signaling	9.95378	4.45471
Glucocorticoid Receptor Signaling	8.64534	5.44537
Protein Kinase A Signaling	9.24463	4.75056
Osteoarthritis Pathway	9.02526	4.94507
Cardiac Hypertrophy Signaling (Enhanced)	9.19376	4.64562
Regulation of Cellular Mechanics by Calpain Protease	7.20469	6.63406
Neuregulin Signaling	8.11715	5.68568
Mitotic Roles of Polo-Like Kinase	6.10158	7.68344
STAT3 Pathway	6.53042	7.13801
MYC Mediated Apoptosis Signaling	4.68407	8.73837
Autophagy	6.2245	6.95885
HMGB1 Signaling	8.30885	4.55604
RAR Activation	8.15488	4.69045
P2Y Purigenic Receptor Signaling Pathway	7.53548	5.299
Thrombin Signaling	8.4556	4.37252
Circadian Rhythm Signaling	5.25136	7.56014
Role of PKR in Interferon Induction and Antiviral Response	8.38418	4.35548
CXCR4 Signaling	7.35495	5.36517
Corticotropin Releasing Hormone Signaling	6.97903	5.72548
Leukocyte Extravasation Signaling	5.13043	7.46902
Wound Healing Signaling Pathway	7.82866	4.69045
Non-Small Cell Lung Cancer Signaling	8.04775	4.45471
ERBB Signaling	8.04775	4.45471
FAT10 Cancer Signaling Pathway	8.22077	3.84993
Prolactin Signaling	7.34073	4.67205
Gαq Signaling	8.22077	3.75725
WNT/Ca+ pathway	9.50794	2.43845
Sumoylation Pathway	5.67371	6.10872
Cholecystokinin/Gastrin-mediated Signaling	6.10158	5.63121
Macropinocytosis Signaling	6.71351	5.00557
IL-17A Signaling in Fibroblasts	9.20522	2.21235
Regulation Of The Epithelial Mesenchymal Transition In Development Pathway	8.36109	2.85407
G Beta Gamma Signaling	5.81367	5.39414
LPS-stimulated MAPK Signaling	7.38013	3.77495
G-Protein Coupled Receptor Signaling	7.1446	3.92839
Neuropathic Pain Signaling In Dorsal Horn Neurons	4.81642	6.16759
Role of Pattern Recognition Receptors in Recognition of Bacteria and Viruses	7.74439	3.22697
Virus Entry via Endocytic Pathways	4.72731	6.0797
Semaphorin Signaling in Neurons	6.28885	4.45471
Signaling by Rho Family GTPases	7.47745	3.17387
Death Receptor Signaling	7.95485	2.68373
TNFR1 Signaling	6.85673	3.78028
PI3K Signaling in B Lymphocytes	7.21011	3.4226
Mismatch Repair in Eukaryotes	4.47324	6.10872
Fcγ Receptor-mediated Phagocytosis in Macrophages and Monocytes	5.02713	5.4212
Ephrin Receptor Signaling	4.94271	5.50542
Kinetochore Metaphase Signaling Pathway	4.55072	5.85664
Apelin Endothelial Signaling Pathway	8.22077	2.0544
Androgen Signaling	6.47671	3.77205
CREB Signaling in Neurons	7.07979	3.14239
Role of Tissue Factor in Cancer	6.19235	3.92839
Production of Nitric Oxide and Reactive Oxygen Species in Macrophages	5.95472	4.15644
TEC Kinase Signaling	6.78847	3.32198
Agrin Interactions at Neuromuscular Junction	5.91927	4.18024
Role of Osteoblasts, Osteoclasts and Chondrocytes in Rheumatoid Arthritis	7.6579	2.41363
Synaptogenesis Signaling Pathway	3.36916	6.6717
Growth Hormone Signaling	5.87465	4.15644
Epithelial Adherens Junction Signaling	4.33304	5.59466
CLEAR Signaling Pathway	5.671	4.25186
eNOS Signaling	4.29415	5.56255
Apoptosis Signaling	5.64865	4.19046
Cell Cycle Regulation by BTG Family Proteins	5.39867	4.41744
Role of NFAT in Cardiac Hypertrophy	4.61092	5.17807
Systemic Lupus Erythematosus In B Cell Signaling Pathway	6.36344	3.33757
Thrombopoietin Signaling	6.23761	3.4226
Sirtuin Signaling Pathway	7.77159	1.88398
Acute Phase Response Signaling	6.09298	3.52229
14-3-3-mediated Signaling	5.86957	3.72135
IL-12 Signaling and Production in Macrophages	7.43607	2.11124
fMLP Signaling in Neutrophils	6.65189	2.87047
Thyroid Cancer Signaling	5.55965	3.9241
Pyridoxal 5'-phosphate Salvage Pathway	4.06689	5.37833
JAK/STAT Signaling	6.45301	2.95461
Estrogen-Dependent Breast Cancer Signaling	5.48246	3.87134
Hepatic Cholestasis	5.16811	4.15644
Type II Diabetes Mellitus Signaling	6.03728	3.27027
Germ Cell-Sertoli Cell Junction Signaling	4.80318	4.48171
Adrenomedullin signaling pathway	3.62237	5.56694
VEGF Family Ligand-Receptor Interactions	5.36754	3.79725
p38 MAPK Signaling	6.07753	3.045
Insulin Secretion Signaling Pathway	3.89761	5.14369
Melatonin Signaling	3.88485	5.15055
Inhibition of Angiogenesis by TSP1	5.60923	3.40421
Glioma Invasiveness Signaling	3.85311	5.1198
IL-6 Signaling	5.8415	2.91621
TREM1 Signaling	5.6357	3.06289
Induction of Apoptosis by HIV1	6.14207	2.46084
PPARα/RXRα Activation	5.86957	2.72247
Endothelin-1 Signaling	5.14921	3.4226
Synaptic Long Term Potentiation	4.08608	4.45471
Renal Cell Carcinoma Signaling	5.52077	3.00164
UVC-Induced MAPK Signaling	4.63865	3.81127
Chemokine Signaling	4.54842	3.89657
Salvage Pathways of Pyrimidine Ribonucleotides	4.03966	4.35179
FAK Signaling	6.12549	2.23682
Tight Junction Signaling	4.66602	3.62973
RAC Signaling	4.71884	3.51591
NF-κB Activation by Viruses	6.62259	1.46449
DNA Double-Strand Break Repair by Homologous Recombination	3.27766	4.80888
CSDE1 Signaling Pathway	4.42636	3.64357
IL-17 Signaling	5.25136	2.81523
Integrin Signaling	3.41409	4.54642
GP6 Signaling Pathway	4.99168	2.93176
Acute Myeloid Leukemia Signaling	5.12768	2.77956
α-Adrenergic Signaling	4.62518	3.26515
RHOGDI Signaling	4.04471	3.80986
Caveolar-mediated Endocytosis Signaling	4.70543	3.1108
Semaphorin Neuronal Repulsive Signaling Pathway	3.71042	4.06094
IL-3 Signaling	5.55965	2.19434
Toll-like Receptor Signaling	4.61092	3.04217
VDR/RXR Activation	3.71042	3.94104
Natural Killer Cell Signaling	4.30104	3.33083
Relaxin Signaling	4.37006	3.24129
Role of JAK1, JAK2 and TYK2 in Interferon Signaling	4.92818	2.63756
Nitric Oxide Signaling in the Cardiovascular System	3.56348	3.87134
Endocannabinoid Developing Neuron Pathway	1.95554	5.44007
Cardiac Hypertrophy Signaling	4.69012	2.6581
Human Embryonic Stem Cell Pluripotency	6.54916	0.762057
Phagosome Formation	4.59042	2.6549
IGF-1 Signaling	3.89603	3.33757
Adipogenesis pathway	5.64834	1.49439
PI3K/AKT Signaling	5.014	2.07659
CD27 Signaling in Lymphocytes	4.39419	2.65174
Gap Junction Signaling	2.97076	4.04672
Crosstalk between Dendritic Cells and Natural Killer Cells	4.22282	2.77956
Polyamine Regulation in Colon Cancer	3.37916	3.57949
BER (Base Excision Repair) Pathway	3.90324	3.02552
TNFR2 Signaling	4.51209	2.39594
Oxytocin Signaling Pathway	4.39419	2.47074
MSP-RON Signaling In Macrophages Pathway	5.19863	1.65467
Mouse Embryonic Stem Cell Pluripotency	5.64865	1.18021
Role of IL-17F in Allergic Inflammatory Airway Diseases	4.82415	1.989
Regulation of Actin-based Motility by Rho	2.84477	3.92839
Fc Epsilon RI Signaling	4.38161	2.33039
VEGF Signaling	4.01796	2.63756
PFKFB4 Signaling Pathway	3.73985	2.89245
CD40 Signaling	5.00698	1.62158
BAG2 Signaling Pathway	4.41859	2.11219
Interferon Signaling	3.17746	3.32198
UVB-Induced MAPK Signaling	4.59967	1.88795
PDGF Signaling	4.36893	2.08142
ERBB4 Signaling	4.01074	2.39594
Role of Hypercytokinemia/hyperchemokinemia in the Pathogenesis of Influenza	3.49041	2.87047
PPAR Signaling	3.82582	2.49789
EIF2 Signaling	3.26537	3.0277
PCP (Planar Cell Polarity) Pathway	5.30076	0.972772
Atherosclerosis Signaling	4.08608	2.16894
Necroptosis Signaling Pathway	4.33304	1.89082
Huntington's Disease Signaling	3.16035	3.02552
MIF Regulation of Innate Immunity	4.98726	1.1891
Mechanisms of Viral Exit from Host Cells	4.039	2.1284
Ephrin B Signaling	2.97363	3.18283
CCR3 Signaling in Eosinophils	4.01372	2.12103
Phospholipase C Signaling	3.75794	2.30491
Dopamine-DARPP32 Feedback in cAMP Signaling	3.17746	2.86106
NRF2-mediated Oxidative Stress Response	3.73579	2.2928
Sonic Hedgehog Signaling	2.37729	3.65053
IL-1 Signaling	4.08608	1.93666
TGF-β Signaling	4.08608	1.93666
Aldosterone Signaling in Epithelial Cells	4.19479	1.82542
Activation of IRF by Cytosolic Pattern Recognition Receptors	5.08753	0.920104
Apelin Cardiomyocyte Signaling Pathway	4.01796	1.89715
Airway Pathology in Chronic Obstructive Pulmonary Disease	3.5844	2.33039
AMPK Signaling	3.0117	2.81541
Ephrin A Signaling	1.82475	3.94965
ERB2-ERBB3 Signaling	4.09095	1.65039
p70S6K Signaling	4.06689	1.52469
TWEAK Signaling	4.23092	1.31077
Melanoma Signaling	2.6653	2.83696
Ceramide Signaling	3.3897	2.02253
mTOR Signaling	2.78988	2.53471
IL-13 Signaling Pathway	3.6269	1.687
EGF Signaling	3.48311	1.82931
Agranulocyte Adhesion and Diapedesis	2.16271	3.14239
Actin Cytoskeleton Signaling	3.00252	2.22865
April Mediated Signaling	3.99833	1.21889
Angiopoietin Signaling	3.73579	1.47758
ERK5 Signaling	2.92255	2.27713
Clathrin-mediated Endocytosis Signaling	3.03324	2.12779
GPCR-Mediated Nutrient Sensing in Enteroendocrine Cells	2.07915	3.07886
B Cell Activating Factor Signaling	3.95014	1.20182
Xenobiotic Metabolism PXR Signaling Pathway	2.39051	2.74638
GDNF Family Ligand-Receptor Interactions	2.87312	2.24116
Hypoxia Signaling in the Cardiovascular System	2.87312	2.24116
Neurotrophin/TRK Signaling	2.82697	2.21235
Gα12/13 Signaling	4.04657	0.946449
Xenobiotic Metabolism Signaling	3.08085	1.89264
4-1BB Signaling in T Lymphocytes	4.39419	0.563778
iNOS Signaling	3.78017	1.14662
Sertoli Cell-Sertoli Cell Junction Signaling	2.24341	2.60437
Role of IL-17A in Arthritis	4.39419	0.404905
PD-1, PD-L1 cancer immunotherapy pathway	2.26109	2.51378
Basal Cell Carcinoma Signaling	3.88485	0.854762
Ferroptosis Signaling Pathway	2.5685	2.15679
Airway Inflammation in Asthma	3.31678	1.39238
RANK Signaling in Osteoclasts	3.36916	1.309
White Adipose Tissue Browning Pathway	1.82029	2.77343
Synaptic Long Term Depression	3.00728	1.55634
IL-10 Signaling	2.97363	1.54642
Lymphotoxin β Receptor Signaling	3.48311	1.03345
Role of WNT/GSK-3β Signaling in the Pathogenesis of Influenza	3.71042	0.80396
Oxytocin In Brain Signaling Pathway	2.34738	2.09217
NGF Signaling	2.77312	1.649
IL-17A Signaling in Gastric Cells	3.70451	0.652521
Dilated Cardiomyopathy Signaling Pathway	1.70607	2.63756
UVA-Induced MAPK Signaling	2.39884	1.90896
PEDF Signaling	3.54489	0.762057
Role of RIG1-like Receptors in Antiviral Innate Immunity	3.82362	0.471908
Inhibition of Matrix Metalloproteases	2.03467	2.18452
Pyroptosis Signaling Pathway	0.602028	3.57949
Granulocyte Adhesion and Diapedesis	1.34007	2.79035
G Protein Signaling Mediated by Tubby	2.86717	1.1891
Paxillin Signaling	1.55887	2.48219
BMP signaling pathway	2.62368	1.35119
Reelin Signaling in Neurons	1.80912	2.07681
Apelin Pancreas Signaling Pathway	1.84438	2.01339
Remodeling of Epithelial Adherens Junctions	2.19701	1.60918
Actin Nucleation by ARP-WASP Complex	1.75976	1.97962
Melanocyte Development and Pigmentation Signaling	1.08037	2.65174
MIF-mediated Glucocorticoid Regulation	3.17746	0.549923
Glutamate Removal from Folates	1.84116	1.88234
Asparagine Biosynthesis I	1.84116	1.88234
Sphingosine-1-phosphate Signaling	2.05168	1.649
Netrin Signaling	1.37855	2.31222
Dermatan Sulfate Degradation (Metazoa)	1.78365	1.89082
LXR/RXR Activation	2.01159	1.61803
Gαs Signaling	1.37799	2.24046
Regulation of IL-2 Expression in Activated and Anergic T Lymphocytes	3.07488	0.49489
Role of MAPK Signaling in Inhibiting the Pathogenesis of Influenza	2.02224	1.47758
Role of PI3K/AKT Signaling in the Pathogenesis of Influenza	3.13414	0.365559
Phagosome Maturation	2.185	1.29368
NER (Nucleotide Excision Repair, Enhanced Pathway)	1.61674	1.85138
FGF Signaling	2.64442	0.750732
Telomerase Signaling	1.56786	1.79955
Apelin Cardiac Fibroblast Signaling Pathway	2.66214	0.695982
Endometrial Cancer Signaling	2.38299	0.972772
Endoplasmic Reticulum Stress Pathway	1.61593	1.73002
IL-2 Signaling	2.36	0.96179
NF-κB Signaling	1.23334	2.05397
Differential Regulation of Cytokine Production in Intestinal Epithelial Cells by IL-17A and IL-17F	1.5518	1.65844
Xenobiotic Metabolism AHR Signaling Pathway	1.84438	1.35119
Unfolded protein response	1.16042	2.02253
β-alanine Degradation I	1.56565	1.61431
Tumoricidal Function of Hepatic Natural Killer Cells	1.51949	1.6326
PXR/RXR Activation	1.48087	1.65039
PAK Signaling	1.44946	1.66368
Role of OCT4 in Mammalian Embryonic Stem Cell Pluripotency	1.0538	2.01339
NAD Signaling Pathway	1.67308	1.35119
IL-23 Signaling Pathway	1.84438	1.16053
GPCR-Mediated Integration of Enteroendocrine Signaling Exemplified by an L Cell	0.732953	2.25797
nNOS Signaling in Neurons	1.82475	1.14662
Antiproliferative Role of Somatostatin Receptor 2	0.716204	2.22865
Amyloid Processing	0.981263	1.90259
Leptin Signaling in Obesity	1.32424	1.48933
Antioxidant Action of Vitamin C	2.16857	0.591201
CDK5 Signaling	2.14072	0.582267
IL-9 Signaling	2.15987	0.557058
Insulin Receptor Signaling	1.23852	1.45094
Cellular Effects of Sildenafil (Viagra)	0.712893	1.96877
Calcium Signaling	0.747713	1.90952
Role of NFAT in Regulation of the Immune Response	2.185	0.470581
Xenobiotic Metabolism General Signaling Pathway	1.76258	0.884166
Fatty Acid β-oxidation III (Unsaturated, Odd Number)	1.30042	1.34133
IL-17A Signaling in Airway Cells	2.21856	0.364254
Glutathione-mediated Detoxification	1.20895	1.31077
Inflammasome pathway	0.698739	1.76963
Xenobiotic Metabolism CAR Signaling Pathway	1.33304	1.0823
PKCθ Signaling in T Lymphocytes	1.60181	0.755155
Rapoport-Luebering Glycolytic Shunt	1.15034	1.1891
Selenocysteine Biosynthesis II (Archaea and Eukaryotes)	1.15034	1.1891
Pyruvate Fermentation to Lactate	1.15034	1.1891
Protein Ubiquitination Pathway	1.63352	0.695982
Neuroprotective Role of THOP1 in Alzheimer's Disease	0	2.30491
GM-CSF Signaling	1.40855	0.872532
Role of NANOG in Mammalian Embryonic Stem Cell Pluripotency	2.05168	0.201895
Pyrimidine Deoxyribonucleotides De Novo Biosynthesis I	1.5518	0.695982
cAMP-mediated signaling	0.380845	1.78356
Role of JAK family kinases in IL-6-type Cytokine Signaling	1.48873	0.664244
Gluconeogenesis I	1.46217	0.652521
Role of MAPK Signaling in Promoting the Pathogenesis of Influenza	1.5018	0.586702
Endocannabinoid Neuronal Synapse Pathway	0.712893	1.36741
Glycolysis I	1.43414	0.638967
FLT3 Signaling in Hematopoietic Progenitor Cells	1.24815	0.775099
B Cell Receptor Signaling	1.60693	0.404231
HIPPO signaling	1.21604	0.756342
FcγRIIB Signaling in B Lymphocytes	1.21604	0.756342
CCR5 Signaling in Macrophages	1.53718	0.422066
Retinoic acid Mediated Apoptosis Signaling	1.56086	0.392768
Apelin Adipocyte Signaling Pathway	0.61372	1.309
Th1 and Th2 Activation Pathway	1.47878	0.381201
GABA Receptor Signaling	1.30042	0.507566
Pyrimidine Ribonucleotides Interconversion	1.24485	0.557058
Role of JAK1 and JAK3 in γc Cytokine Signaling	1.42191	0.355602
Docosahexaenoic Acid (DHA) Signaling	0.471959	1.2939
Antiproliferative Role of TOB in T Cell Signaling	1.19279	0.563778
Pyrimidine Ribonucleotides De Novo Biosynthesis	1.20895	0.543094
tRNA Charging	0.4637	1.27615
Coronavirus Replication Pathway	0.417391	1.17626
Apelin Liver Signaling Pathway	1.46217	0
Guanine and Guanosine Salvage I	1.41387	0
Th2 Pathway	1.26205	0
Role of MAPK Signaling in the Pathogenesis of Influenza	1.24815	0
